# Supplementary material for: Saponin: a green and efficient natural surfactant for Suzuki–Miyaura cross-couplings of heteroaryl substrates in aqueous media at ambient conditions
Source: Royal Society of Chemistry journal article supplement (doi:10.1039/d3gc04757a), 2024-01-01
Supplement: d3gc04757a1.pdf [file d3gc04757a1.pdf]

## Saponin: A Green and Efficient Natural Surfactant for Suzuki-Miyaura Cross-Couplings of Heteroaryl Substrates in Aqueous Media at Ambient Conditions.

Vinothkumar Vinayagam,\* Subir Kumar Sadhukhan, Sreenivasa Reddy Kasu, Ravi Kumar Maroju, Tanguturi Venkatanarayana Hajay Kumar, Satish Kumar Karre, Dhurwasulu Baledi

<sup>a</sup>Medicinal Chemistry Division, Curia India Pvt. Ltd (Formerly Albany Molecular Research, Hyderabad Research Centre), MN park, Genome Valley, Turkapally, Hyderabad, India - 500078.

Email: [VinothKumar.Vinayagam@curiaglobal.com](mailto:VinothKumar.Vinayagam@curiaglobal.com), [vinothkv4@gmail.com](mailto:vinothkv4@gmail.com)

# Supporting Information

| S. No | Title                                                                                                                                                                             | Page No.  |
|-------|-----------------------------------------------------------------------------------------------------------------------------------------------------------------------------------|-----------|
| 1     | General Information-----                                                                                                                                                          | S2        |
| 2     | List of Suzuki-Miyaura Cross-Coupling products -----                                                                                                                              | S3        |
| 3     | Optimization of the amount of saponin -----                                                                                                                                       | S5        |
| 4     | The general procedure A and B of SMC reactions -----                                                                                                                              | S6        |
| 5     | Saponin isolation from Indian soapberry nuts -----                                                                                                                                | S7        |
| 6     | Scale-up reactions -----                                                                                                                                                          | S8-S11    |
| 7     | SEM, ELD, and DLS Spectras -----                                                                                                                                                  | S12-S19   |
| 8     | Spectral data ( <sup>1</sup> H, <sup>13</sup> C, and <sup>19</sup> F-NMR) of SMC products ( <b>3a – 3u</b> , <b>4a – 4h</b> , <b>5a – 5k</b> , <b>6a – 6g</b> ) -----             | S20-S42   |
| 9     | Scanned copy of spectra's ( <sup>1</sup> H, <sup>13</sup> C, and <sup>19</sup> F-NMR) of SMC products ( <b>3a – 3u</b> , <b>4a – 4h</b> , <b>5a – 5k</b> , <b>6a – 6g</b> ) ----- | S43-S97   |
| 10    | ICP-MS spectra of compounds <b>3m</b> , <b>4h</b> , and <b>5a</b>                                                                                                                 | S98-S100  |
| 11    | References -----                                                                                                                                                                  | S101-S102 |

## 1. General Information:

### Safety Statement:

No unusual or unexpected safety hazards were encountered or observed during the entire course of experiments.

### Reagents and Surfactants:

All the reagents and solvents used in this study were purchased from BLD Pharma, Sigma-Aldrich, Tokyo Chemical Industry Co., Ltd (TCI), and Combi-Blocks. All the aryl, heteroaryl halides, and aryl, heteroaryl boron reagents used for this study were purchased from BLD pharma, Combi-blocks, and TCI-Chemicals. For this study, we used saponin (cas no: 8047-15-2) obtained from four different sources, TCI-Chemicals (S0019), Sigma-Aldrich (from Quillaja bark (S7900), and purified from quillaja bark (S4521)), and Indian soapberry nuts purchased from local supermarket at Hyderabad in India. Pd-catalysts were purchased from BLD Pharma.

### Chromatography:

TLC plates: TLC silica gel 60 F<sub>254</sub>; 25 Aluminium sheets purchased from Merck. The developed TLC plate was analysed by a UV lamp (254 nm). The TLC plates were further analyzed with the use of iodine, and an ethanolic phosphomolybdic acid stain with the help of a heat gun. Flash chromatography was performed by a combiflash column, and pre-packed silica gel (100–200 mesh and 230–400 mesh) was used for CombiFlash column chromatographic separations.

### Analytical methods:

#### Nuclear Magnetic Resonance Spectroscopy (NMR), and Mass Spectrometry (MS):

All the <sup>1</sup>H, <sup>13</sup>C, and <sup>19</sup>F NMR spectra were recorded on a Bruker 400 MHz spectrometer in CDCl<sub>3</sub> or DMSO-*d*<sub>6</sub> with residual CHCl<sub>3</sub> (<sup>1</sup>H = 7.26 ppm, <sup>13</sup>C = 77.16 ppm) or DMSO-*d*<sub>6</sub> (<sup>1</sup>H = 2.55 ppm, <sup>13</sup>C = 40.46 ppm) as the internal standard. Deuterated solvents were purchased from Cambridge Isotope Laboratories. Chemical shifts are reported in parts per million (ppm). The data presented will be reported as follows; chemical shift, multiplicity in Hertz (Hz) (s = singlet, d = doublet, dd = doublet of doublet, t = triplet, m = multiplet, brs = broad singlet), coupling constant, and number of protons.

HRMS analysis (ESI-MS) mass spectral analysis was performed using Agilent Technologies 6540 UHD Accurate-mass Q-TOF LC/MS instrument.

Palladium residual assay was performed (ICP-MS method) using Agilent instrument, Model 7800.

All the reactions were monitored by Ultra-performance liquid chromatography-mass spectrometry (UPLC-MS) along with TLC analysis. The UPLC-MS analysis was performed using Waters: Acquity UPLC BEM 2.1 × 50 μm C-18 column with acetonitrile/Water as a mobile system.

### Scanning Electron Microscopy:

Instrument make: Joel; Model: JSM/7610F, compound with platinum coated.

### Dynamic Light Scattering (DLS):

Instrument make: Malvern Instruments

## 2. List of Suzuki-Miyaura Cross-Coupling products

### Scheme 1. SMC reaction of pyridyl boronic acids with heteroaryl bromides.

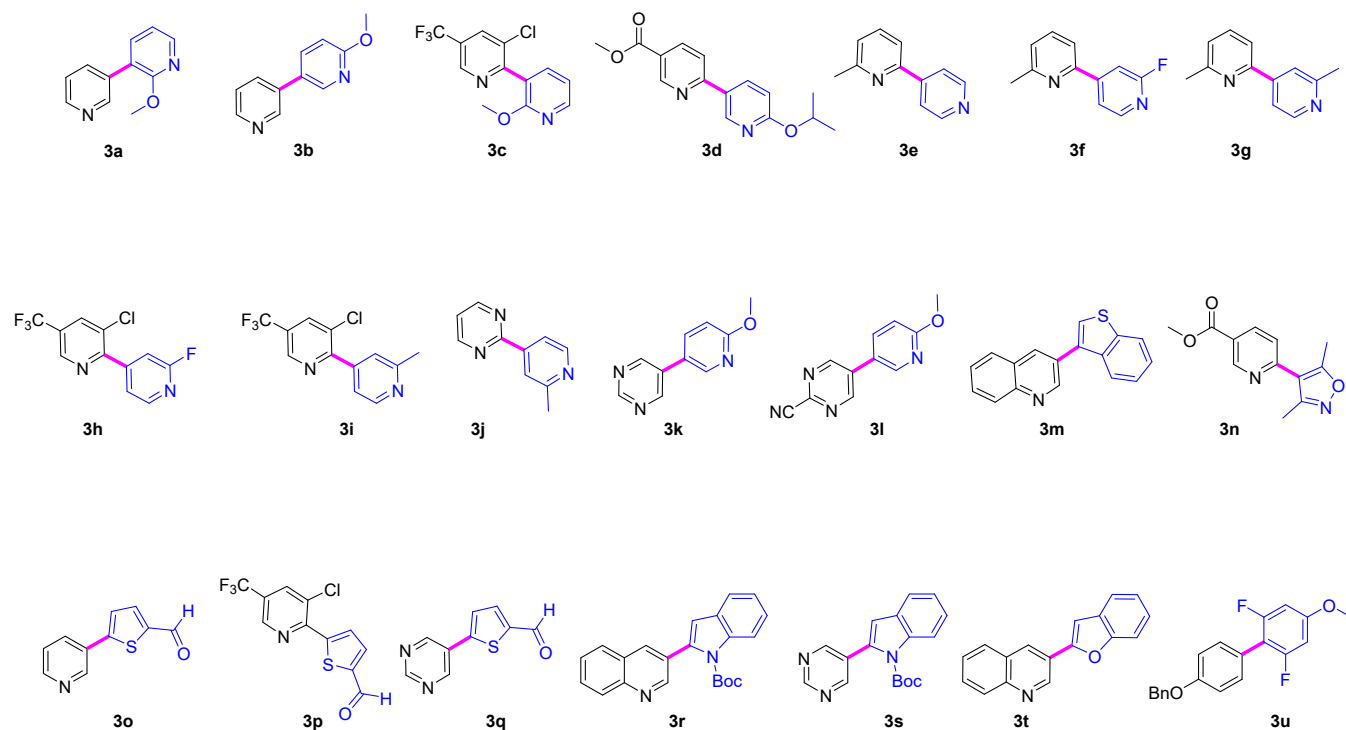

**Scheme 2. SMC reaction of pyrimidine boronic acids with heteroaryl bromides.**

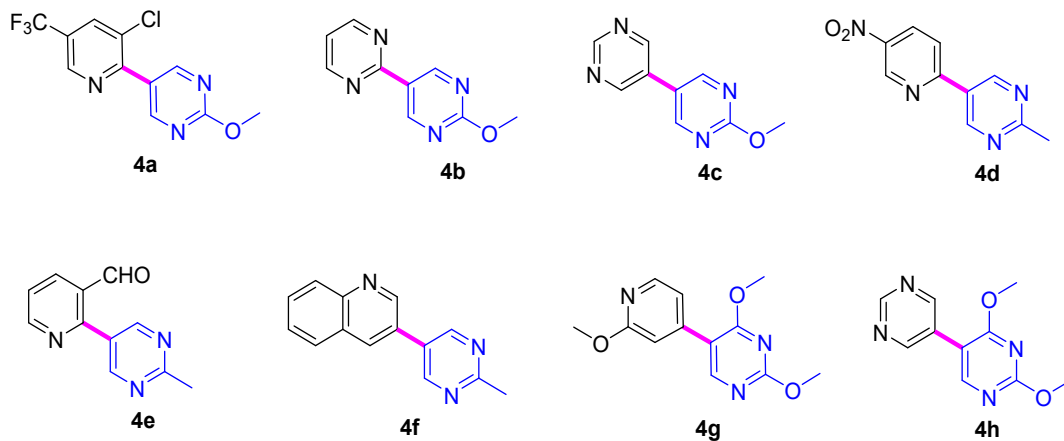

**Scheme 3. SMC reaction with 2-pyridyl boronic acid.<sup>a</sup>**

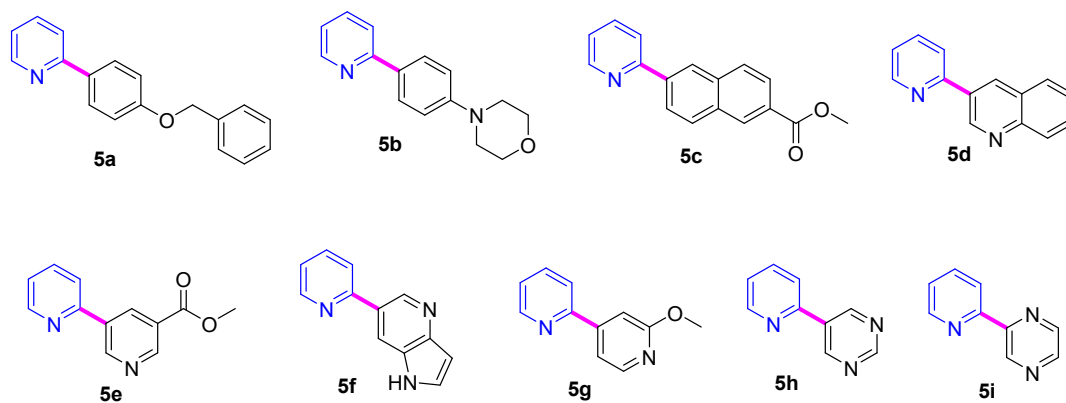

**Scheme 4. SMC reaction of alkyl boronic acids with aryl halides.<sup>a</sup>**

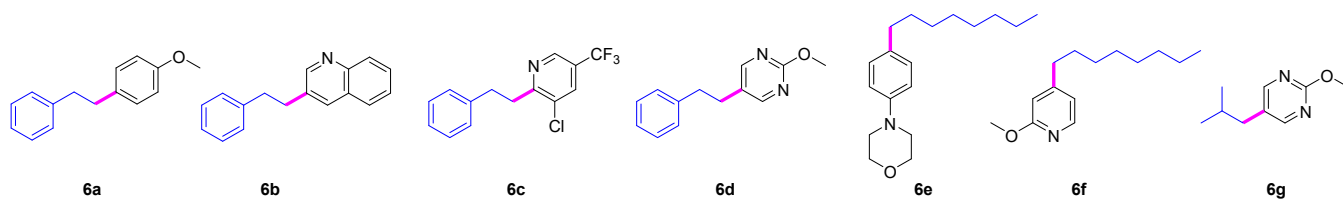

### 3. Optimization of the amount of saponin

Table-S1:

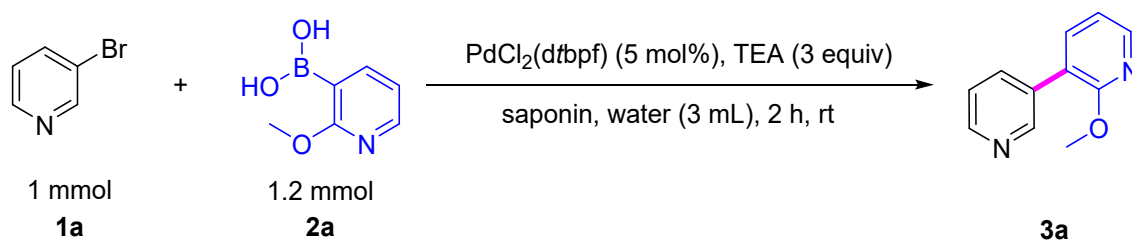

| Entry | Source of saponin                                        | Saponin quantity | Yield (%) <sup>b</sup> |
|-------|----------------------------------------------------------|------------------|------------------------|
| 1     | Saponin from Sigma Aldrich (purified from quillaja bark) | 10 wt %; 300 mg  | 62 %                   |
| 2     | Saponin from Sigma Aldrich (purified from quillaja bark) | 5 wt %; 150 mg   | 82 %                   |
| 3     | Saponin from Sigma Aldrich (purified from quillaja bark) | 2 wt %; 60 mg    | 88 %                   |
| 4     | Saponin from Sigma Aldrich (purified from quillaja bark) | 1 wt %; 30 mg    | 76 %                   |
| 5     | Saponin from Sigma Aldrich (purified from quillaja bark) | 0.5 wt %; 15 mg  | 62 %                   |

<sup>a</sup>Reaction conditions: **1a** (1.0 mmol), **2a** (1.2 mmol), PdCl<sub>2</sub>(dtbpf) (5 mol %), TEA (3 equiv), Water (3.0 mL), saponin, rt, 2–6 h. <sup>b</sup>Yields determined by <sup>1</sup>H NMR analysis using 1,3,5-trimethoxybenzene as an internal standard.

## 4. The general procedure A and B of SMC reactions

### General procedure-A: Suzuki-Miyaura Cross-Coupling

To a solution of heteroaryl bromide (1 mmol) **1a**, heteroaryl boronic acid (1.2 mmol, 1.2 equiv) **2a** in water (3.0 mL) was added TEA (0.42 mL, 3.0 mmol, 3.0 equiv) and saponin (60 mg) followed by PdCl<sub>2</sub>(d/bpf) (33 mg, 0.5 mmol, 5 mol %). The reaction mixture was stirred for 2-6 h at ambient temperature. After the completion of the reaction, as observed by thin-layer chromatography (TLC) and UPLC-MS analysis, the reaction mixture was diluted with water (10 mL), and EtOAc (20 mL) and stirred for a couple of minutes. The emulsion was filtered through celite washed with EtOAc (20 mL) and separated the organic layer. The aqueous layer was re-extracted with EtOAc (3 × 20 mL). The combined organic layers were washed with brine (20 mL), dried over anhydrous Na<sub>2</sub>SO<sub>4</sub>, filtered, and evaporated. The crude residue was purified by combiflash column chromatography using a mixture of hexanes/EtOAc (8:2) as an eluent to yield the corresponding cross-coupling product.

### General procedure-B: Suzuki-Miyaura Cross-Coupling for 2-pyridyl boronic acid

To a solution of heteroaryl bromide (1 mmol), saponin (80 mg) in water (3.0 mL)/THF (1.0 mL) was added K<sub>3</sub>PO<sub>4</sub> (636 mg, 3.0 mmol, 3 equiv), Cu(I)Cl (99 mg, 1.0 mmol, 1 equiv) and XPhos-Pd-G<sub>2</sub> (39.5 mg, 0.5 mmol, 5 mol %) followed by 2-pyridyl boronic acid (2.0 mmol, 2.0 equiv) The reaction mixture was stirred for 16 h at ambient temperature. After the completion of the reaction, as observed by thin-layer chromatography (TLC) and UPLC-MS analysis, the reaction mixture was diluted with water (10 mL), and EtOAc (20 mL) and stirred for a couple of minutes. The emulsion was filtered through celite washed with EtOAc (20 mL) and separated the organic layer. The aqueous layer was extracted with EtOAc (3 × 20 mL). The combined organic layers were washed with brine (20 mL), dried over anhydrous Na<sub>2</sub>SO<sub>4</sub>, filtered, and evaporated. The crude residue was purified by combiflash column chromatography using a mixture of hexanes/EtOAc (8:2) as an eluent to yield the corresponding cross-coupling product.

## 5. Saponin isolated from Indian soapberry nuts:

The soapnut is an ancient Indian herb used in Ayurveda, its botanical Name is *Sapindus trifoliatus* and its family name is Sapindaceae.<sup>1</sup> A dry soapnut is easily available across India. The dried nut was grinded as a fine powder to get brown color crude saponins. The crude material 10 g was washed with EtOAc (100 mL) three times to remove some non-polar impurities (~1 g of non-polar impurities obtained). The crude powder was used directly for the reaction as a surfactant (Entry-4 in Table 1). Later, the material was extracted with methanol (100 mL) three times and obtained 3 g of light yellow powder of saponins. The methanolic extracted material was tested as a surfactant (Entry-5 in Table 1). The <sup>1</sup>H-NMR of the methanolic extracted saponin from Indian soapberry nuts and saponin purchased from TCI-Japan and Sigma Aldrich (USA) is almost similar.

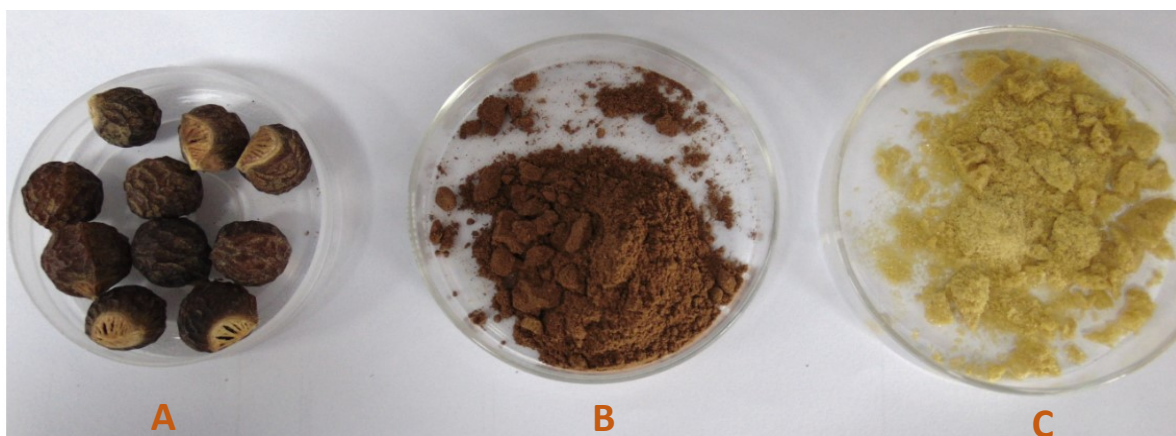

(A) Soapnut berries (B) powdered Soapnut berries/crude saponines (C) methanolic extracts of crude saponines.

- (a) Panda, A.; Kumar, A.; Mishra, S.; Mohapatra, S. S. Soapnut: A replacement of synthetic surfactant for cosmetic and biomedical applications. *Sustainable Chem. Pharm.* **2020**, *17*, 100297. (b) Kommalapati, R. R.; Valsaraj, K. T.; Constant, W. D.; Roy, D. Soil flushing using colloidal gas aphon suspensions generated from a plant-based surfactant. *J. Hazard. Mater.* **1998**, *60*, 73.

## 6. Scale-up reactions:

### Scale-up reaction-I

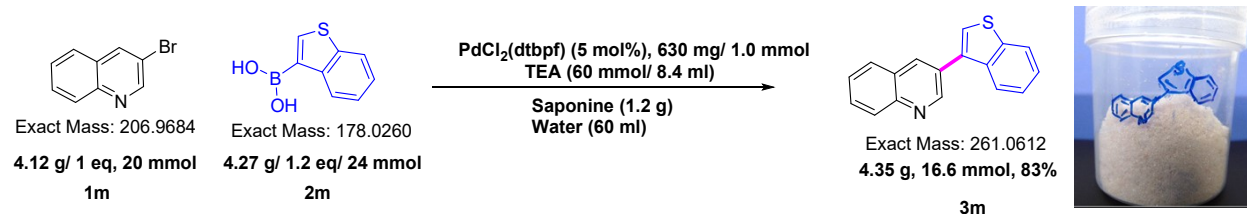

### Synthesis of 3-(benzo[b]thiophen-3-yl)quinoline (3m):

To a solution of 3-bromoquinoline **1m** (4.12 g, 20 mmol), benzo[b]thiophen-3-ylboronic acid **2m** (4.27 g, 24 mmol, 1.2 equiv) in water (60.0 mL) was added TEA (8.4 mL, 60 mmol, 3.0 equiv) and saponin (1.2 g) followed by  $\text{PdCl}_2(\text{dtbpf})$  (630 mg, 1.0 mmol, 5 mol %). The reaction mixture was stirred for 2 h at ambient temperature. After the completion of the reaction, as observed by thin-layer chromatography (TLC) and UPLC-MS analysis, the reaction mixture was diluted with water (100 mL), and EtOAc (200 mL) and stirred for a couple of minutes. The emulsion was filtered through celite washed with EtOAc ( $2 \times 50$  mL) and separated the organic layer. The aqueous layer was re-extracted with EtOAc ( $3 \times 100$  mL). The combined organic layers were washed with brine (100 mL), dried over anhydrous  $\text{Na}_2\text{SO}_4$ , filtered, and evaporated. The crude residue was purified by combiflash column chromatography using a mixture of hexanes/EtOAc (8:2) as an eluent to yield **3-(benzo[b]thiophen-3-yl)quinoline (3m)** (4.35 g, 16.6 mmol) in 83 % yield as an off-white solid.

The residual palladium content of the above purified **3-(benzo[b]thiophen-3-yl)quinoline (3m)** was tested by IPC-MS analysis and found that 12.01 ppm Palladium is present in the material.

The same above reaction of synthesis of **3-(benzo[b]thiophen-3-yl)quinoline (3m)** was performed in a 5.0 mmol batch with a reduced amount of Pd-catalyst load 2.0 mol% of  $\text{PdCl}_2(\text{dtbpf})$ . The reaction was completed in 4 h and provided the desired product (**3m**) (1.04 g, 4.0 mmol) in 80% yield after column chromatography.



### E-Factor calculation for the synthesis of 3-(benzo[b]thiophen-3-yl)quinoline (3m):

| Entry                  | Total material used | Mass of the total material used | Mass of the product | E-Factor               |
|------------------------|---------------------|---------------------------------|---------------------|------------------------|
| 1                      | Aryl Bromide        | 4.12 g                          | 4.35 g              | 15.08 ÷ 4.35<br>= 3.46 |
| 2                      | Boronic acid        | 4.27 g                          |                     |                        |
| 3                      | Pd-Catalyst         | 0.63 g                          |                     |                        |
| 4                      | Triethyl amine      | 6.06 g                          |                     |                        |
| <b>Total mass used</b> |                     | <b>15.08</b>                    |                     |                        |

The E-factor was calculated for only reaction and not for workup and column chromatography. Water is a safe solvent and saponin is a natural biodegradable surfactant therefore the amount of water and saponin are not included during the calculation of the total mass used.

### Scale-up reaction-II

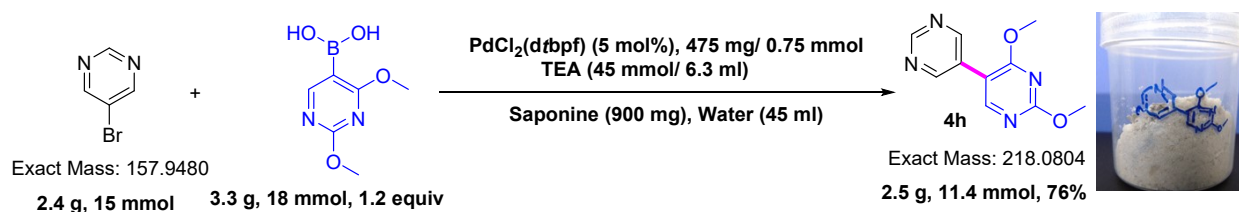

### Synthesis of 2,4-dimethoxy-5,5'-bipyrimidine (4h)

To a solution of 5-bromopyrimidine (2.4 g, 15 mmol), (2,4-dimethoxypyrimidin-5-yl)boronic acid (3.3 g, 18 mmol, 1.2 equiv) in water (45.0 mL) was added TEA (6.3 mL, 45 mmol, 3.0 equiv) and saponin (900 mg) followed by PdCl<sub>2</sub>(dtbpf) (475 mg, 0.75 mmol, 5 mol %). The reaction mixture was stirred for 10 h at ambient temperature. After the completion of the reaction, as observed by thin-layer chromatography (TLC) and UPLC-MS analysis, the reaction mixture was diluted with water (100 mL), and EtOAc (200 mL) and stirred for a couple of minutes. The emulsion was filtered through celite washed with EtOAc (2 × 50 mL) and separated the organic layer. The aqueous layer was re-extracted with EtOAc (3 × 100 mL). The

combined organic layers were washed with brine (100 mL), dried over anhydrous Na<sub>2</sub>SO<sub>4</sub>, filtered, and evaporated. The crude residue was purified by combiflash column chromatography using a mixture of hexanes/EtOAc (8:2) as an eluent to yield **2,4-dimethoxy-5,5'-bipyrimidine (4h)** (2.5 g, 11.4 mmol) in 76 % yield as an off-white solid.

The residual palladium content of the above purified material **2,4-dimethoxy-5,5'-bipyrimidine (4h)** was 41.2 ppm which was determined by IPC-MS analysis.

The same above reaction of synthesis of **2,4-dimethoxy-5,5'-bipyrimidine (4h)** was performed in a 5.0 mmol batch with a reduced amount of Pd-catalyst load 2.0 mol% of PdCl<sub>2</sub>(d/bpf). The reaction was completed in 16 h and provided the desired product (**4h**) (850 mg, 3.9 mmol) in 78% yield after column chromatography.

### Scale-up reaction-III

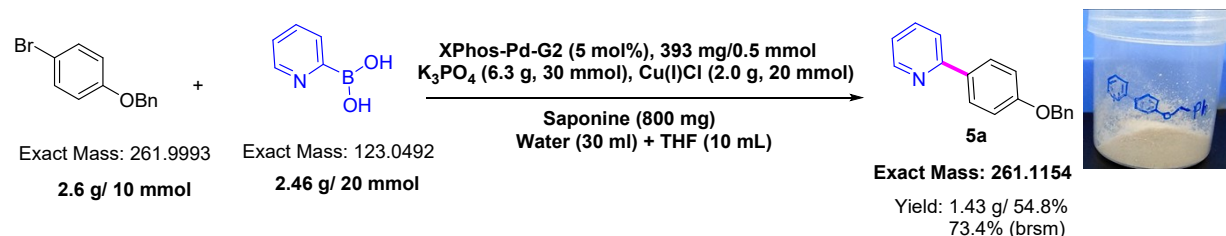

### Synthesis of 2-(4-(benzyloxy)phenyl)pyridine (5a):

To a solution of 1-(benzyloxy)-4-bromobenzene (2.6 g, 10 mmol, 1 equiv), saponin (800 mg) in water (30.0 mL)/THF (10.0 mL) was added K<sub>3</sub>PO<sub>4</sub> (6.3 g, 30.0 mmol, 3 equiv), XPhos-Pd-G<sub>2</sub> (393 mg, 0.5 mmol, 5 mol %) followed by Cu(I)Cl (990 mg, 10 mmol, 1 equiv) and 2-pyridyl boronic acid (2.46 g, 20.0 mmol, 2.0 equiv). The reaction mixture was stirred for 16 h at ambient temperature. After 16 h, the reaction mixture was diluted with water (100 mL), and EtOAc (200 mL) and stirred for a couple of minutes. The emulsion was filtered through celite washed with EtOAc (100 mL) and separated the organic layer. The aqueous layer was extracted with EtOAc (3 × 100 mL). The combined organic layers were washed with brine (100 mL), dried over anhydrous Na<sub>2</sub>SO<sub>4</sub>, filtered, and evaporated. The crude residue was purified by combiflash column chromatography using a mixture of hexanes/EtOAc (8:2) as an eluent to yield the **2-(4-(benzyloxy)phenyl)pyridine (5a)** (1.43 g) in 54.8 % yield as an off-white solid along with unreacted bromo compound.

The above-purified compound **2-(4-(benzyloxy)phenyl)pyridine (5a)** was tested for its residual palladium content by ICP-MS analysis and found that 1.88 ppm amount of Palladium was present in the material.

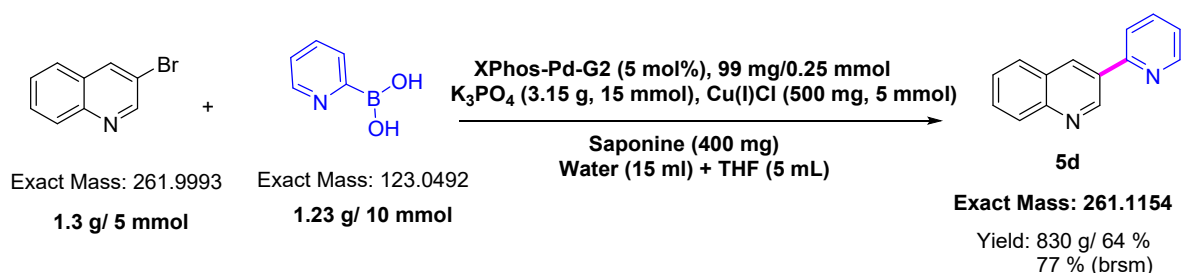

### 3-(pyridin-2-yl)quinoline (5d)

To a solution of 3-bromoquinoline (1.3 g, 5.0 mmol, 1 equiv), saponin (400 mg) in water (15.0 mL)/THF (5.0 mL) was added K<sub>3</sub>PO<sub>4</sub> (3.15 g, 15.0 mmol, 3 equiv), XPhos-Pd-G<sub>2</sub> (79 mg, 0.1 mmol, 2.0 mol %) followed by Cu(I)Cl (490 mg, 5 mmol, 1 equiv) and 2-pyridyl boronic acid (1.23 g, 10.0 mmol, 2.0 equiv). The reaction mixture was stirred for 16 h at ambient temperature. After 16 h, the reaction mixture was diluted with water (50 mL), and EtOAc (100 mL) and stirred for a couple of minutes. The emulsion was filtered through celite washed with EtOAc (100 mL) and separated the organic layer. The aqueous layer was extracted with EtOAc (3 × 50 mL). The combined organic layers were washed with brine (50 mL), dried over anhydrous Na<sub>2</sub>SO<sub>4</sub>, filtered, and evaporated. The crude residue was purified by combiflash column chromatography using a mixture of hexanes/EtOAc (8:2) as an eluent to yield the **23-(pyridin-2-yl)quinoline (5d)** (830 mg, 3.2 mmol) in 64 % yield as an off-white solid along with unreacted bromo compound.

## 7. SEM, ELD, and DLS Spectras

**Field Emission Scanning Electron Microscopy (FE-SEM) of Saponin/Sigma Aldrich (cas no: 8047-15-2) Product code: S4521**

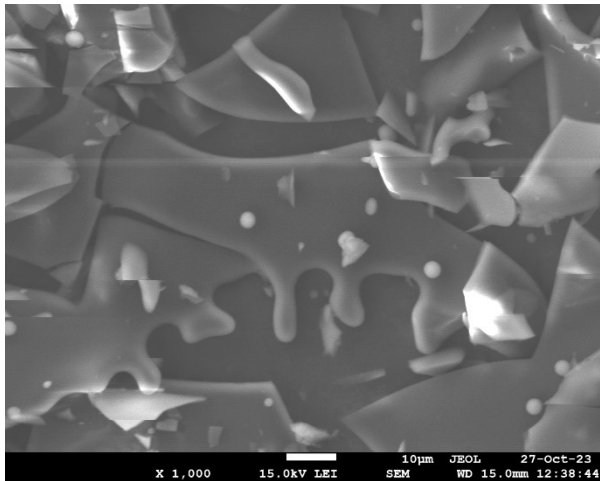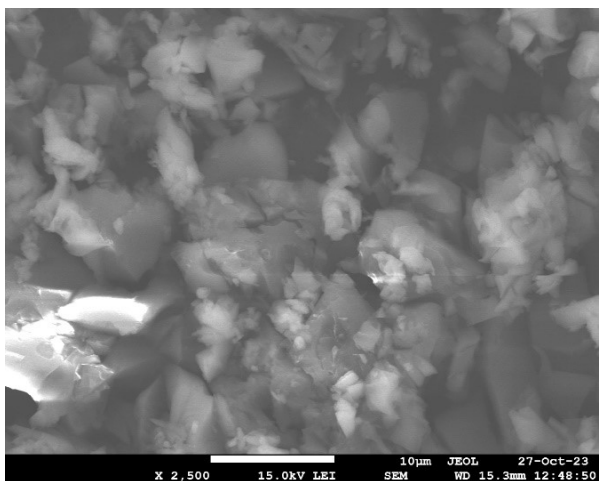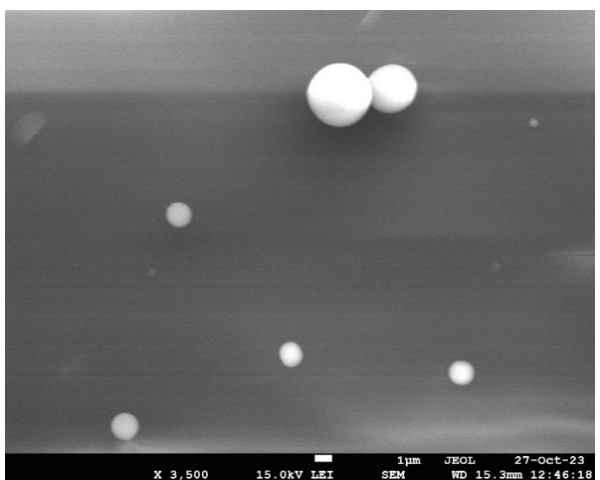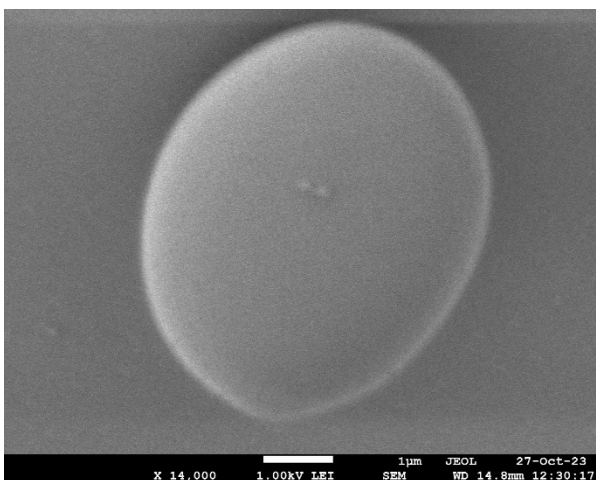

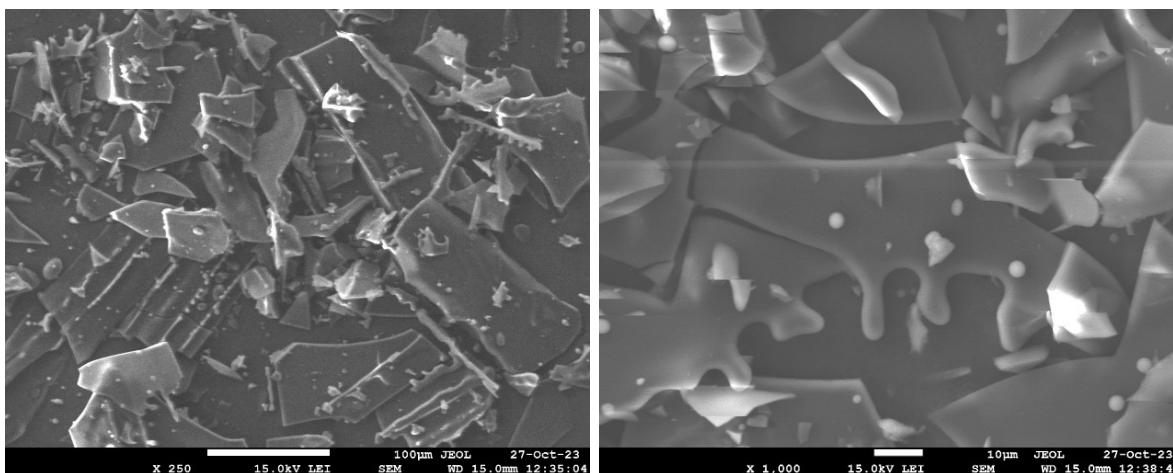

**Energy Dispersive Spectroscopy (EDS) of Saponin /Sigma Aldrich (cas no: 8047-15-2) Product code: S4521**

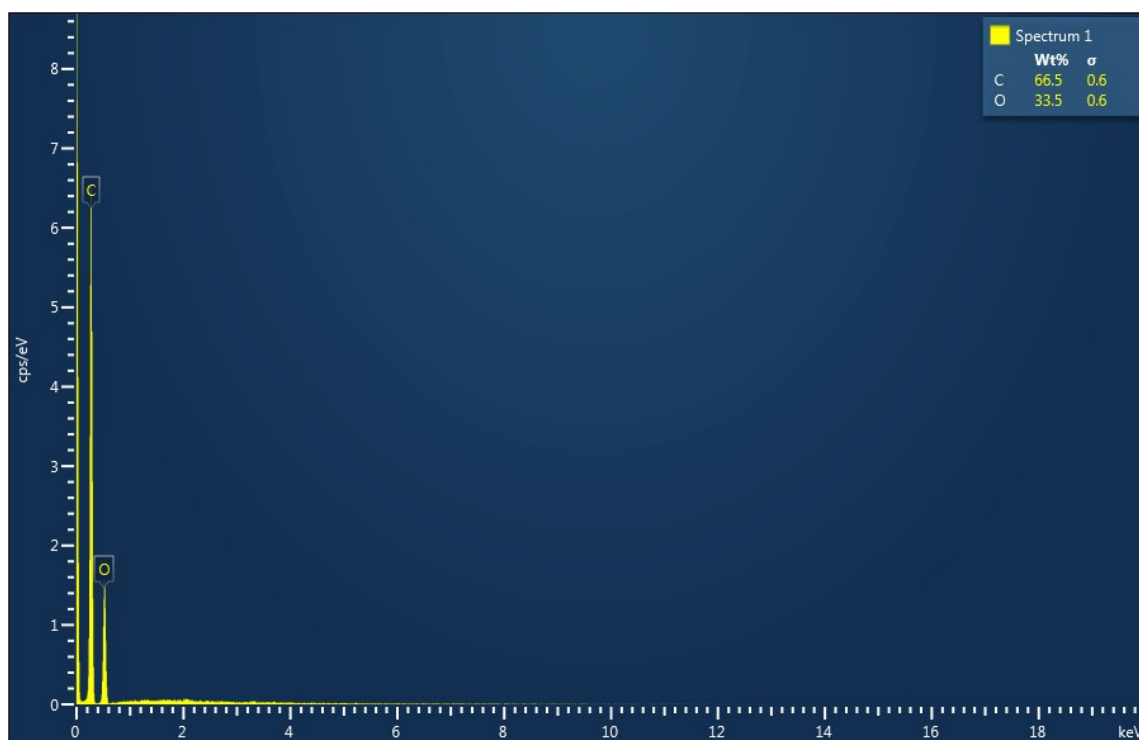

**Dynamic Light Scattering (DLS) of Saponin /Sigma Aldrich (cas no: 8047-15-2)**  
Product code: S4521

|                                | Size (d.nm):         | % Intensity: | St Dev (d.n...) |
|--------------------------------|----------------------|--------------|-----------------|
| <b>Z-Average (d.nm):</b> 165.5 | <b>Peak 1:</b> 231.2 | 97.0         | 158.6           |
| <b>Pdl:</b> 0.396              | <b>Peak 2:</b> 5039  | 3.0          | 591.5           |
| <b>Intercept:</b> 0.953        | <b>Peak 3:</b> 0.000 | 0.0          | 0.000           |

**Result quality :** Good

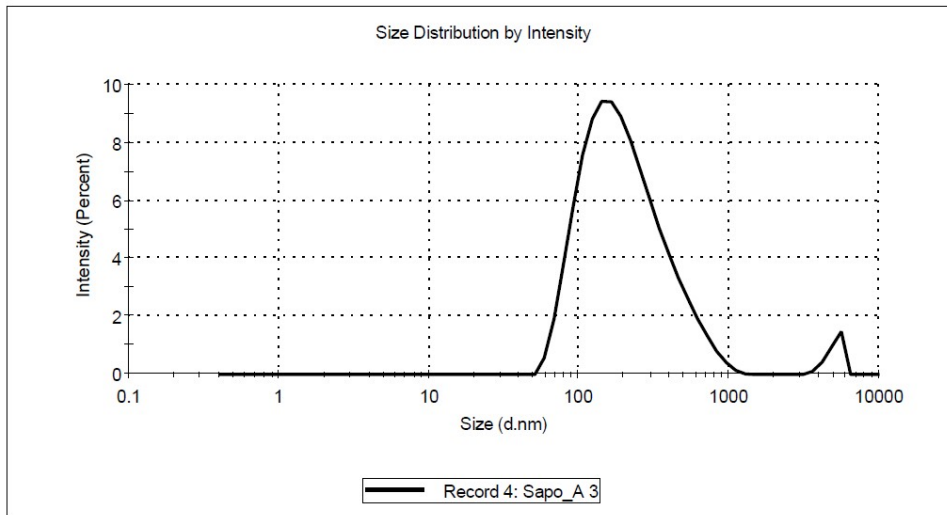

## Field Emission Scanning Electron Microscopy (FE-SEM) of Saponin in water

**Sample preparation:** 60 mg of Saponin (Sigma Aldrich (cas no: 8047-15-2) Product code: S4521) dissolved in 3 mL of DI water (Note: The saponin dissolved immediately and provided clear light brown color solution) and stirred for 5 minutes followed by lyophilization to get dry powder. This powder was used for FE-SEM, EDS, and DLS analysis to understand the effect of water.

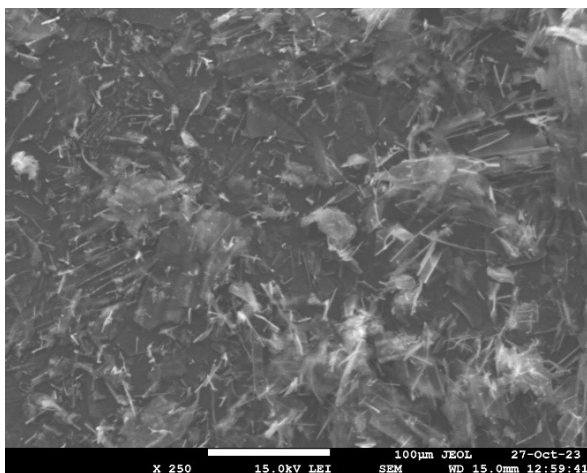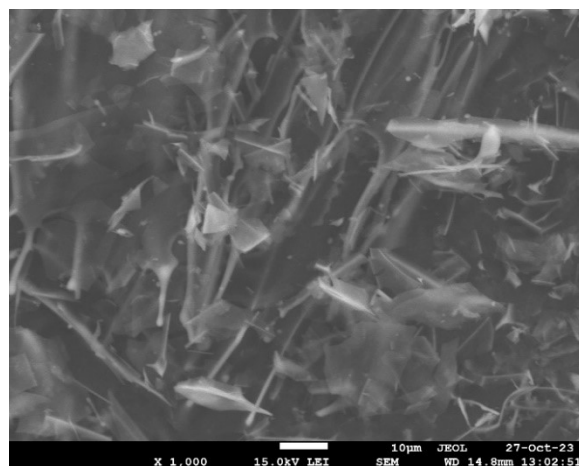

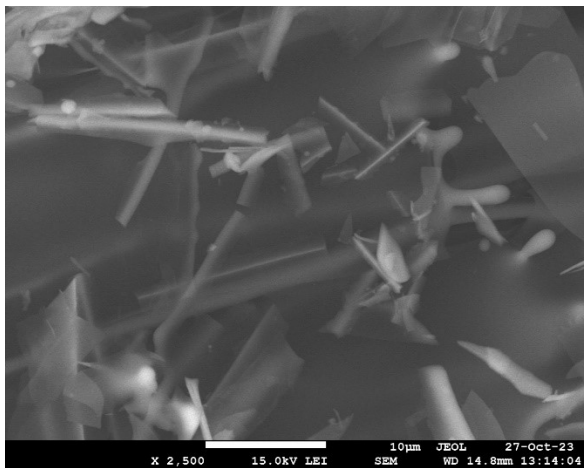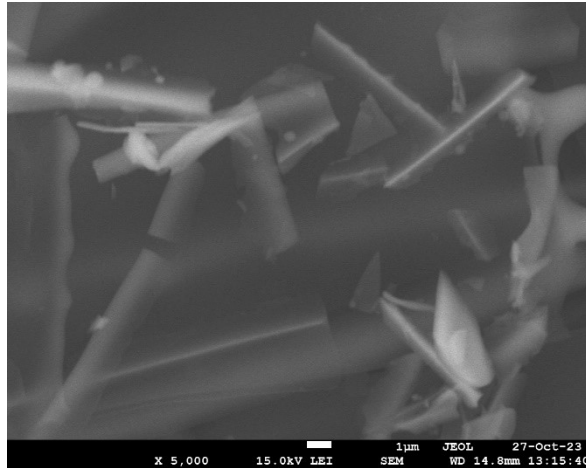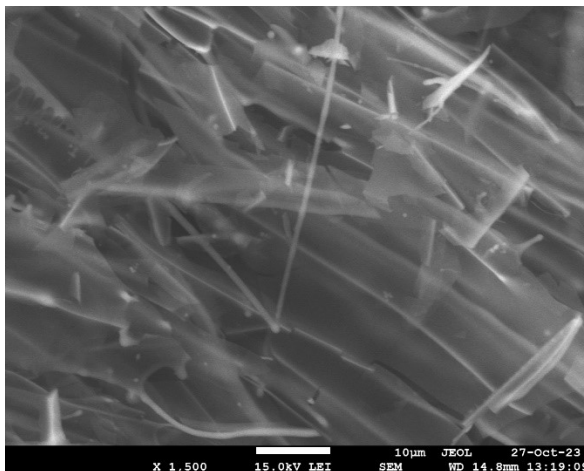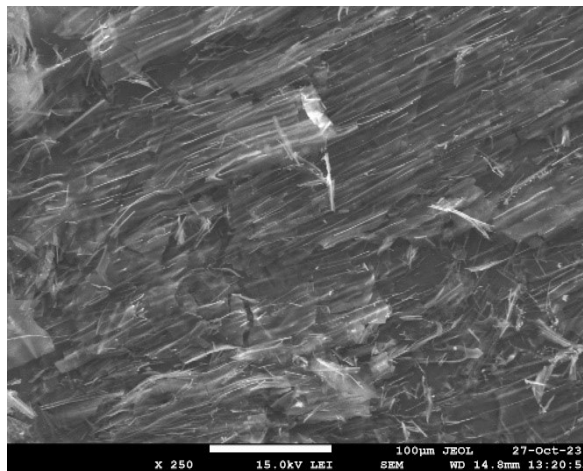

### Energy Dispersive Spectroscopy (EDS) of Saponin in water

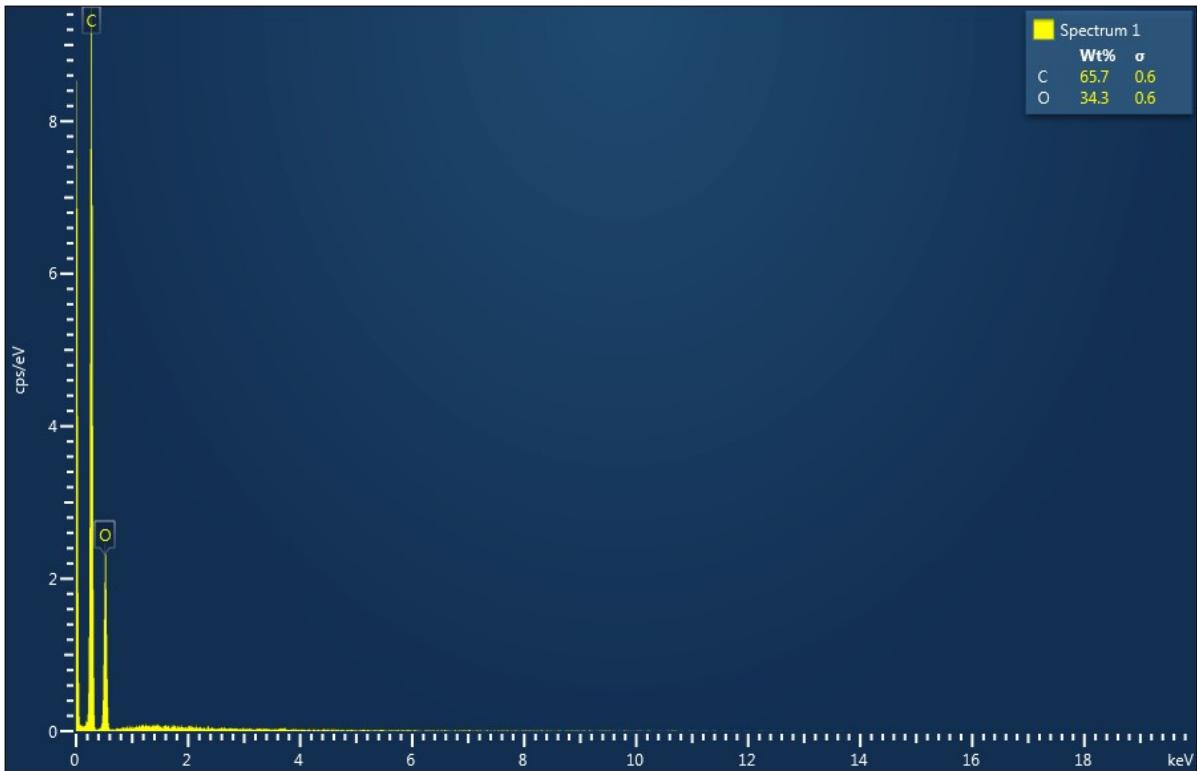

### Dynamic Light Scattering (DLS) of Saponin in water

|                                | Size (d.nm):         | % Intensity: | St Dev (d.n...) |
|--------------------------------|----------------------|--------------|-----------------|
| <b>Z-Average (d.nm):</b> 168.5 | <b>Peak 1:</b> 194.7 | 96.1         | 87.81           |
| <b>Pdl:</b> 0.346              | <b>Peak 2:</b> 5174  | 3.4          | 488.8           |
| <b>Intercept:</b> 0.952        | <b>Peak 3:</b> 32.82 | 0.5          | 5.651           |
| <b>Result quality : Good</b>   |                      |              |                 |

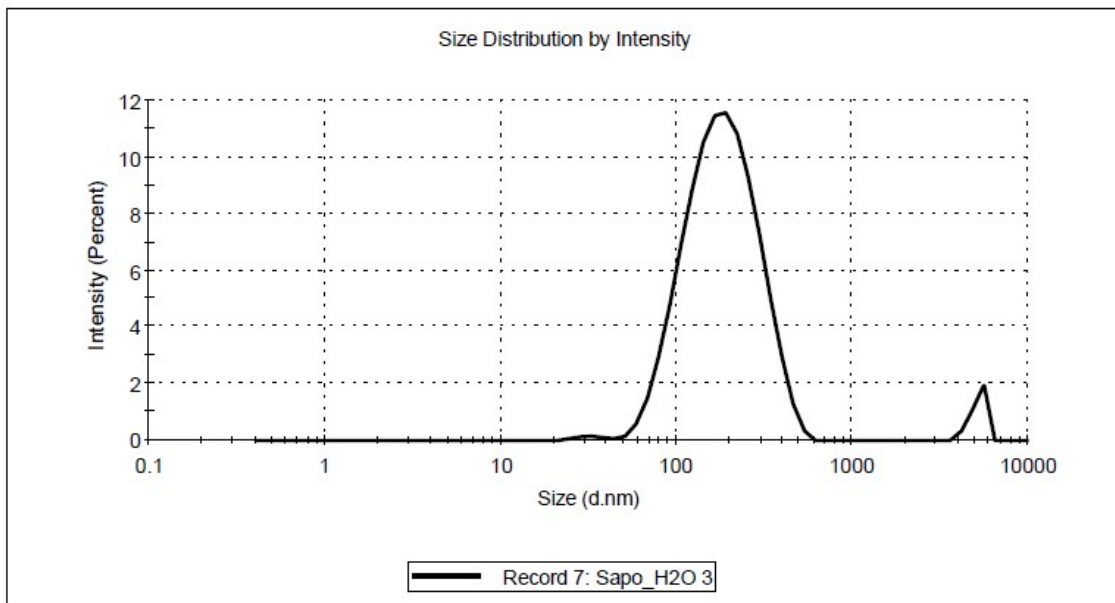



## Field Emission Scanning Electron Microscopy (FE-SEM) of Saponin and PdCl<sub>2</sub>(d/bpf) in water

**Sample preparation:** 60 mg of Saponin and 33 mg of PdCl<sub>2</sub>(d/bpf) were dissolved in 3 mL of DI water (Note: after the addition of Pd-catalyst, the solution became unclear brown color) and stirred for 5 minutes followed by lyophilization to get dry powder. This powder was used for FE-SEM, EDS, and DLS analysis.

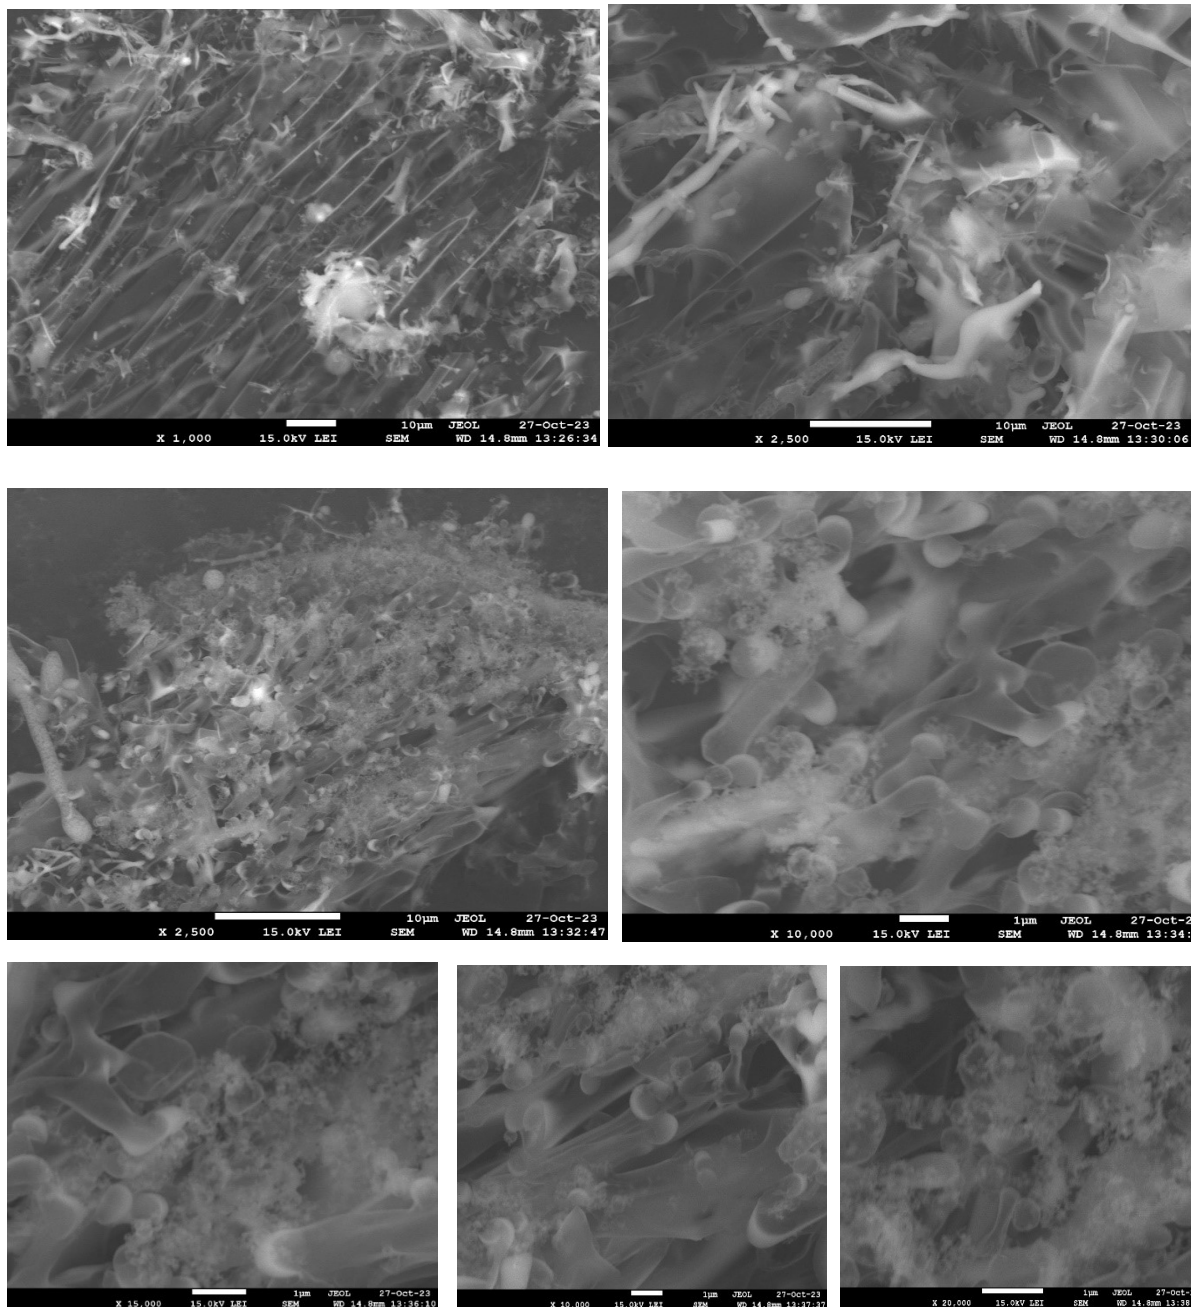

## Energy Dispersive Spectroscopy (EDS) of Saponin and PdCl<sub>2</sub>(d/bpf) in water

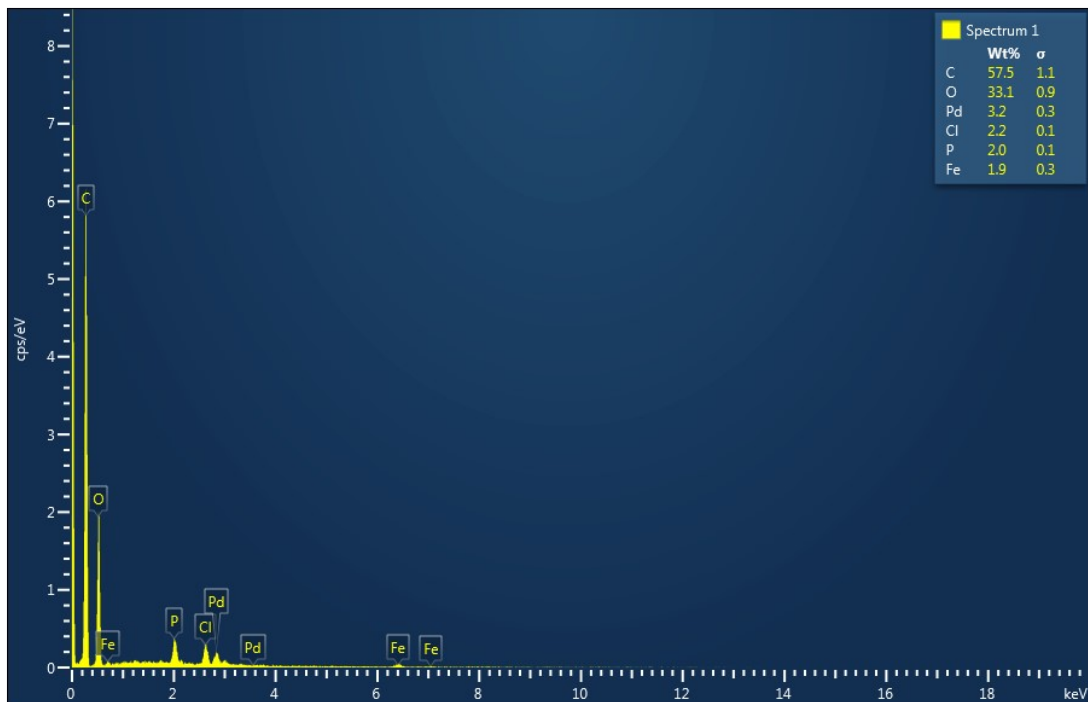

## Dynamic Light Scattering (DLS) of Saponin and PdCl<sub>2</sub>(d/bpf) in water

|                                | Size (d.nm):         | % Intensity: | St Dev (d.n...) |
|--------------------------------|----------------------|--------------|-----------------|
| <b>Z-Average (d.nm):</b> 264.6 | <b>Peak 1:</b> 304.2 | 97.5         | 179.7           |
| <b>PdI:</b> 0.368              | <b>Peak 2:</b> 5369  | 2.5          | 328.9           |
| <b>Intercept:</b> 0.973        | <b>Peak 3:</b> 0.000 | 0.0          | 0.000           |

Result quality : **Good**

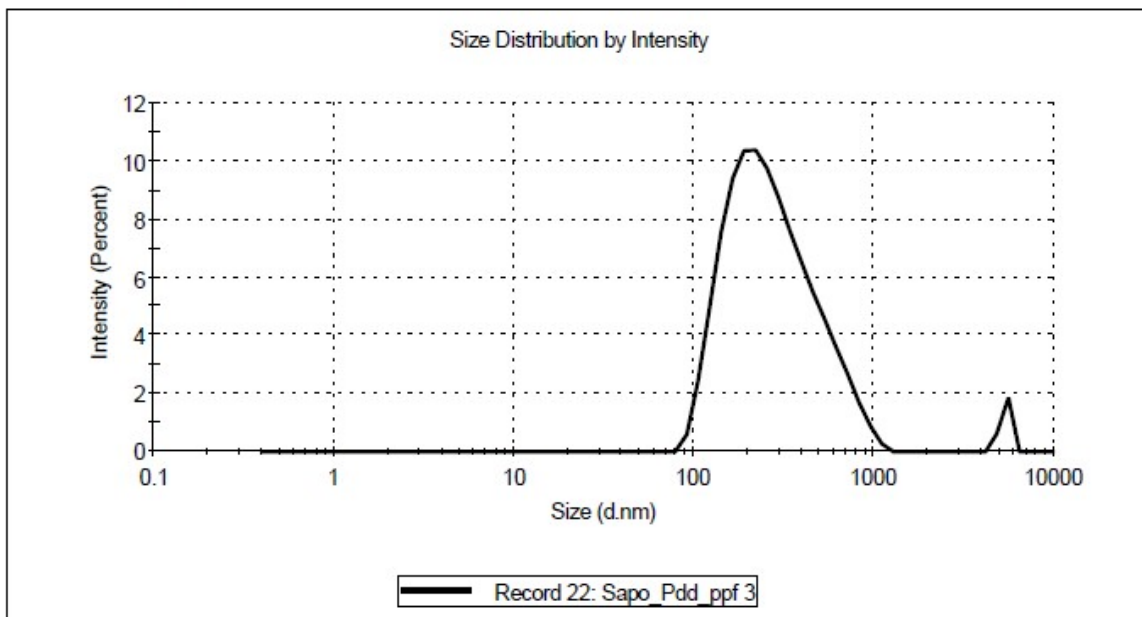

## Field Emission Scanning Electron Microscopy (FE-SEM) of Saponin and XPhos-Pd-G2 in water

**Sample preparation:** 80 mg of Saponin and 39 mg of XPhos-Pd-G2 were dissolved in 3.0 mL of DI water and 1.0 mL of THF (Note: the mixture provided unclear solution) and stirred for 5 minutes followed by lyophilization to get dry powder. This powder was used for FE-SEM, EDS, and DLS analysis.

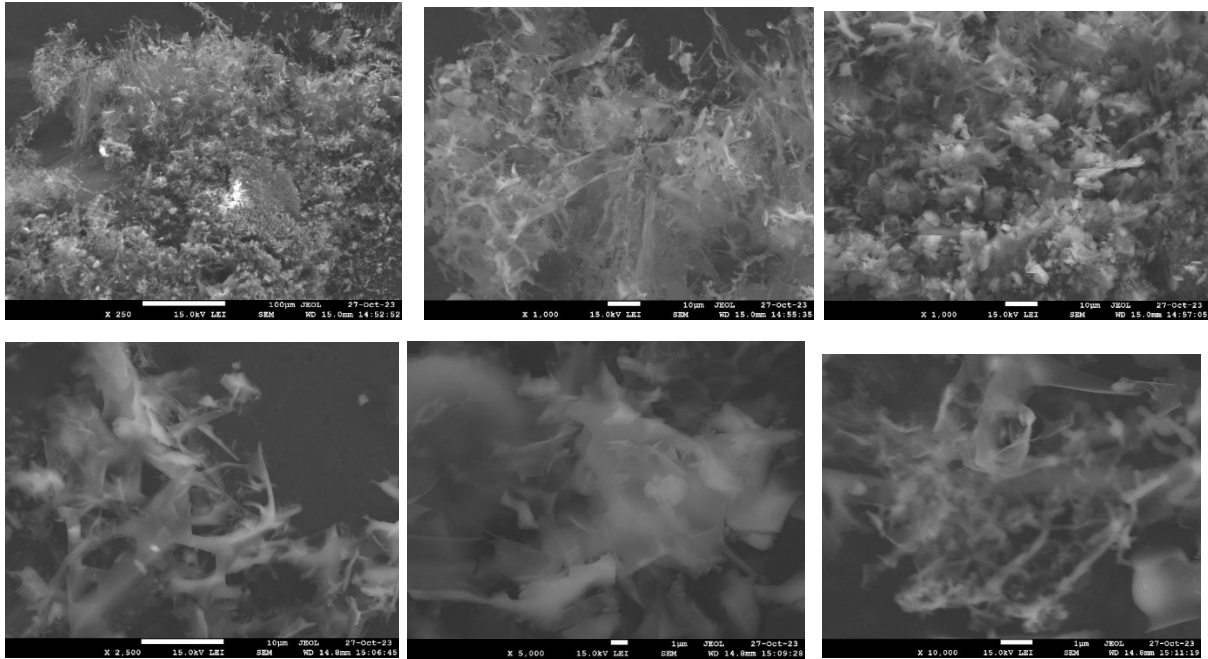

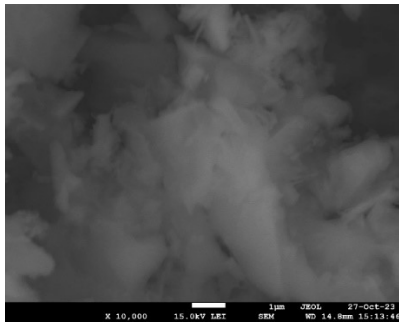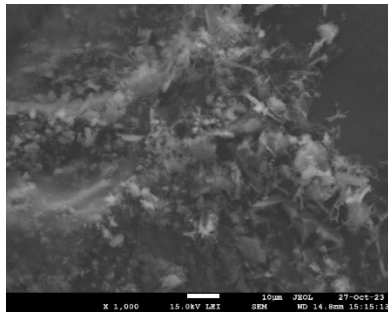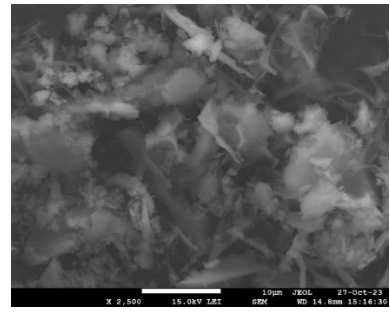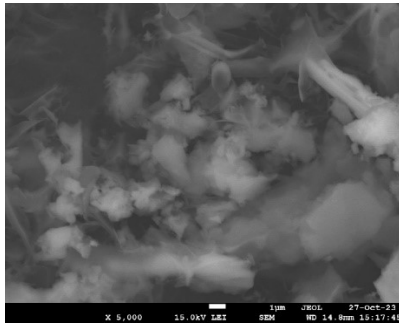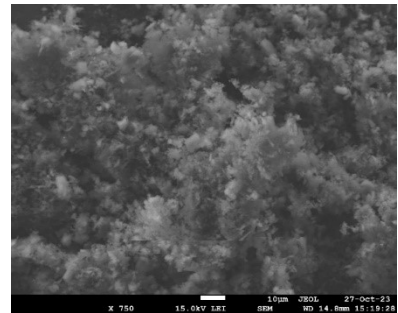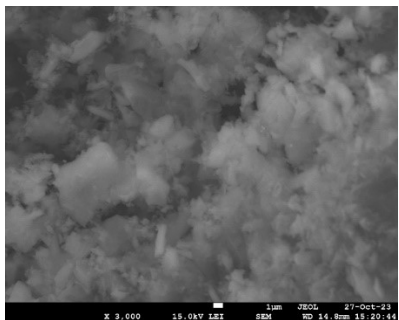

## Energy Dispersive Spectroscopy (EDS) of Saponin and XPhos-Pd-G2 in water

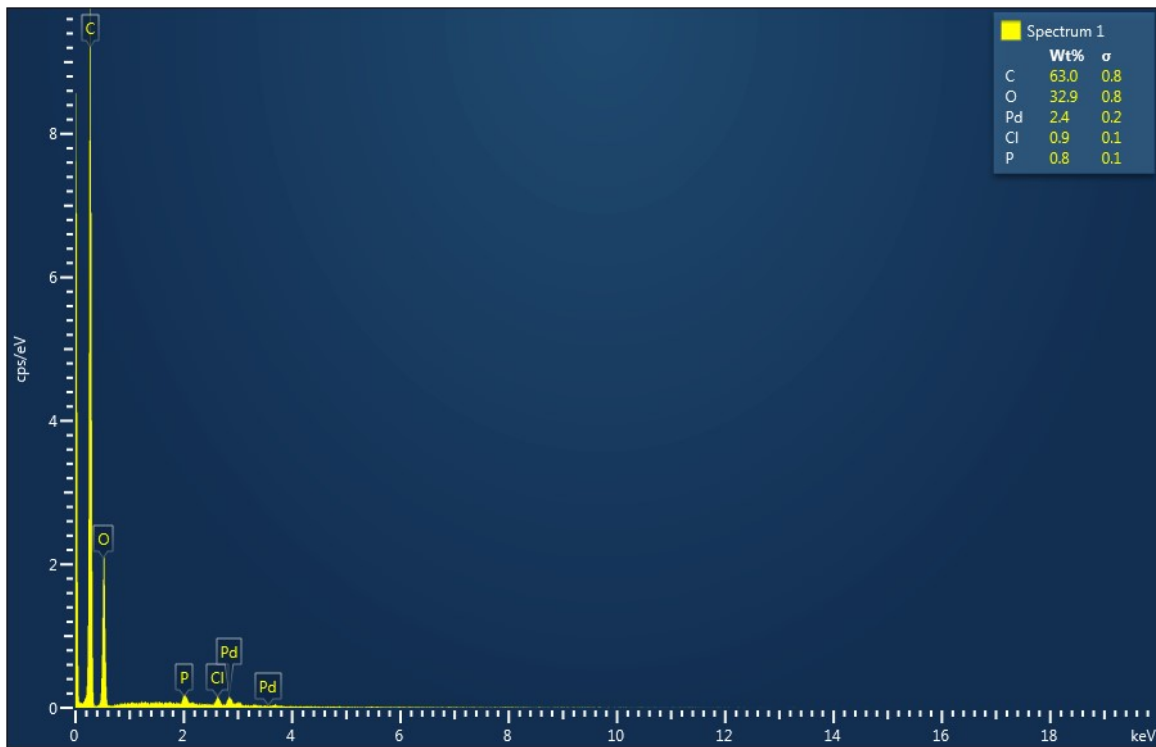

## Dynamic Light Scattering (DLS) of Saponin and XPhos-Pd-G2 in water

|                                | Size (d.nm):         | % Intensity: | St Dev (d.n...) |
|--------------------------------|----------------------|--------------|-----------------|
| <b>Z-Average (d.nm):</b> 837.5 | <b>Peak 1:</b> 564.6 | 80.0         | 115.6           |
| <b>Pdl:</b> 0.660              | <b>Peak 2:</b> 140.3 | 20.0         | 23.64           |
| <b>Intercept:</b> 0.933        | <b>Peak 3:</b> 0.000 | 0.0          | 0.000           |

**Result quality :** Refer to quality report

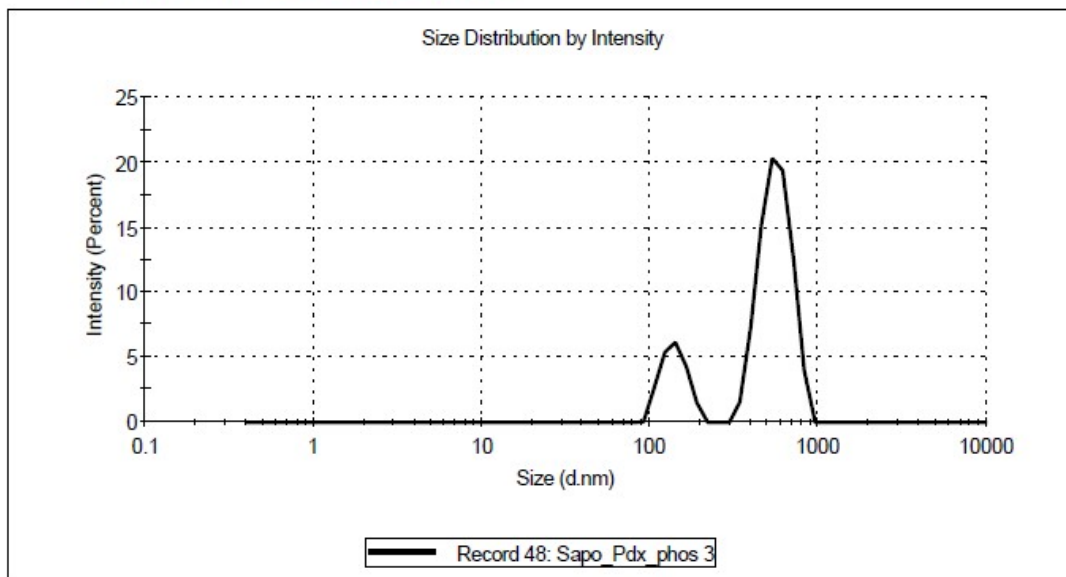

## 8. Spectral data ( $^1\text{H}$ , $^{13}\text{C}$ , and $^{19}\text{F}$ -NMR) of SMC products (3a – 3u, 4a – 4h, 5a – 5k, 6a – 6g)

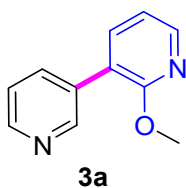

### 2-methoxy-3,3'-bipyridine (3a)<sup>1</sup>

$^1\text{H}$  NMR (400 MHz,  $\text{CDCl}_3$ )  $\delta$  8.78 (d,  $J = 1.6$  Hz, 1H), 8.58 (dd,  $J = 5.2$  Hz,  $J = 1.6$  Hz, 1H), 8.20 (dd,  $J = 4.8$  Hz,  $J = 1.6$  Hz, 1H), 7.90 (dt,  $J = 4.8$  Hz,  $J = 2.0$  Hz, 1H), 7.62 (dd,  $J = 7.2$  Hz,  $J = 2.0$  Hz, 1H), 7.36-7.33 (m, 1H), 7.01 (dd,  $J = 7.2$  Hz,  $J = 5.2$  Hz, 1H), 3.98 (s, 3H).

$^{13}\text{C}$  NMR (100 MHz,  $\text{CDCl}_3$ )  $\delta$  160.9, 149.7, 148.3, 146.6, 138.4, 136.5, 132.5, 123.0, 121.0, 117.2, 53.5.

Yield: 166 mg; 90 %

Physical appearance: High viscous oil.

Rf: 0.3 (10 % EtOAc in hexanes).

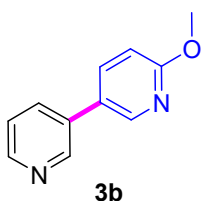

### 6-methoxy-3,3'-bipyridine (3b)<sup>2</sup>

$^1\text{H}$  NMR (400 MHz,  $\text{CDCl}_3$ )  $\delta$  8.80 (d,  $J = 1.6$  Hz, 1H), 8.60 (dd,  $J = 4.8$  Hz, 1.6 Hz, 1H), 8.39 (d,  $J = 2.0$  Hz, 1H), 7.83 – 7.77 (m, 2H), 7.38 – 7.29 (m, 1H), 6.86 (dd,  $J = 8.4$  Hz, 0.8 Hz, 1H), 4.00 (s, 3H).

$^{13}\text{C}$  NMR (100 MHz,  $\text{CDCl}_3$ )  $\delta$  164.1, 148.6, 147.8, 145.1, 137.3, 133.8, 133.5, 126.8, 123.6, 111.2, 53.6.

Yield: 160 mg; 86 %

Physical appearance: High viscous oil.

Rf: 0.3 (10 % EtOAc in hexanes).

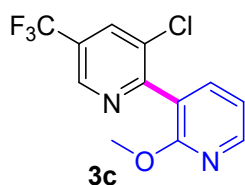

**3-chloro-2'-methoxy-5-(trifluoromethyl)-2,3'-bipyridine (3c)**

$^1\text{H}$  NMR (400 MHz,  $\text{CDCl}_3$ )  $\delta$  8.83 (dd,  $J = 2.0$  Hz, 0.8 Hz, 1H), 8.69-8.68 (m, 1H), 8.05-8.03 (m, 2H), 6.86 (dd,  $J = 8.4$  Hz, 0.8 Hz, 1H), 4.01 (s, 3H).

$^{13}\text{C}$  NMR (100 MHz,  $\text{CDCl}_3$ )  $\delta$  164.7, 148.2, 144.4 (dd,  $J = 79.0$  Hz,  $J = 4.0$  Hz), 139.6, 135.4 (q,  $J = 3.5$  Hz), 130.0, 126.8 (d,  $J = 18.0$  Hz), 126.2, 125.9 (q,  $J = 33.0$  Hz), 122.6 (d,  $J = 271$  Hz), 110.4, 53.7.

HRMS (ESI):  $m/z$  calculated for  $\text{C}_{12}\text{H}_9\text{ClF}_3\text{N}_2\text{O}$ : 289.0356;  $[\text{M}+\text{H}]^+$  found: 289.0358.

$^{19}\text{F}$  NMR (376 MHz,  $\text{CDCl}_3$ )  $\delta$  -62.25

Yield: 205 mg; 72 %

Physical appearance: High viscous oil.

Rf: 0.3 (10 % EtOAc in hexanes).

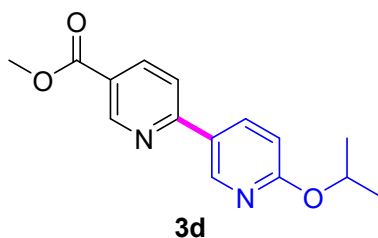

**methyl 6'-isopropoxy-[2,3'-bipyridine]-5-carboxylate (3d)**

$^1\text{H}$  NMR (400 MHz,  $\text{CDCl}_3$ )  $\delta$  9.24 (d,  $J = 2.0$  Hz, 1H), 8.80 (d,  $J = 2.0$  Hz, 1H), 8.33 – 8.27 (m, 2H), 7.73 (d,  $J = 8.4$  Hz, 1H), 6.79 (d,  $J = 8.4$  Hz, 1H), 5.38 (m, 1H), 3.97 (s, 3H), 1.38 (d,  $J = 6.0$  Hz, 6H).

$^{13}\text{C}$  NMR (100 MHz,  $\text{CDCl}_3$ )  $\delta$  165.8, 164.6, 158.7, 151.1, 146.4, 137.9, 137.5, 127.0, 123.9, 118.8, 111.7, 68.7, 52.4, 22.0.

HRMS (ESI):  $m/z$  calculated for  $\text{C}_{15}\text{H}_{17}\text{N}_2\text{O}_3$ : 273.1239;  $[\text{M}+\text{H}]^+$  found: 273.1241.

Yield: 200 mg; 74 %

Physical appearance: High viscous oil.

Rf: 0.25 (10 % EtOAc in hexanes).

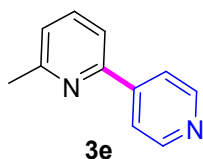

### 6-methyl-2,4'-bipyridine (3e)<sup>3</sup>

<sup>1</sup>H NMR (400 MHz, CDCl<sub>3</sub>) δ 8.70 (dd, *J* = 4.4 Hz, *J* = 1.6 Hz, 2H), 7.88 (dd, *J* = 4.4 Hz, *J* = 1.6 Hz, 2H), 7.69 (t, *J* = 7.6 Hz, 1H), 7.58 (d, *J* = 8.0 Hz, 1H), 7.19 (d, *J* = 8.0 Hz, 1H), 2.64 (s, 3H).

<sup>13</sup>C NMR (100 MHz, CDCl<sub>3</sub>) δ 159.02, 154.0, 150.2, 146.7, 137.1, 123.3, 121.1, 117.9, 24.6.

Yield: 150 mg; 88 %

Physical appearance: High viscous oil.

Rf: 0.3 (85 % EtOAc in hexanes).

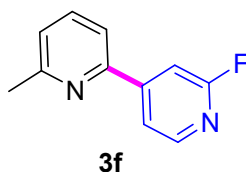

### 2-fluoro-6-methyl-2,4'-bipyridine (3f)<sup>4</sup>

<sup>1</sup>H NMR (400 MHz, CDCl<sub>3</sub>) δ 8.28 (d, *J* = 5.2 Hz, 1H), 7.77-7.75 (m, 1H), 7.70 (d, *J* = 7.6 Hz, 1H), 7.57 (d, *J* = 8.0 Hz, 2H), 7.22 (d, *J* = 7.6 Hz, 1H), 2.63 (s, 3H).

<sup>13</sup>C NMR (100 MHz, CDCl<sub>3</sub>) δ 164.7 (d, *J* = 236 Hz), 159.1, 152.6 (d, *J* = 3.7 Hz), 152.4 (d, *J* = 8.1 Hz), 148.0 (d, *J* = 15.0 Hz), 137.2, 123.9, 118.9 (d, *J* = 4.0 Hz), 118.0, 106.9 (d, *J* = 39.0 Hz), 24.6.

<sup>19</sup>F NMR (376 MHz, CDCl<sub>3</sub>) δ -68.08

Yield: 165 mg; 88 %

Physical appearance: High viscous oil.

Rf: 0.3 (10 % EtOAc in hexanes).



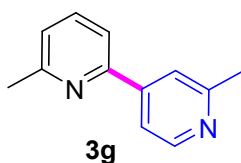

### 2',6-dimethyl-2,4'-bipyridine (3g)

$^1\text{H}$  NMR (400 MHz,  $\text{CDCl}_3$ )  $\delta$  8.57 (d,  $J = 5.2$  Hz, 1H), 7.77 (s, 1H), 7.69-7.64 (m, 2H), 7.56 (d,  $J = 7.6$  Hz, 1H), 7.19-7.17 (m, 1H), 2.64 (s, 6H).

$^{13}\text{C}$  NMR (100 MHz,  $\text{CDCl}_3$ )  $\delta$  159.0, 158.9, 154.3, 149.5, 147.1, 137.1, 123.2, 120.7, 118.3, 118.0, 24.6, 24.5.

HRMS (ESI):  $m/z$  calculated for  $\text{C}_{12}\text{H}_{13}\text{N}_2$ : 185.1079;  $[\text{M}+\text{H}]^+$  found: 185.1102.

Yield: 168 mg; 92 %

Physical appearance: High viscous oil.

Rf: 0.3 (10 % EtOAc in hexanes).

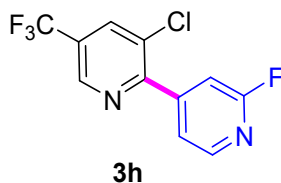

### 3-chloro-6'-fluoro-5-(trifluoromethyl)-2,3'-bipyridine (3h)

$^1\text{H}$  NMR (400 MHz,  $\text{CDCl}_3$ )  $\delta$  8.89 (d,  $J = 1.2$  Hz, 1H), 8.38 (d,  $J = 5.2$  Hz, 1H), 8.11 (d,  $J = 1.2$  Hz, 1H), 7.59 (dt,  $J = 5.2$  Hz, 1.2 Hz, 1H), 7.35 (s, 1H).

$^{13}\text{C}$  NMR (100 MHz,  $\text{CDCl}_3$ )  $\delta$  163.7 (d,  $J = 237.0$  Hz), 155.9, 149.5 (d,  $J = 8.1$  Hz), 147.9 (d,  $J = 15.1$  Hz), 144.6 (q,  $J = 38.0$  Hz), 135.8 (q,  $J = 36.0$  Hz), 130.5, 127.7 (q,  $J = 34.0$  Hz), 122.3 (q,  $J = 271$  Hz), 121.5 (d,  $J = 4.3$  Hz), 110.2 (d,  $J = 39.0$  Hz).

$^{19}\text{F}$  NMR (376 MHz,  $\text{CDCl}_3$ )  $\delta$  -62.39, -66.71

HRMS (ESI):  $m/z$  calculated for  $\text{C}_{11}\text{H}_6\text{ClF}_4\text{N}_2$ : 277.0156;  $[\text{M}+\text{H}]^+$  found: 277.0159.

Yield: 204 mg; 74 %

Physical appearance: High viscous oil.

Rf: 0.25 (10 % EtOAc in hexanes).

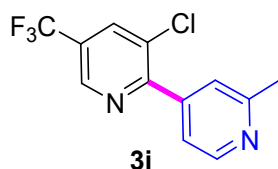

**3-chloro-6'-methyl-5-(trifluoromethyl)-2,3'-bipyridine (3i)**

<sup>1</sup>H NMR (400 MHz, CDCl<sub>3</sub>) δ 8.87 - 8.86 (m, 1H), 8.65 (d, *J* = 5.2 Hz, 1H), 8.08 (d, *J* = 1.2 Hz, 1H), 7.51 (s, 1H), 7.47 (dd, *J* = 5.2 Hz, 1.2 Hz 1H), 2.66 (s, 3H).

<sup>13</sup>C NMR (100 MHz, CDCl<sub>3</sub>) δ 158.9, 157.6, 149.2, 144.6, 144.5 (q, *J* = 3.8 Hz), 135.5 (q, *J* = 3.5 Hz), 130.5, 127.1 (q, *J* = 33.6 Hz), 123.1, 122.4 (q, *J* = 271 Hz), 120.7, 24.5.

<sup>19</sup>F NMR (376 MHz, CDCl<sub>3</sub>) δ -62.31

HRMS (ESI): *m/z* calculated for C<sub>12</sub>H<sub>9</sub>ClF<sub>3</sub>N<sub>2</sub>: 273.0406; [M+H]<sup>+</sup> found: 273.0409.

Yield: 213 mg; 79 %

Physical appearance: High viscous oil.

Rf: 0.25 (10 % EtOAc in hexanes).

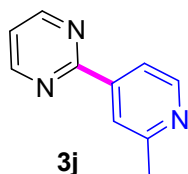

**2-(2-methylpyridin-4-yl)pyrimidine (3j)**

<sup>1</sup>H NMR (400 MHz, CDCl<sub>3</sub>) δ 8.87 (d, *J* = 4.8 Hz, 2H), 8.66 (d, *J* = 5.2 Hz, 1H), 8.16 (d, *J* = 1.2 Hz, 1H), 8.09 (dd, *J* = 5.2 Hz, 1.2 Hz, 1H), 7.31 (t, *J* = 4.8 Hz, 1H), 2.67 (s, 3H).

<sup>13</sup>C NMR (100 MHz, CDCl<sub>3</sub>) δ 163.0, 159.4, 157.5, 149.9, 145.1, 121.5, 120.5, 119.1, 24.6.

HRMS (ESI): *m/z* calculated for C<sub>10</sub>H<sub>10</sub>N<sub>3</sub>: 172.0875; [M+H]<sup>+</sup> found: 172.0874.

Yield: 139 mg; 82 %

Physical appearance: High viscous oil.

Rf: 0.2 (10 % EtOAc in hexanes).

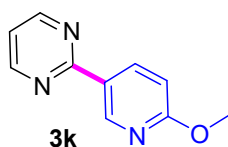

### 5-(6-methoxypyridin-3-yl)pyrimidine (3k)

$^1\text{H}$  NMR (400 MHz,  $\text{CDCl}_3$ )  $\delta$  9.24 (d,  $J = 2.4$  Hz, 1H), 8.76 (d,  $J = 4.8$  Hz, 2H), 8.58 (dd,  $J = 8.8$  Hz, 2.4 Hz, 1H), 7.16 (t,  $J = 4.8$  Hz, 1H), 6.83 (dd,  $J = 8.8$  Hz, 0.4 Hz, 1H), 4.02 (s, 3H).

$^{13}\text{C}$  NMR (100 MHz,  $\text{CDCl}_3$ )  $\delta$  165.7, 163.2, 157.2, 148.0, 138.2, 126.9, 118.9, 110.6, 53.8.

HRMS (ESI):  $m/z$  calculated for  $\text{C}_{10}\text{H}_9\text{N}_3\text{O}$ : 188.0824;  $[\text{M}+\text{H}]^+$  found: 188.0822.

Yield: 165 mg; 88 %

Physical appearance: High viscous oil.

Rf: 0.2 (10 % EtOAc in hexanes).

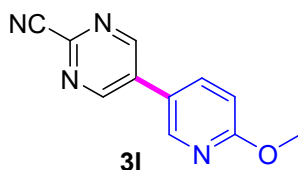

### 5-(6-methoxypyridin-3-yl)pyrimidine-2-carbonitrile (3l)

$^1\text{H}$  NMR (400 MHz,  $\text{CDCl}_3$ )  $\delta$  9.01 (s, 2H), 8.45 (d,  $J = 2.8$  Hz, 1H), 7.83 (dd,  $J = 8.8$  Hz, 2.8 Hz, 1H), 6.94 (d,  $J = 8.8$  Hz, 1H), 4.02 (s, 3H).

$^{13}\text{C}$  NMR (100 MHz,  $\text{CDCl}_3$ )  $\delta$  165.4, 155.0, 145.8, 143.4, 136.9, 133.7, 123.6, 115.7, 112.3, 54.0.

HRMS (ESI):  $m/z$  calculated for  $\text{C}_{11}\text{H}_9\text{N}_4\text{O}$ : 213.0776;  $[\text{M}+\text{H}]^+$  found: 213.0776.

Yield: 143 mg; 68 %

Physical appearance: High viscous oil.

Rf: 0.15 (10 % EtOAc in hexanes).

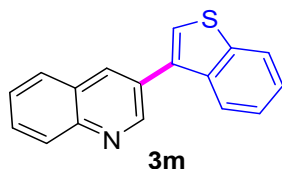

### 3-(benzo[b]thiophen-3-yl)quinoline (3m)

$^1\text{H}$  NMR (400 MHz,  $\text{CDCl}_3$ )  $\delta$  9.16 (d,  $J = 2.0$  Hz, 1H), 8.34 (d,  $J = 2.0$  Hz, 1H), 8.18 (d,  $J = 8.4$  Hz, 1H), 7.98 – 7.88 (m, 3H), 7.78 – 7.74 (m, 1H), 7.63 – 7.60 (m, 2H), 7.57 – 7.41 (m, 2H).

$^{13}\text{C}$  NMR (100 MHz,  $\text{CDCl}_3$ )  $\delta$  150.9, 147.4, 140.7, 137.7, 34.8, 134.4, 129.6, 129.4, 128.0, 127.9, 127.7, 127.2, 125.1, 124.86, 124.82, 123.1, 122.4.

HRMS (ESI):  $m/z$  calculated for  $\text{C}_{17}\text{H}_{12}\text{NS}$ : 262.069;  $[\text{M}+\text{H}]^+$  found: 262.0693.

Yield: 199 mg; 76 %

Physical appearance: off-white solid.

Rf: 0.3 (10 % EtOAc in hexanes).

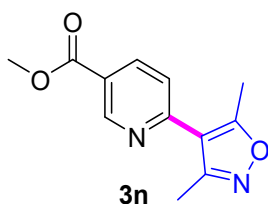

### methyl 6-(3,5-dimethylisoxazol-4-yl)nicotinate (3n)

$^1\text{H}$  NMR (400 MHz,  $\text{CDCl}_3$ )  $\delta$  9.26 (dd,  $J = 2.0, 0.8$  Hz, 1H), 8.33 (dd,  $J = 8.2$  Hz, 2.0 Hz, 1H), 7.42 (dd,  $J = 8.2$  Hz, 0.8 Hz, 1H), 3.98 (s, 3H), 2.63 (s, 3H), 2.47 (s, 3H).

$^{13}\text{C}$  NMR (100 MHz,  $\text{CDCl}_3$ )  $\delta$  168.7, 165.6, 158.6, 154.7, 151.0, 137.6, 123.7, 121.8, 115.5, 52.4, 12.8, 11.8.

HRMS (ESI):  $m/z$  calculated for  $\text{C}_{12}\text{H}_{13}\text{N}_2\text{O}_3$ : 233.0926;  $[\text{M}+\text{H}]^+$  found: 233.0926.

Yield: 180 mg; 77 %

Physical appearance: off-white solid.

Rf: 0.25 (10 % EtOAc in hexanes).

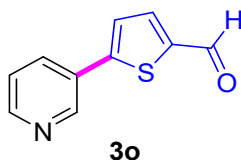

**5-(pyridin-3-yl) thiophene-2-carbaldehyde (3o)<sup>5</sup>**

<sup>1</sup>H NMR (400 MHz, CDCl<sub>3</sub>) δ 9.92 (s, 1H), 8.94 (d, *J* = 1.6 Hz, 1H), 8.62 (dd, *J* = 4.8 Hz, 1.6 Hz, 1H), 7.95-7.92 (m, 1H), 7.79 (d, *J* = 4.0 Hz, 1H), 7.47 (d, *J* = 4.0 Hz, 1H), 7.40-7.36 (m, 1H).

<sup>13</sup>C NMR (100 MHz, CDCl<sub>3</sub>) δ 182.7, 150.2, 149.9, 147.2, 143.6, 137.2, 133.6, 129.1, 125.1, 123.8.

Yield: 156 mg; 84 %

Physical appearance: off-white solid.

Rf: 0.25 (10 % EtOAc in hexanes).

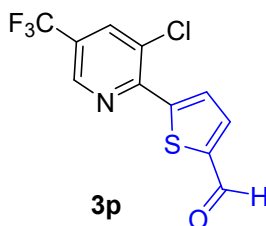

**5-(3-chloro-5-(trifluoromethyl)pyridine-2-yl)thiophene-2-carbaldehyde (3p)**

<sup>1</sup>H NMR (400 MHz, CDCl<sub>3</sub>) δ 9.99 (s, 1H), 8.79 (d, *J* = 0.8 Hz, 1H), 8.25 (d, *J* = 4.0 Hz, 1H), 8.04 (d, *J* = 0.8 Hz, 1H), 7.80 (d, *J* = 4.0 Hz, 1H),

<sup>13</sup>C NMR (100 MHz, CDCl<sub>3</sub>) δ 183.3, 151.1, 149.0, 145.9, 144.2 (q, *J* = 8.0 Hz), 136.3 (q, *J* = 7.0 Hz), 135.9, 130.8, 128.7, 126.3 (q, *J* = 68.0 Hz), 122.4 (q, *J* = 542.0 Hz), 121.0.

<sup>19</sup>F NMR (376 MHz, CDCl<sub>3</sub>) δ -62.31.

HRMS (ESI): *m/z* calculated for C<sub>11</sub>H<sub>6</sub>ClF<sub>3</sub>NOS: 291.9811; [M+H]<sup>+</sup> found: 291.9815.

Yield: 206 mg; 72 %

Physical appearance: Off-white semi-solid.

Rf: 0.2 (10 % EtOAc in hexanes).

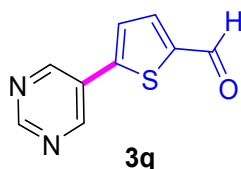

**5-(pyrimidine-5-yl)thiophene-2-carbaldehyde (3q)**

<sup>1</sup>H NMR (400 MHz, CDCl<sub>3</sub>) δ 9.96 (s, 1H), 9.23 (s, 1H), 9.03 (s, 2H), 7.83 (d, *J* = 4.0 Hz, 1H), 7.52 (d, *J* = 4.0 Hz, 1H).

<sup>13</sup>C NMR (100 MHz, CDCl<sub>3</sub>) δ 177.8, 153.9, 149.2, 140.6, 135.9, 132.2, 122.8, 121.3.

HRMS (ESI): *m/z* calculated for C<sub>9</sub>H<sub>7</sub>N<sub>2</sub>OS: 191.0279; [M+H]<sup>+</sup> found: 191.0265.

Yield: 142 mg; 75 %

Physical appearance: Off-white solid.

Rf: 0.2 (10 % EtOAc in hexanes).

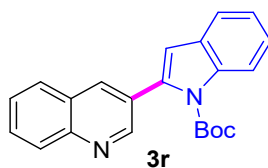

**tert-butyl 2-(quinolin-3-yl)-1H-indole-1-carboxylate (3r)<sup>6</sup>**

<sup>1</sup>H NMR (400 MHz, CDCl<sub>3</sub>) δ 8.97 (d, *J* = 2.0 Hz, 1H), 8.27 (d, *J* = 8.4 Hz, 1H), 8.19 (d, *J* = 2.0 Hz, 1H), 8.14 (d, *J* = 8.4 Hz, 1H), 7.86 (d, *J* = 8.4 Hz, 1H), 7.63 (m, 2H), 7.40 (m, 1H), 7.39 (m, 1H), 7.29 (m, 1H), 6.72 (m, 1H), 1.30 (s, 9H).

<sup>13</sup>C NMR (100 MHz, CDCl<sub>3</sub>) δ 151.1, 150.0, 146.9, 137.5, 136.9, 134.1, 129.6, 129.3, 129.1, 128.4, 127.8, 127.4, 127.1, 125.0, 123.3, 120.7, 115.7, 111.8, 84.2, 27.7.

Yield: 286 mg; 84 %

Physical appearance: White solid.

Rf: 0.2 (10 % EtOAc in hexanes).

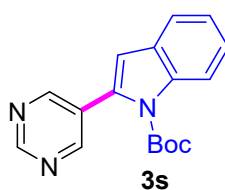

**tert-butyl 2-(pyrimidin-5-yl)-1H-indole-1-carboxylate (3s)**

$^1\text{H}$  NMR (400 MHz,  $\text{CDCl}_3$ )  $\delta$  9.20 (s, 1H), 8.81 (s, 2H), 8.24 (d,  $J = 8.0$  Hz, 1H), 7.60 (d,  $J = 8.0$  Hz, 1H), 7.42 – 7.38 (m, 1H), 7.32 – 7.28 (m, 1H), 6.69 (s, 1H), 1.42 (s, 9H).

$^{13}\text{C}$  NMR (100 MHz,  $\text{CDCl}_3$ )  $\delta$  157.3, 156.0, 149.7, 137.6, 132.9, 129.4, 128.8, 125.5, 123.5, 120.9, 115.8, 112.5, 84.7, 27.8.

HRMS (ESI):  $m/z$  calculated for  $\text{C}_{17}\text{H}_{18}\text{N}_3\text{O}_2$ : 296.1399;  $[\text{M}+\text{H}]^+$  found: 296.1401.

Yield: 210 mg; 72 %

Physical appearance: High viscous oil.

Rf: 0.2 (10 % EtOAc in hexanes).

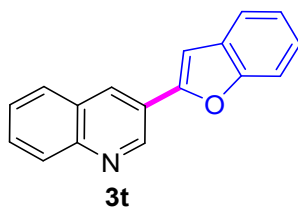

**3-(benzofuran-2-yl)quinoline (3t)<sup>7</sup>**

$^1\text{H}$  NMR (400 MHz,  $\text{CDCl}_3$ )  $\delta$  9.34 (d,  $J = 2.4$  Hz, 1H), 8.56 (d,  $J = 2.4$  Hz, 1H), 8.11 (d,  $J = 8.0$  Hz, 1H), 7.88 (dd,  $J = 8.0$  Hz, 2.4 Hz, 1H), 7.72 – 7.69 (m, 1H), 7.65 – 7.61 (m, 1H), 7.57 – 7.47 (m, 2H), 7.35 – 7.25 (m, 2H), 7.24 (s, 1H).

$^{13}\text{C}$  NMR (100 MHz,  $\text{CDCl}_3$ )  $\delta$  155.4, 153.2, 147.6, 147.5, 130.7, 129.8, 129.4, 128.9, 128.2, 127.7, 127.4, 125.0, 123.7, 123.3, 121.3, 111.3, 103.0,

Yield: 190 mg; 78 %

Physical appearance: Off-white solid.

Rf: 0.2 (20 % EtOAc in hexanes).

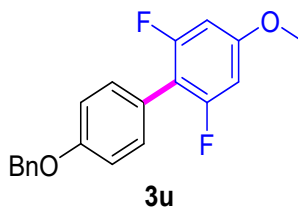

**4'-(benzyloxy)-2,6-difluoro-4-methoxy-1,1'-biphenyl (3u)**

$^1\text{H}$  NMR (400 MHz,  $\text{CDCl}_3$ )  $\delta$  7.46 – 7.29 (m, 7H), 7.04 (d,  $J = 8.8$  Hz, 2H), 6.53 (d,  $J = 8.8$  Hz, 2H), 5.10 (s, 2H), 3.82 (s, 3H).

$^{13}\text{C}$  NMR (100 MHz,  $\text{CDCl}_3$ )  $\delta$  160.8 (d,  $J = 10.0$  Hz), 158.5 (t,  $J = 14.1$  Hz), 158.4, 157.3, 135.8, 130.4, 127.5, 126.9, 126.4, 120.6, 113.5, 109.5 (d,  $J = 19.4$  Hz), 97.0 (d,  $J = 30.1$  Hz), 97.0 (d,  $J = 11.9$  Hz), 68.9, 54.7.

$^{19}\text{F}$  NMR (376 MHz,  $\text{CDCl}_3$ )  $\delta$  -113.79

HRMS (ESI):  $m/z$  calculated for  $\text{C}_{20}\text{H}_{17}\text{F}_2\text{O}_2$ : 327.1197;  $[\text{M}+\text{H}]^+$  found: 327.1206.

Yield: 282 mg; 86 %

Physical appearance: off-white solid.

Rf: 0.2 (20 % EtOAc in hexanes).

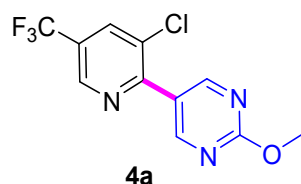

#### 5-(3-chloro-5-(trifluoromethyl)pyridine-2-yl)-2-methoxy pyrimidine (4a)

$^1\text{H}$  NMR (400 MHz,  $\text{CDCl}_3$ )  $\delta$  9.04 (s, 2H), 8.87 (d,  $J = 1.6$  Hz, 1H), 8.07 (d,  $J = 1.6$  Hz), 4.11 (s, 3H).

$^{13}\text{C}$  NMR (100 MHz,  $\text{CDCl}_3$ )  $\delta$  165.6, 160.0, 154.3, 144.7 (q,  $J = 8.0$  Hz), 135.5 (q,  $J = 7.0$  Hz), 130.2, 126.5 (q,  $J = 34.0$  Hz), 124.7, 123.8, 55.4.

HRMS (ESI):  $m/z$  calculated for  $\text{C}_{11}\text{H}_8\text{ClF}_3\text{N}_3\text{O}$ : 290.0308;  $[\text{M}+\text{H}]^+$  found: 290.0311.

$^{19}\text{F}$  NMR (376 MHz,  $\text{CDCl}_3$ )  $\delta$  -62.28

Yield: 206 mg; 72 %

Physical appearance: High viscous oil.

Rf: 0.3 (20 % EtOAc in hexanes).

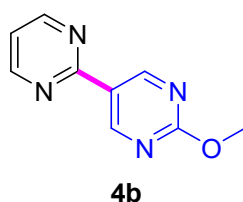



### 2'-methoxy-2,5'-bipyrimidine (4b)<sup>8</sup>

<sup>1</sup>H NMR (400 MHz, CDCl<sub>3</sub>) δ 9.49 (s, 2H), 8.80 (d, *J* = 4.8 Hz, 2H), 7.24 (t, *J* = 4.8 Hz, 1H), 4.11 (s, 3H).

<sup>13</sup>C NMR (100 MHz, CDCl<sub>3</sub>) δ 166.7, 161.3, 159.6, 157.4, 125.2, 119.6, 55.3.

Yield: 144 mg; 77 %

Physical appearance: Off-white solid.

Rf: 0.3 (15 % EtOAc in hexanes).

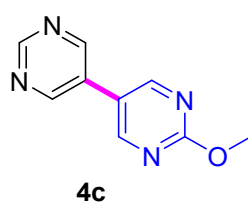

### 2-methoxy-5,5'-bipyrimidine (4c)

<sup>1</sup>H NMR (400 MHz, CDCl<sub>3</sub>) δ 9.28 (s, 1H), 8.93 (s, 2H), 8.76 (s, 2H), 4.10 (s, 3H).

<sup>13</sup>C NMR (100 MHz, CDCl<sub>3</sub>) δ 166.0, 158.3, 157.4, 154.4, 128.6, 122.0, 55.3.

HRMS (ESI): *m/z* calculated for C<sub>9</sub>H<sub>9</sub>N<sub>4</sub>O: 189.0776; [M+H]<sup>+</sup> found: 189.0771.

Yield: 152 mg; 81 %

Physical appearance: Semi-solid.

Rf: 0.3 (15 % EtOAc in hexanes).

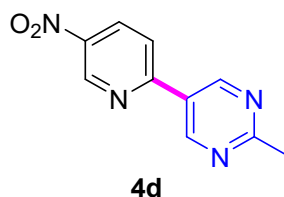

### 2-methyl-5-(5-nitropyridin-2-yl)pyrimidine (4d)

<sup>1</sup>H NMR (400 MHz, CDCl<sub>3</sub>) δ 9.54 (d, *J* = 2.8 Hz, 1H), 9.33 (s, 2H), 8.62 (dd, *J* = 8.8 Hz, 2.8 Hz, 1H), 7.60 (d, *J* = 8.8 Hz, 1H), 2.85 (s, 3H).

<sup>13</sup>C NMR (100 MHz, CDCl<sub>3</sub>) δ 170.0, 157.6, 155.8, 145.7, 143.5, 132.4, 127.4, 119.9, 26.1.

HRMS (ESI): *m/z* calculated for C<sub>10</sub>H<sub>9</sub>N<sub>4</sub>O<sub>2</sub>: 217.0726; [M+H]<sup>+</sup> found: 217.0726.

Yield: 157 mg; 74 %

Physical appearance: High viscous oil.

Rf: 0.3 (20 % EtOAc in hexanes).

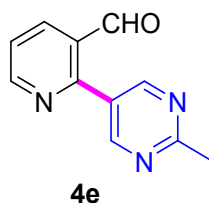

### 2-(2-methylpyrimidin-5-yl)nicotinaldehyde (4e)

$^1\text{H}$  NMR (400 MHz,  $\text{CDCl}_3$ )  $\delta$  10.12 (s, 1H), 8.94 (dd,  $J = 4.8$  Hz, 1.6 H, 1H), 8.90 (s, 2H), / integrate in spectra/ Ravi) 8.37 (dd,  $J = 7.6$  Hz, 1.6 Hz, 1H), 7.55 (dd,  $J = 7.6$  Hz, 0.8 Hz, 1H), 2.86 (s, 3H).

$^{13}\text{C}$  NMR (100 MHz,  $\text{CDCl}_3$ )  $\delta$  189.8, 168.9, 157.6, 155.9, 154.1, 137.1, 129.9, 127.9, 123.6, 26.0.

HRMS (ESI):  $m/z$  calculated for  $\text{C}_{11}\text{H}_{10}\text{N}_3\text{O}$ : 200.0824;  $[\text{M}+\text{H}]^+$  found: 200.0823.

Yield: 125 mg; 63 %

Physical appearance: High viscous oil.

Rf: 0.3 (20 % EtOAc in hexanes).

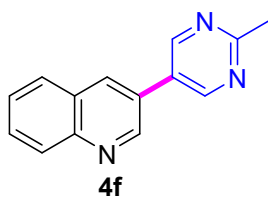

### 3-(2-methylpyrimidin-5-yl)quinoline (4f)

$^1\text{H}$  NMR (400 MHz,  $\text{CDCl}_3$ )  $\delta$  9.13 (d,  $J = 2.0$  Hz, 1H), 8.99 (s, 2H), 8.34 (d,  $J = 2.0$  Hz, 1H), 8.18 (d,  $J = 8.4$  Hz, 1H), 7.93 (d,  $J = 8.4$  Hz, 1H), 7.79 (m, 1H), 7.64 (m, 1H), 2.85 (s, 3H).

$^{13}\text{C}$  NMR (100 MHz,  $\text{CDCl}_3$ )  $\delta$  167.8, 155.2, 148.6, 147.9, 133.6, 130.4, 129.4, 128.4, 128.0, 127.7, 127.6, 127.5, 25.8.

HRMS (ESI):  $m/z$  calculated for  $\text{C}_{14}\text{H}_{11}\text{N}_3$ : 222.1031;  $[\text{M}+\text{H}]^+$  found: 222.1033.

Yield: 179 mg; 80 %

Physical appearance: Light brown color solid.

Rf: 0.3 (20 % EtOAc in hexanes).

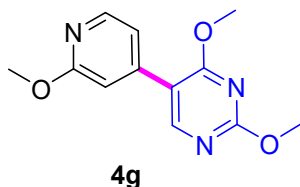

### 2,4-dimethoxy-5-(2-methoxypyridin-4-yl)pyrimidine (**4g**)

$^1\text{H}$  NMR (400 MHz,  $\text{CDCl}_3$ )  $\delta$  8.33 (s, 1H), 8.20 (d,  $J = 5.6$  Hz, 1H), 7.04 (dd,  $J = 5.6$  Hz, 1.6 Hz, 1H), 6.92 (s, 1H), 4.05 (s, 6H), 3.98 (s, 3H).

$^{13}\text{C}$  NMR (100 MHz,  $\text{CDCl}_3$ )  $\delta$  168.1, 165.2, 164.5, 157.9, 146.9, 143.8, 116.6, 113.6, 110.2, 55.1, 54.3, 53.5.

HRMS (ESI):  $m/z$  calculated for  $\text{C}_{12}\text{H}_{14}\text{N}_3\text{O}_3$ : 248.1035;  $[\text{M}+\text{H}]^+$  found: 248.1038

Yield: 185 mg; 75 %

Physical appearance: Light brown color solid.

Rf: 0.3 (20 % EtOAc in hexanes).

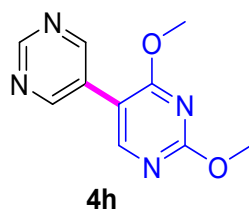

### 2,4-dimethoxy-5,5'-bipyrimidine (**4h**)

$^1\text{H}$  NMR (400 MHz,  $\text{CDCl}_3$ )  $\delta$  9.19 (s, 1H), 8.91 (s, 2H), 8.33 (s, 1H), 4.07 (s, 6H).

$^{13}\text{C}$  NMR (100 MHz,  $\text{CDCl}_3$ )  $\delta$  168.3, 165.6, 157.6, 157.5, 156.0, 127.6, 109.6, 55.2, 54.5

HRMS (ESI):  $m/z$  calculated for  $\text{C}_{10}\text{H}_{11}\text{N}_4\text{O}_2$ : 219.0882;  $[\text{M}+\text{H}]^+$  found: 219.0885.

Yield: 151 mg; 70 %

Physical appearance: off-white solid.

Rf: 0.3 (20 % EtOAc in hexanes).

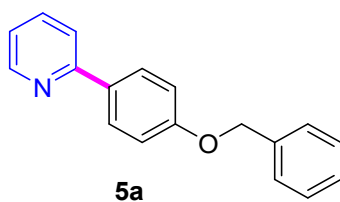

#### 2-(4-(benzyloxy)phenyl)pyridine (**5a**)<sup>9</sup>

<sup>1</sup>H NMR (400 MHz, CDCl<sub>3</sub>) δ 8.66 – 8.64 (m, 1H), 7.96 – 9.93 (m, 2H), 7.74 – 7.65 (m, 2H), 7.47 – 7.45 (m, 2H), 7.42 – 7.38 (m, 2H), 7.35 – 7.31 (m, 1H), 7.19 – 7.16 (m, 1H), 7.07 (d, *J* = 9.2 Hz, 2H), 5.14 (s, 2H).

<sup>13</sup>C NMR (100 MHz, CDCl<sub>3</sub>) δ 158.6, 156.0, 148.5, 135.8, 135.6, 131.2, 127.6, 127.1, 127.0, 126.5, 120.4, 118.8, 114.0, 69.0.

Yield: 185 mg; 71 %

Physical appearance: off-white solid.

Rf: 0.3 (10 % EtOAc in hexanes).

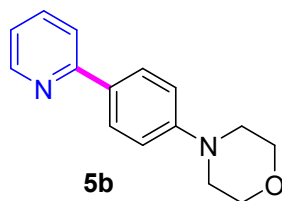

#### 4-(4-(pyridine-2-yl)phenyl)morpholine (**5b**)<sup>10</sup>

<sup>1</sup>H NMR (400 MHz, CDCl<sub>3</sub>) δ 8.56 (d, *J* = 4.8 Hz, 1H), 7.87 (d, *J* = 8.8 Hz, 2H), 7.63 – 7.58 (m, 2H), 7.09 – 7.06 (m, 1H), 6.92 (d, *J* = 8.8 Hz, 2H), 3.81 (t, *J* = 5.2 Hz, 4H), 3.17 (t, *J* = 5.2 Hz, 4H).

<sup>13</sup>C NMR (100 MHz, CDCl<sub>3</sub>) δ 156.1, 150.7, 148.5, 135.6, 129.6, 126.7, 120.2, 118.5, 114.2, 65.8, 47.7.

Yield: 148 mg; 62 %

Physical appearance: off-white solid.

Rf: 0.3 (10 % EtOAc in hexanes).

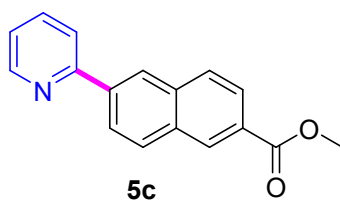

**methyl 6-(pyridin-2-yl)-2-naphthoate (5c)**

$^1\text{H}$  NMR (400 MHz,  $\text{CDCl}_3$ )  $\delta$  8.71 – 8.69 (m, 1H), 8.57 (s, 1H), 8.45 (s, 1H), 8.14 (dd,  $J$  = 8.8 Hz, 1.6 Hz, 1H), 8.07 – 7.91 (m, 2H), 7.98 – 7.91 (m, 1H), 7.84 (dd,  $J$  = 8.0 Hz, 0.8 Hz, 1H), 7.78 – 7.74 (m, 1H), 7.25 – 7.22 (m, 1H), 3.93 (s, 3H).

$^{13}\text{C}$  NMR (100 MHz,  $\text{CDCl}_3$ )  $\delta$  167.2, 156.8, 149.9, 138.9, 136.9, 135.6, 132.6, 130.8, 129.9, 128.9, 127.9, 126.1, 125.7, 125.4, 122.6, 121.0, 52.3.

HRMS (ESI):  $m/z$  calculated for  $\text{C}_{17}\text{H}_{14}\text{NO}_2$ : 264.1025;  $[\text{M}+\text{H}]^+$  found: 264.1028.

Yield: 173 mg; 67 %

Physical appearance: Off-white solid.

Rf: 0.3 (10 % EtOAc in hexanes).

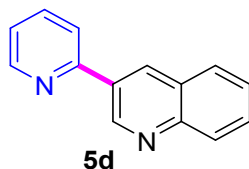

**3-(pyridin-2-yl)quinoline (5d)**

$^1\text{H}$  NMR (400 MHz,  $\text{CDCl}_3$ )  $\delta$  9.55 (d,  $J$  = 2.0 Hz, 1H), 8.79 – 8.78 (m, 2H), 8.16 (d,  $J$  = 8.4 Hz, 1H), 7.95 – 7.90 (m, 2H), 7.85 (td,  $J$  = 7.6 Hz, 1.6 Hz, 1H), 7.76 (td,  $J$  = 7.2 Hz, 1.6 Hz, 1H), 7.60 (td,  $J$  = 7.6 Hz, 1.6 Hz, 1H), 7.36 – 7.34 (m, 1H).

$^{13}\text{C}$  NMR (100 MHz,  $\text{CDCl}_3$ )  $\delta$  154.8, 150.2, 149.3, 148.2, 137.1, 133.9, 131.9, 130.0, 129.2, 128.5, 127.9, 127.0, 122.8, 120.8.

HRMS (ESI):  $m/z$  calculated for  $\text{C}_{14}\text{H}_{11}\text{N}_2$ : 207.0922;  $[\text{M}+\text{H}]^+$  found: 207.0922.

Yield: 124 mg; 60 %

Physical appearance: Semi-solid.

Rf: 0.3 (10 % EtOAc in hexanes).

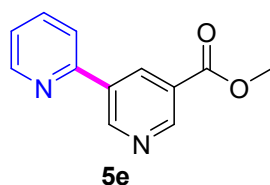

**methyl [2,3'-bipyridine]-5'-carboxylate (5e)**

$^1\text{H}$  NMR (400 MHz,  $\text{CDCl}_3$ )  $\delta$  9.41 (s, 1H), 9.27 (s, 1H), 8.90 (s, 1H), 8.76 (d,  $J = 4.4$  Hz, 1H), 7.86 – 7.81 (m, 2H), 7.36 – 7.33 (m, 1H), 4.00 (s, 3H).

$^{13}\text{C}$  NMR (100 MHz,  $\text{CDCl}_3$ )  $\delta$  165.7, 153.7, 151.8, 150.8, 150.2, 137.2, 135.2, 134.7, 126.1, 123.3, 120.8, 52.5.

HRMS (ESI):  $m/z$  calculated for  $\text{C}_{12}\text{H}_{11}\text{N}_2\text{O}_2$ : 215.0821;  $[\text{M}+\text{H}]^+$  found: 215.0819.

Yield: 118 mg; 55 %

Physical appearance: off-white solid.

Rf: 0.3 (10 % EtOAc in hexanes).

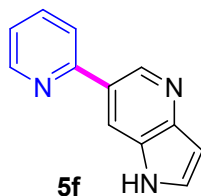

**6-(pyridin-2-yl)-1H-pyrrolo[3,2-b]pyridine (5f)**

$^1\text{H}$  NMR (400 MHz,  $\text{CDCl}_3$ )  $\delta$  11.53 (brs, 1H), 9.06 (brs, 1H), 8.69 – 8.67 (m, 1H), 8.41 (s, 1H), 8.05 (d,  $J = 8.0$  Hz, 1H), 7.91 – 7.86 (m, 1H), 7.74 – 7.73 (m, 1H), 7.36 – 7.32 (m, 1H), 6.60 (s, 1H).

$^{13}\text{C}$  NMR (100 MHz,  $\text{CDCl}_3$ )  $\delta$  156.0, 150.1, 147.3, 141.9, 137.7, 131.3, 129.4, 127.9, 122.6, 120.6, 116.6, 102.2.

HRMS (ESI):  $m/z$  calculated for  $\text{C}_{12}\text{H}_{10}\text{N}_3$ : 196.0875;  $[\text{M}+\text{H}]^+$  found: 196.0873.

Yield: 114 mg; 59 %

Physical appearance: off-white Solid

Rf: 0.3 (10 % EtOAc in hexanes).

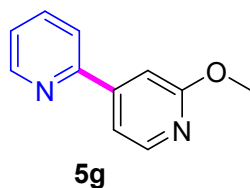

### 2'-methoxy-2,4'-bipyridine

$^1\text{H}$  NMR (400 MHz,  $\text{CDCl}_3$ )  $\delta$  8.73 (d,  $J = 4.0$  Hz, 1H), 8.26 (d,  $J = 5.2$  Hz, 1H), 7.82 – 7.74 (m, 2H), 7.49 (dd,  $J = 5.2$  Hz, 1.6 Hz, 1H), 7.34 – 7.31 (m, 2H), 3.99 (s, 3H).

$^{13}\text{C}$  NMR (100 MHz,  $\text{CDCl}_3$ )  $\delta$  164.0, 153.7, 148.9, 148.3, 146.4, 135.9, 122.7, 119.9, 113.6, 107.2, 52.6.

HRMS (ESI):  $m/z$  calculated for  $\text{C}_{11}\text{H}_{11}\text{N}_2\text{O}$ : 187.0871;  $[\text{M}+\text{H}]^+$  found: 187.0874.

Yield: 116 mg; 64 %

Physical appearance: Brown solid.

Rf: 0.3 (20 % EtOAc in hexanes).

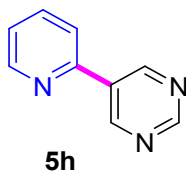

### 5-(pyridin-2-yl)pyrimidine<sup>11</sup>

$^1\text{H}$  NMR (400 MHz,  $\text{CDCl}_3$ )  $\delta$  9.46 (s, 2H), 9.27 (s, 1H), 8.75 (m, 1H), 8.16 (d,  $J = 8.0$  Hz, 1H), 8.01 – 7.97 (m, 1H), 7.53 – 7.48 (m, 1H).

$^{13}\text{C}$  NMR (100 MHz,  $\text{CDCl}_3$ )  $\delta$  158.9, 155.3, 151.7, 150.6, 138.1, 132.2, 124.5, 121.5.

Yield: 102 mg; 65 %

Physical appearance: Colorless gummy.

Rf: 0.3 (10 % EtOAc in hexanes).

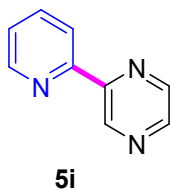

### 2-(pyridin-2-yl)pyrazine<sup>12</sup>

<sup>1</sup>H NMR (400 MHz, CDCl<sub>3</sub>) δ 9.64 (d, *J* = 1.2 Hz, 1H), 8.73 (d, *J* = 4.4 Hz, 1H), 8.63 – 8.60 (m, 2H), 8.36 (d, *J* = 8.0 Hz, 1H), 7.88 -7.83 (m, 1H), 7.39 – 7.36 (m, 1H).

<sup>13</sup>C NMR (100 MHz, CDCl<sub>3</sub>) δ 154.2, 151.1, 149.5, 144.5, 143.6, 143.4, 137.1, 124.5, 121.5.

Yield: 95 mg; 62 %

Physical appearance: Off-white solid.

Rf: 0.3 (10 % EtOAc in hexanes).

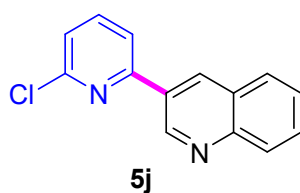

### 3-(6-chloropyridin-2-yl)quinoline<sup>13</sup>

<sup>1</sup>H NMR (400 MHz, CDCl<sub>3</sub>) δ 9.48 (d, *J* = 2.0 Hz, 1H), 8.83 (d, *J* = 2.0 Hz, 1H), 8.15 (d, *J* = 8.4 Hz, 1H), 7.95 (d, *J* = 8.4 Hz, 1H), 7.85 – 7.62 (m, 3H), 7.62 – 7.60 (m, 1H), 7.37 – 7.35 (m, 1H).

<sup>13</sup>C NMR (100 MHz, CDCl<sub>3</sub>) δ 155.5, 151.9, 148.8, 148.4, 139.6, 134.4, 130.4, 130.3, 129.3, 128.7, 127.7, 127.2, 123.4, 119.0.

Yield: 194 mg; 82 %

Physical appearance: Off-white solid.

Rf: 0.3 (10 % EtOAc in hexanes).

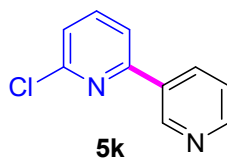

### 6-chloro-2,3'-bipyridine<sup>14</sup>

<sup>1</sup>H NMR (400 MHz, CDCl<sub>3</sub>) δ 9.19 (s, 1H), 8.67 (d, *J* = 1.6 Hz, 1H), 8.36 – 8.33 (m, 1H), 7.79 – 7.68 (m, 2H), 7.42 – 7.40 (m, 1H), 7.33 (d, *J* = 8.0 Hz, 1H).



$^{13}\text{C}$  NMR (100 MHz,  $\text{CDCl}_3$ )  $\delta$  155.4, 151.8, 150.5, 148.1, 139.6, 143.6, 133.4, 123.7, 123.4, 118.8.

Yield: 138 mg; 74 %

Physical appearance: Off-white solid.

Rf: 0.3 (10 % EtOAc in hexanes).

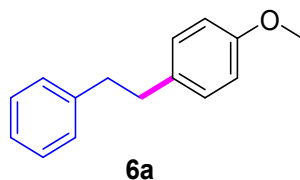

### 10.1-methoxy-4-phenethylbenzene (**5g**)<sup>15</sup>

$^1\text{H}$  NMR (400 MHz,  $\text{CDCl}_3$ )  $\delta$  7.28-7.24 (m, 2H), 7.19-7.15 (m, 3H), 7.08 (d,  $J = 6.4$  Hz, 2H), 6.81 (d,  $J = 6.4$  Hz, 2H), 3.77 (s, 3H), 2.87-2.86 (m, 4H).

$^{13}\text{C}$  NMR (100 MHz,  $\text{CDCl}_3$ )  $\delta$  157.9, 141.9, 133.9, 129.4, 128.5, 128.3, 125.9, 113.8, 55.2, 38.2, 37.0.

Yield: 164 mg; 78 %

Physical appearance: Off-white solid.

Rf: 0.3 (10 % EtOAc in hexanes).

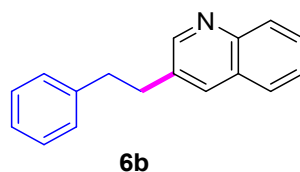

### 3-phenethylquinoline (**6b**)<sup>16</sup>

$^1\text{H}$  NMR (400 MHz,  $\text{CDCl}_3$ )  $\delta$  8.73 (d,  $J = 2.0$  Hz, 1H), 8.08 (d,  $J = 8.4$  Hz, 1H), 7.83 (d,  $J = 2.0$  Hz, 1H), 7.72 – 7.70 (m, 1H), 7.66 – 7.61 (m, 1H), 7.49 (m, 1H), 7.29 – 7.25 (m, 2H), 7.23- 7.19 (m, 3H), 3.10 -2.97 (m, 4H).

$^{13}\text{C}$  NMR (100 MHz,  $\text{CDCl}_3$ )  $\delta$  152.0, 146.9, 140.8, 134.5, 134.2, 129.2, 128.7, 128.5, 128.5, 128.1, 127.4, 126.6, 126.3, 37.5, 35.1.

Yield: 195 mg; 84 %

Physical appearance: colorless gum.

Rf: 0.3 (10 % EtOAc in hexanes).

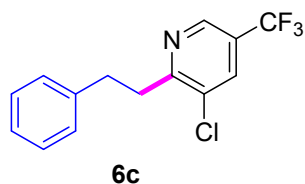

### 3-chloro-2-phenethyl-5-(trifluoromethyl)pyridine

$^1\text{H}$  NMR (400 MHz,  $\text{CDCl}_3$ )  $\delta$  8.71 (d,  $J = 1.6$  Hz, 1H), 7.88 (d,  $J = 1.6$  Hz, 1H), 7.32 – 7.22 (m, 5H), 3.30 (t,  $J = 8.0$  Hz, 2H), 3.08 (t,  $J = 8.0$  Hz, 2H).

$^{13}\text{C}$  NMR (100 MHz,  $\text{CDCl}_3$ )  $\delta$  162.5, 143.9, 143.9 (q,  $J = 8.0$  Hz), 140.9, 133.8 (q,  $J = 7.0$  Hz), 131.3, 128.4 (d,  $J = 7.0$  Hz), 126.8, 125.6 (q,  $J = 66.0$  Hz), 122.8 (d,  $J = 272.0$  Hz), 37.4, 33.8.

$^{19}\text{F}$  NMR (376 MHz,  $\text{CDCl}_3$ )  $\delta$  -62.16

HRMS (ESI):  $m/z$  calculated for  $\text{C}_{14}\text{H}_{11}\text{ClF}_3\text{N}$ : 286.061;  $[\text{M}+\text{H}]^+$  found: 286.0612.

Yield: 154 mg; 54 %

Physical appearance: Off-white solid.

Rf: 0.3 (10 % EtOAc in hexanes).

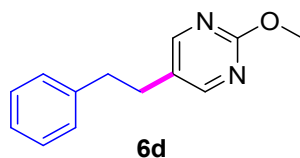

### 2-methoxy-5-phenethylpyrimidine (6d)

$^1\text{H}$  NMR (400 MHz,  $\text{CDCl}_3$ )  $\delta$  8.23 (s, 2H), 7.28 (m, 2H), 7.22 (t,  $J = 7.6$  Hz, 1H), 7.13 (t,  $J = 7.6$  Hz, 2H), 3.97 (s, 3H), 2.89 (t,  $J = 5.6$  Hz, 2H), 2.84 (t,  $J = 5.6$  Hz, 2H).

$^{13}\text{C}$  NMR (100 MHz,  $\text{CDCl}_3$ )  $\delta$  164.5, 158.9, 140.1, 128.6, 128.5, 127.3, 126.4, 54.8, 37.3, 31.2.

HRMS (ESI):  $m/z$  calculated for  $\text{C}_{13}\text{H}_{14}\text{N}_2\text{O}$ : 215.1184;  $[\text{M}+\text{H}]^+$  found: 215.1192.

Yield: 145 mg; 68 %

Physical appearance: Off-white solid

Rf: 0.3 (10 % EtOAc in hexanes).

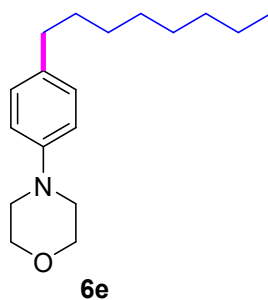

#### 4-(4-octylphenyl)morpholine

$^1\text{H}$  NMR (400 MHz,  $\text{CDCl}_3$ )  $\delta$  7.09 (d,  $J = 8.4$  Hz, 2H), 6.84 (d,  $J = 8.4$  Hz, 2H), 3.86 (t,  $J = 5.6$  Hz, 4H), 3.12 (t,  $J = 5.6$  Hz, 4H), 2.52 (t,  $J = 7.2$  Hz, 2H), 1.60 – 1.55 (m, 2H), 1.29 – 1.21 (m, 10H), 0.88 (t,  $J = 4.4$  Hz, 3H).

$^{13}\text{C}$  NMR (100 MHz,  $\text{CDCl}_3$ )  $\delta$  149.3, 134.8, 129.1, 115.89, 67.0, 49.8, 35.0, 31.9, 31.7, 29.5, 29.35, 29.31, 22.7, 14.1.

HRMS (ESI):  $m/z$  calculated for  $\text{C}_{18}\text{H}_{30}\text{NO}$ : 276.2327;  $[\text{M}+\text{H}]^+$  found: 276.2332.

Yield: 170 mg; 62 %

Physical appearance: High viscous oil Naveen.

Rf: 0.4 (10 % EtOAc in hexanes).

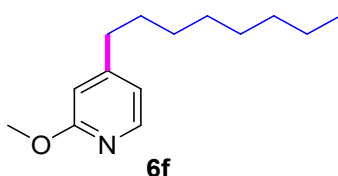

#### 2-methoxy-4-octylpyridine

$^1\text{H}$  NMR (400 MHz,  $\text{CDCl}_3$ )  $\delta$  8.04 (d,  $J = 5.2$  Hz, 1H), 6.70 (dd,  $J = 5.2$  Hz, 1.6 Hz, 1H), 6.55 (d,  $J = 1.6$  Hz, 1H), 3.92 (s, 3H), 2.54 (t,  $J = 7.6$  Hz, 2H), 1.63 – 1.55 (m, 2H), 1.29 – 1.24 (m, 10H), 0.87 (t,  $J = 6.8$  Hz, 3H).

$^{13}\text{C}$  NMR (100 MHz,  $\text{CDCl}_3$ )  $\delta$  164.4, 154.7, 146.4, 117.6, 110.2, 53.3, 35.2, 31.8, 30.2, 29.4, 29.2, 29.1, 22.6, 14.1.

HRMS (ESI):  $m/z$  calculated for  $\text{C}_{14}\text{H}_{24}\text{NO}$ : 222.1858;  $[\text{M}+\text{H}]^+$  found: 222.1871.

Yield: 120 mg; 54 %

Physical appearance: colorless oil.

Rf: 0.4 (5 % EtOAc in hexanes).

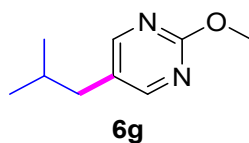

**5-isobutyl-2-methoxy pyrimidine (6g)**

$^1\text{H}$  NMR (400 MHz,  $\text{CDCl}_3$ )  $\delta$  8.30 (s, 2H), 3.99 (s, 3H), 2.40 (d,  $J = 7.2$  Hz, 2H), 1.83 (m, 1H), 0.99 (d,  $J = 6.8$  Hz, 6H).

$^{13}\text{C}$  NMR (100 MHz,  $\text{CDCl}_3$ )  $\delta$  164.4, 159.3, 127.2, 54.7, 38.5, 29.8, 21.9.

HRMS (ESI):  $m/z$  calculated for  $\text{C}_9\text{H}_{15}\text{N}_2\text{O}$ : 167.1184;  $[\text{M}+\text{H}]^+$  found: 167.1185.

Yield: 75 mg; 45 %

Physical appearance: High viscous oil.

Rf: 0.3 (5 % EtOAc in hexanes).

## 9. Scanned copy of spectra's ( $^1\text{H}$ , $^{13}\text{C}$ , and $^{19}\text{F}$ -NMR) of SMC products (3a – 3u, 4a – 4h, 5a – 5i, 6a – 6g)

### $^1\text{H}$ and $^{13}\text{C}$ NMR of Compound 3a

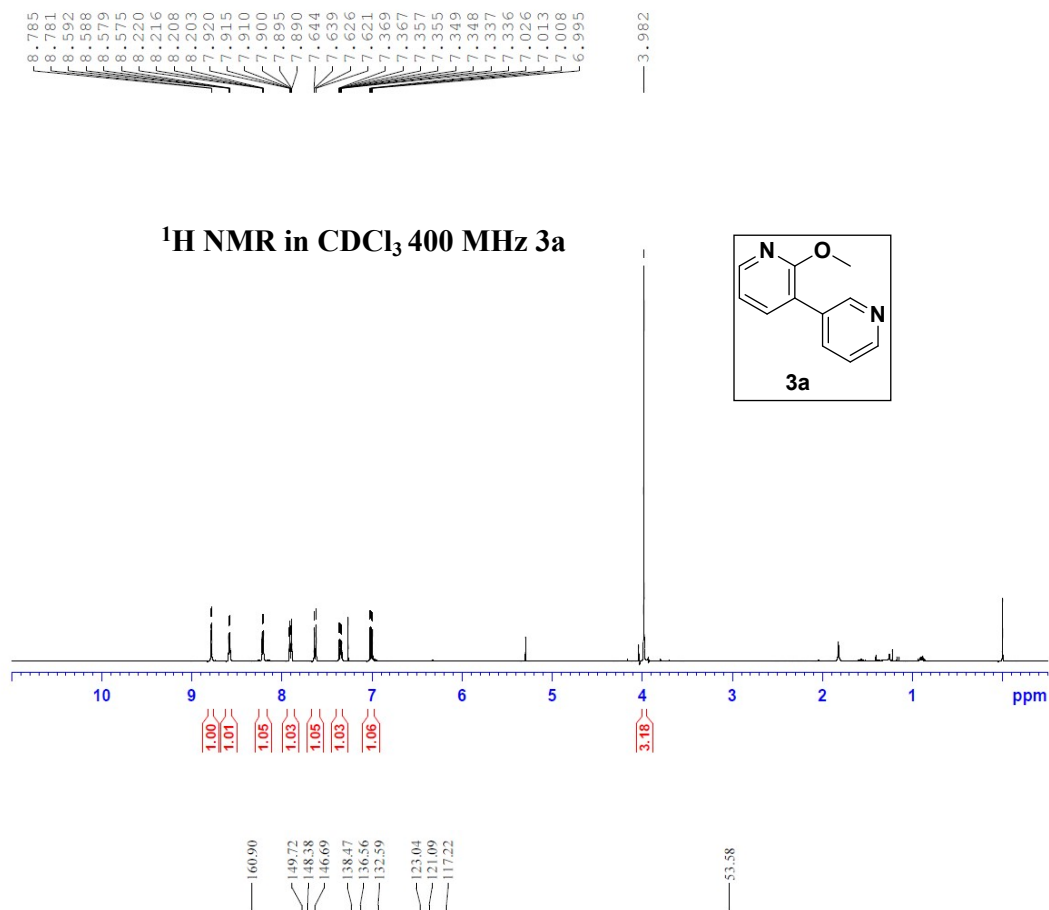

# $^1\text{H}$ and $^{13}\text{C}$ NMR of Compound 3b

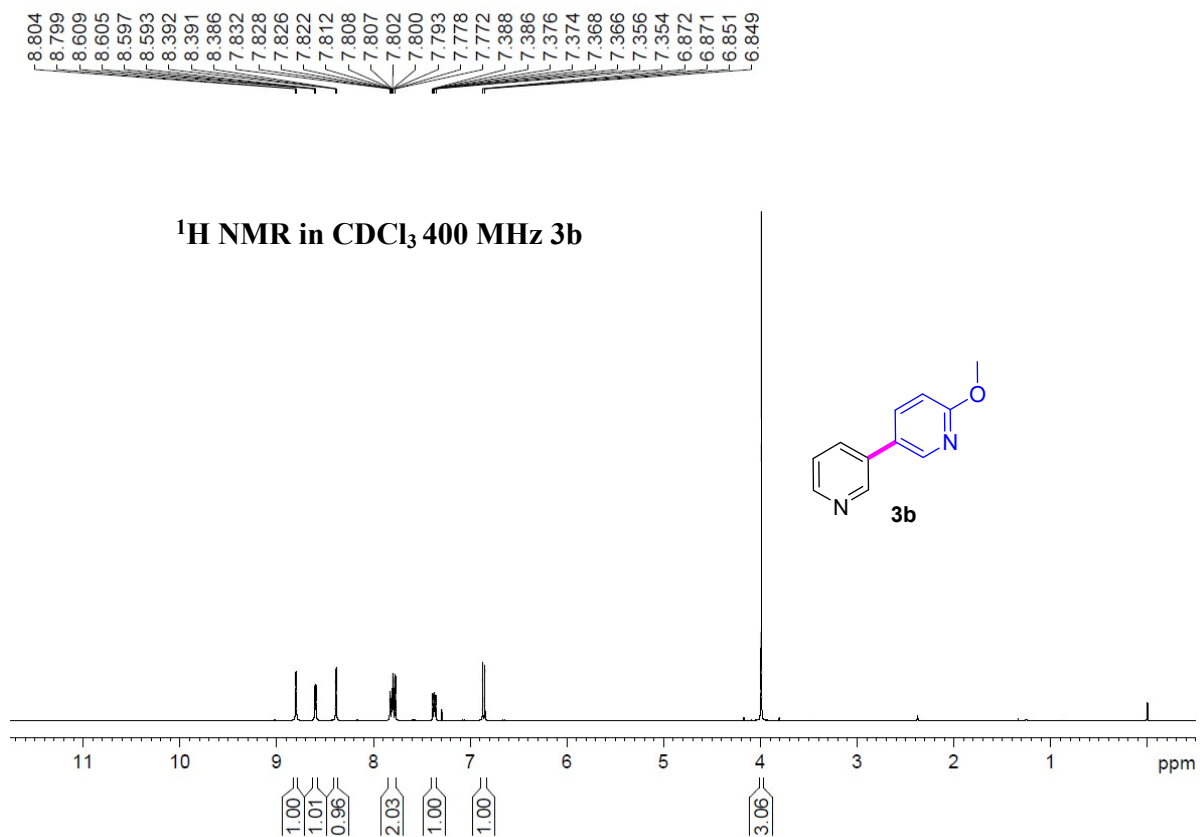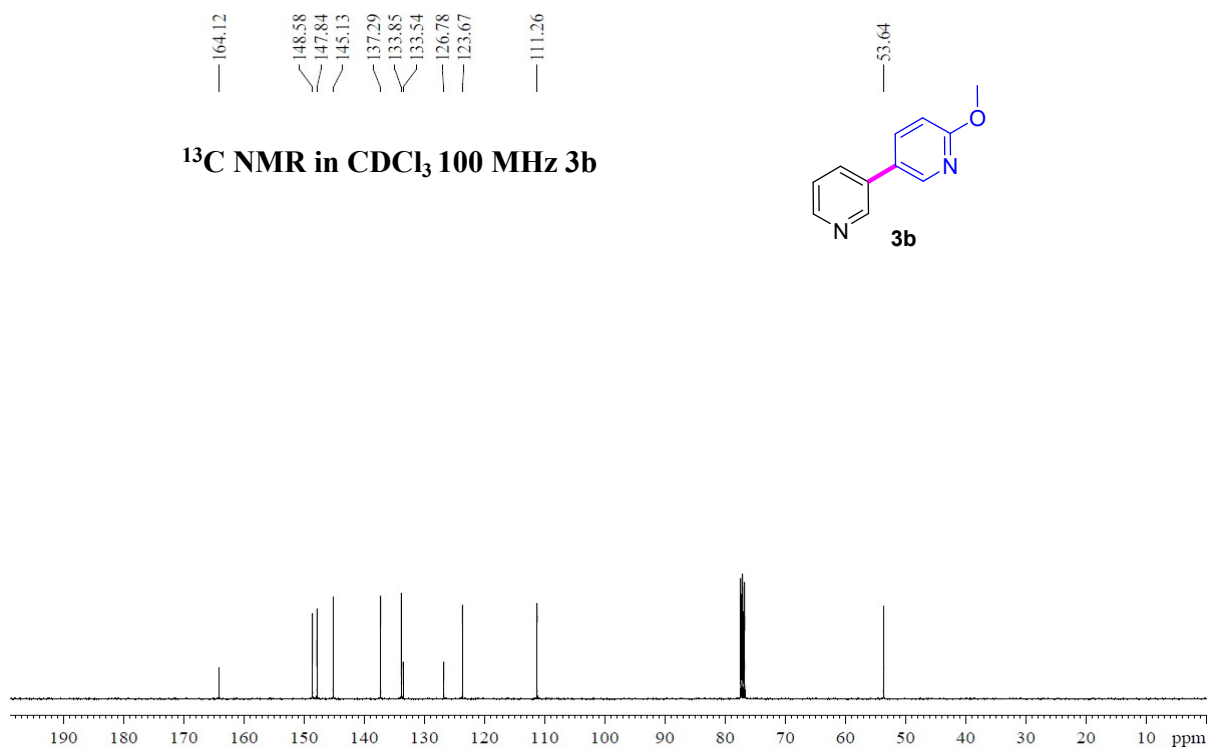

# $^1\text{H}$ , $^{13}\text{C}$ , and $^{19}\text{F}$ -NMR of Compound 3c

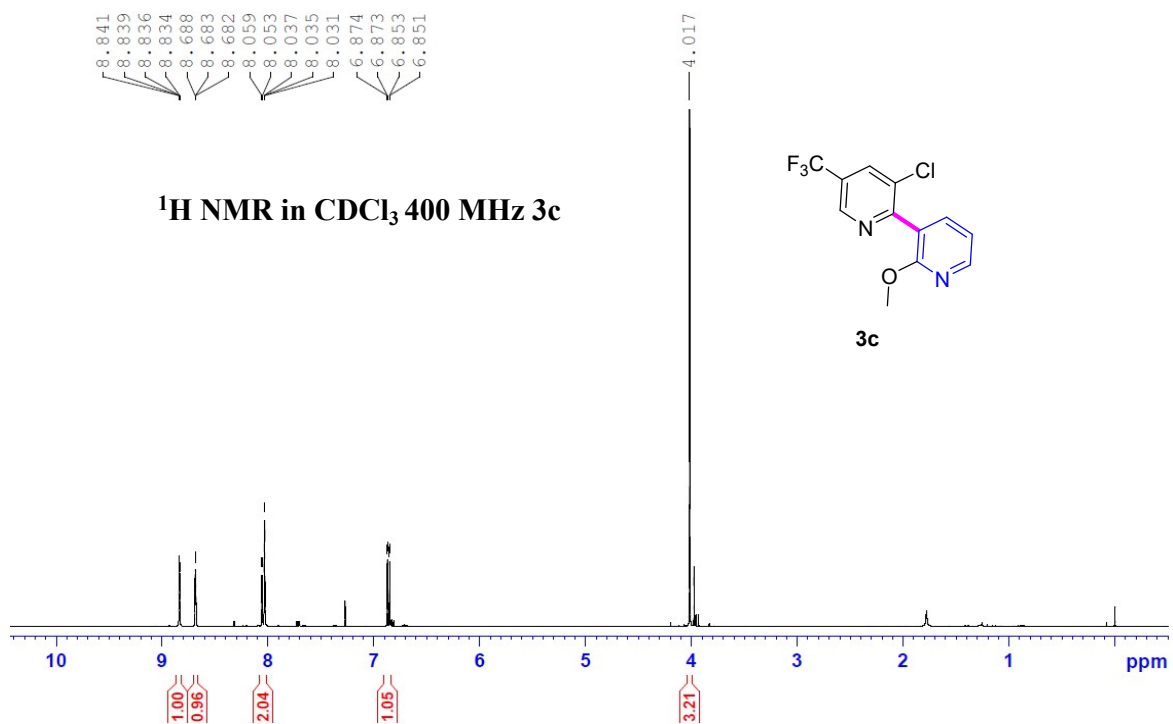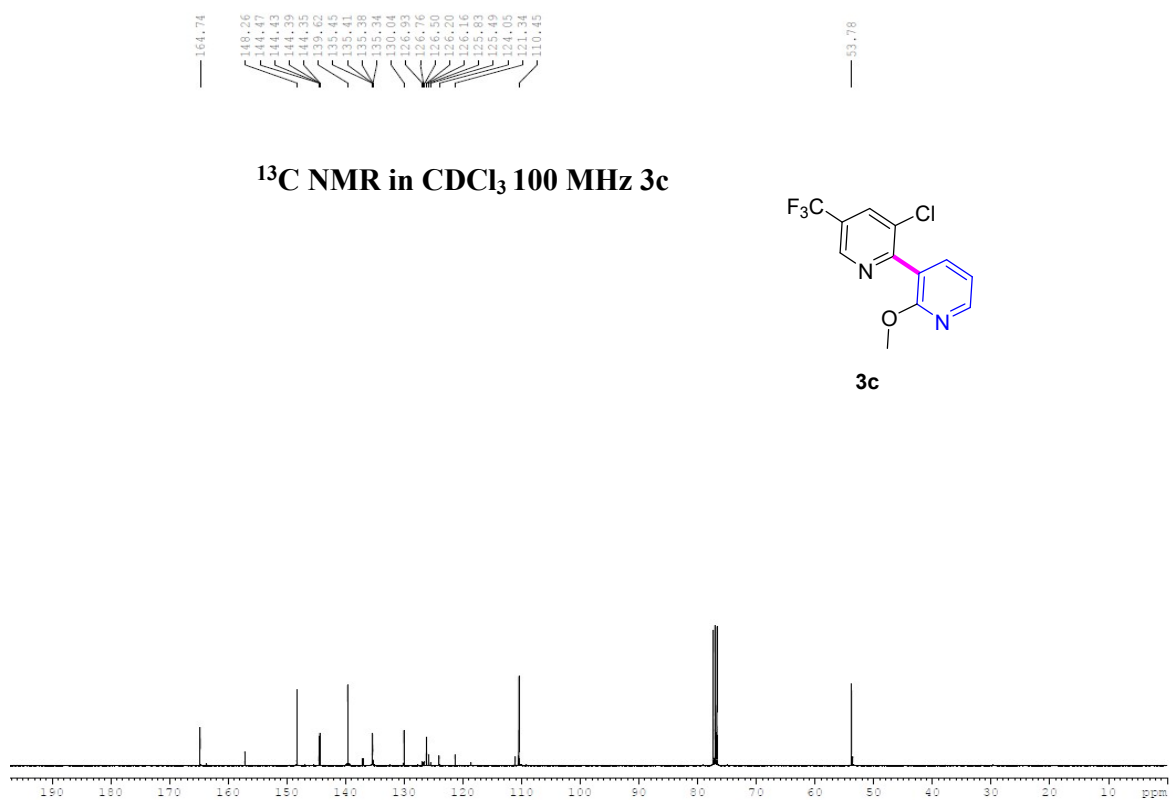

$^{19}\text{F}$  NMR in  $\text{CDCl}_3$  376 MHz **3c**

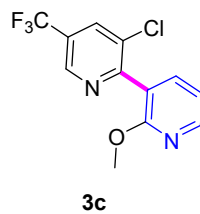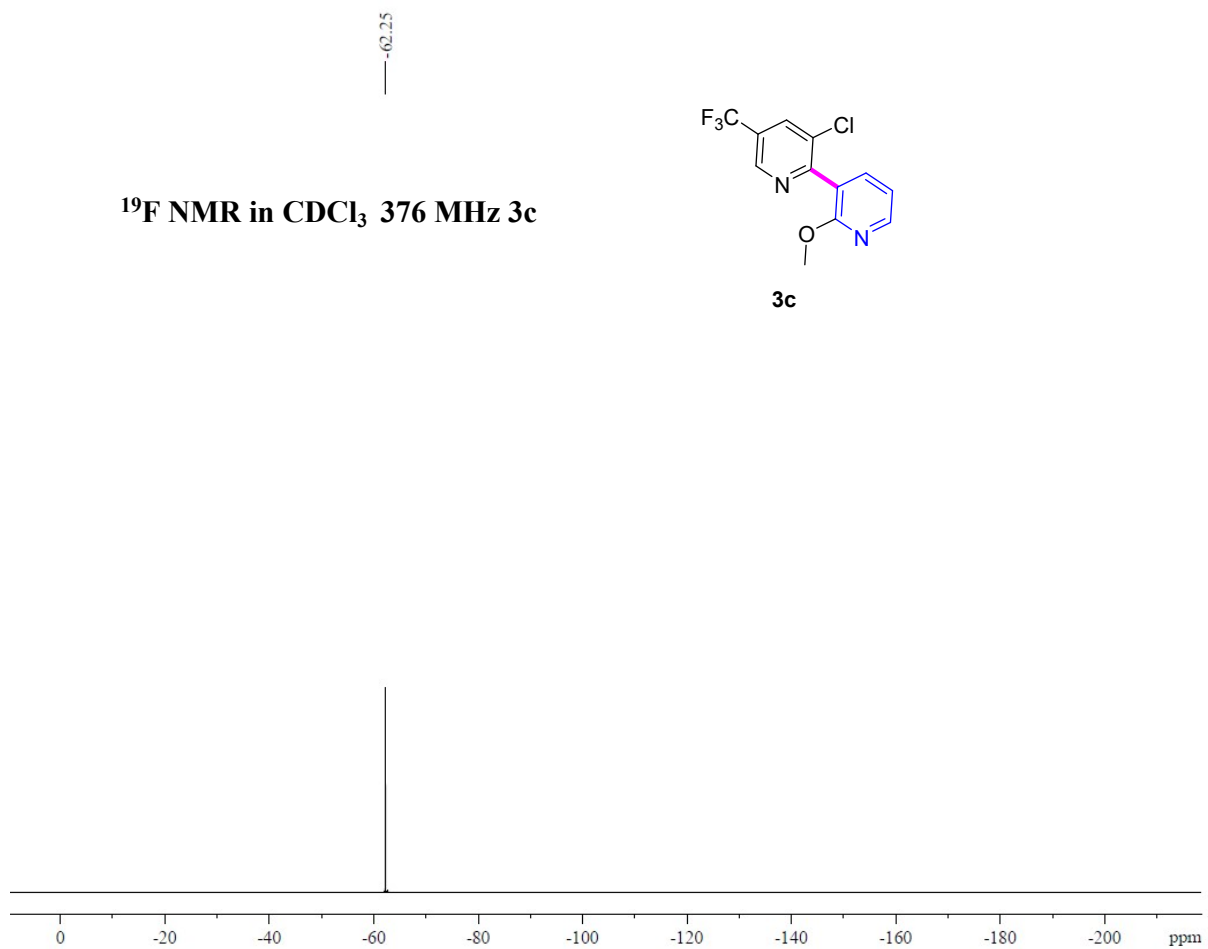



# $^1\text{H}$ and $^{13}\text{C}$ NMR of Compound 3d

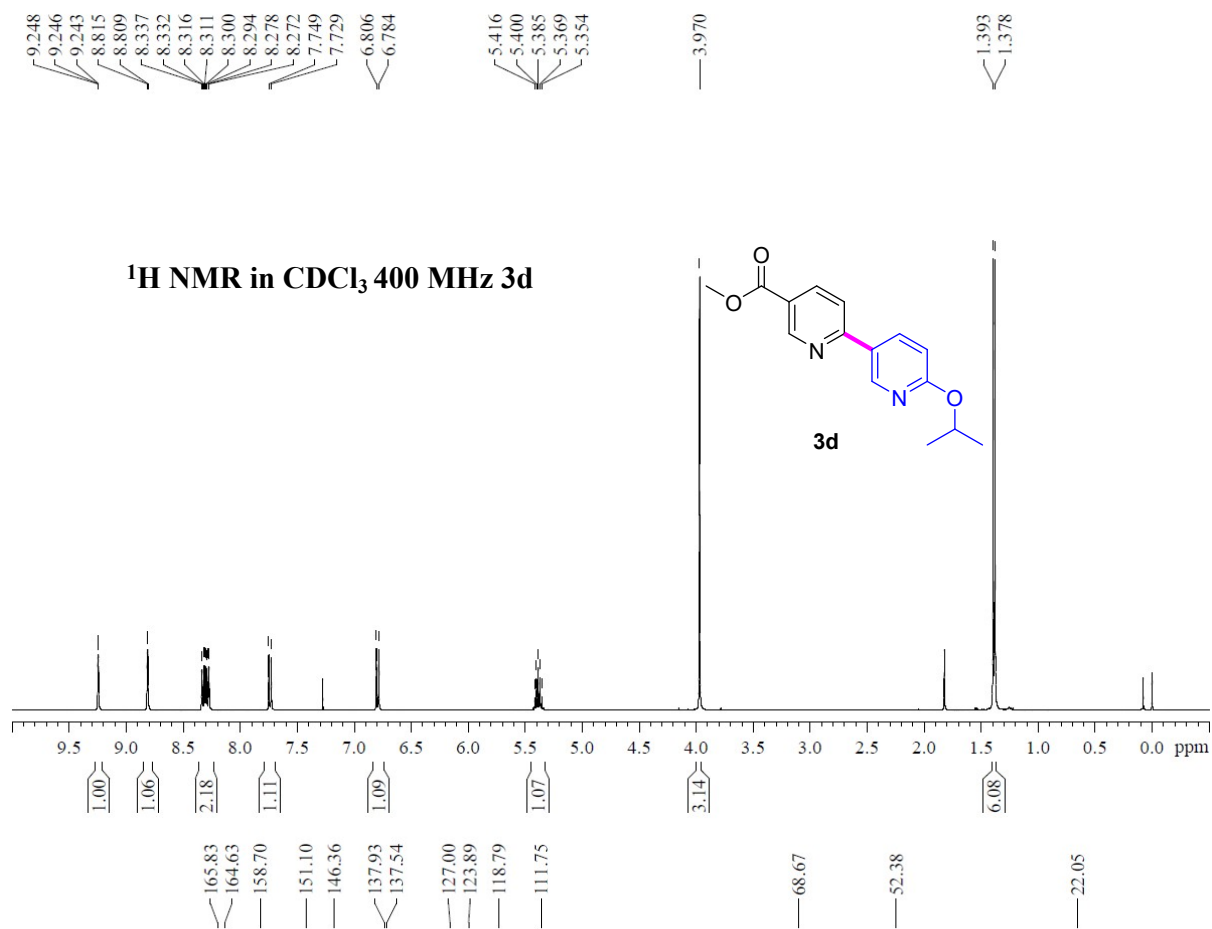

# $^1\text{H}$ and $^{13}\text{C}$ NMR of Compound 3e

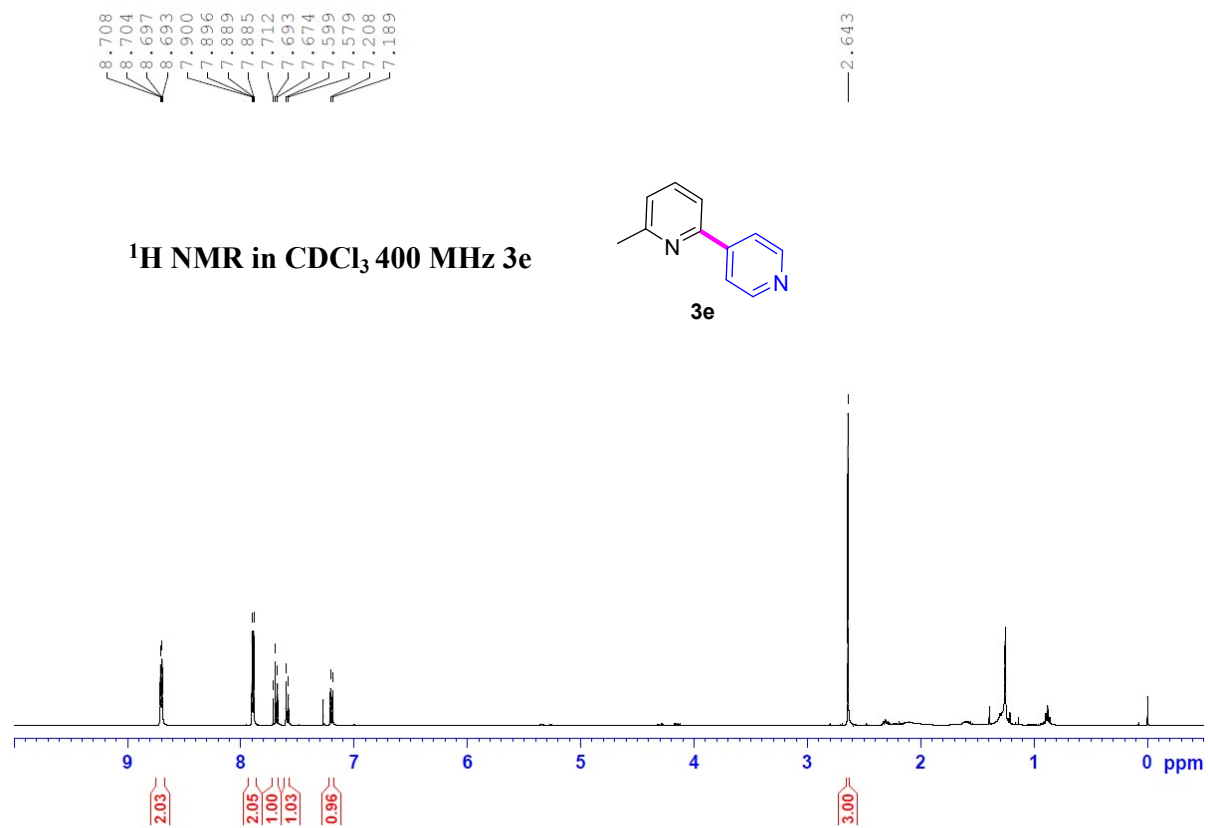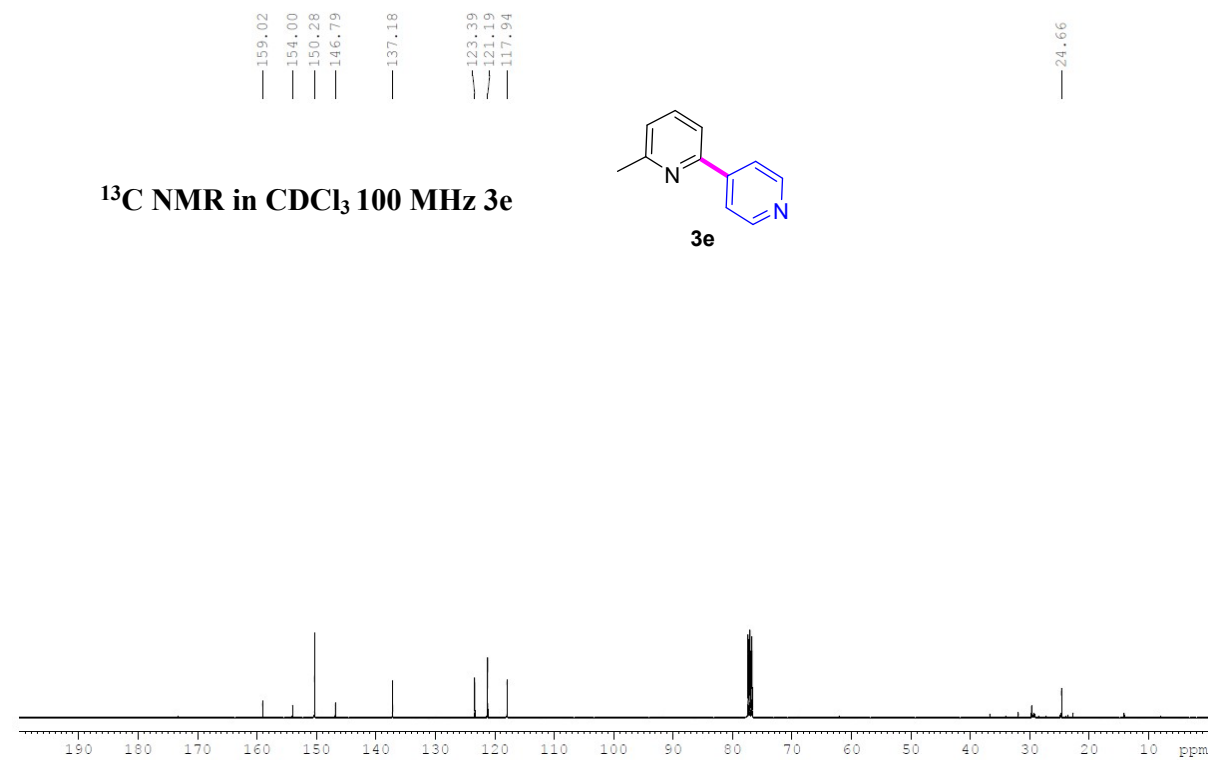

# $^1\text{H}$ , $^{13}\text{C}$ , and $^{19}\text{F}$ -NMR of Compound 3f

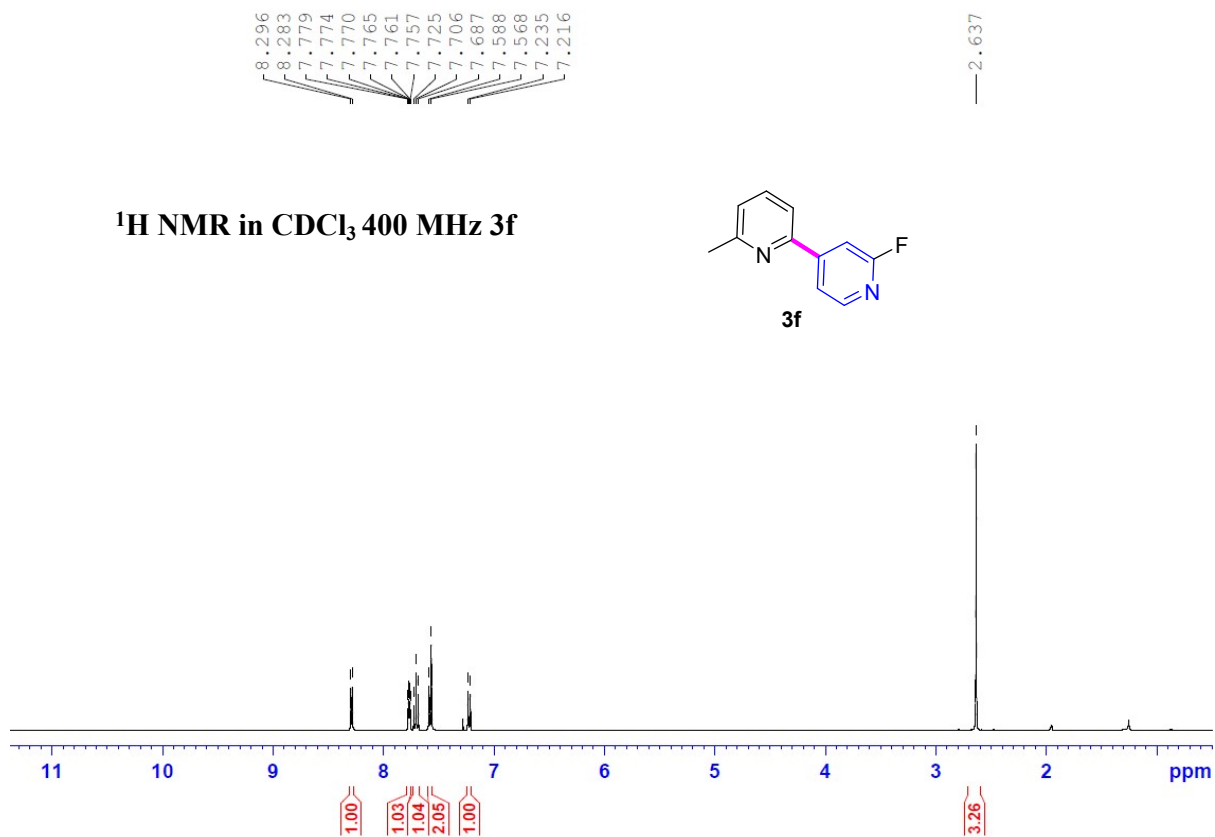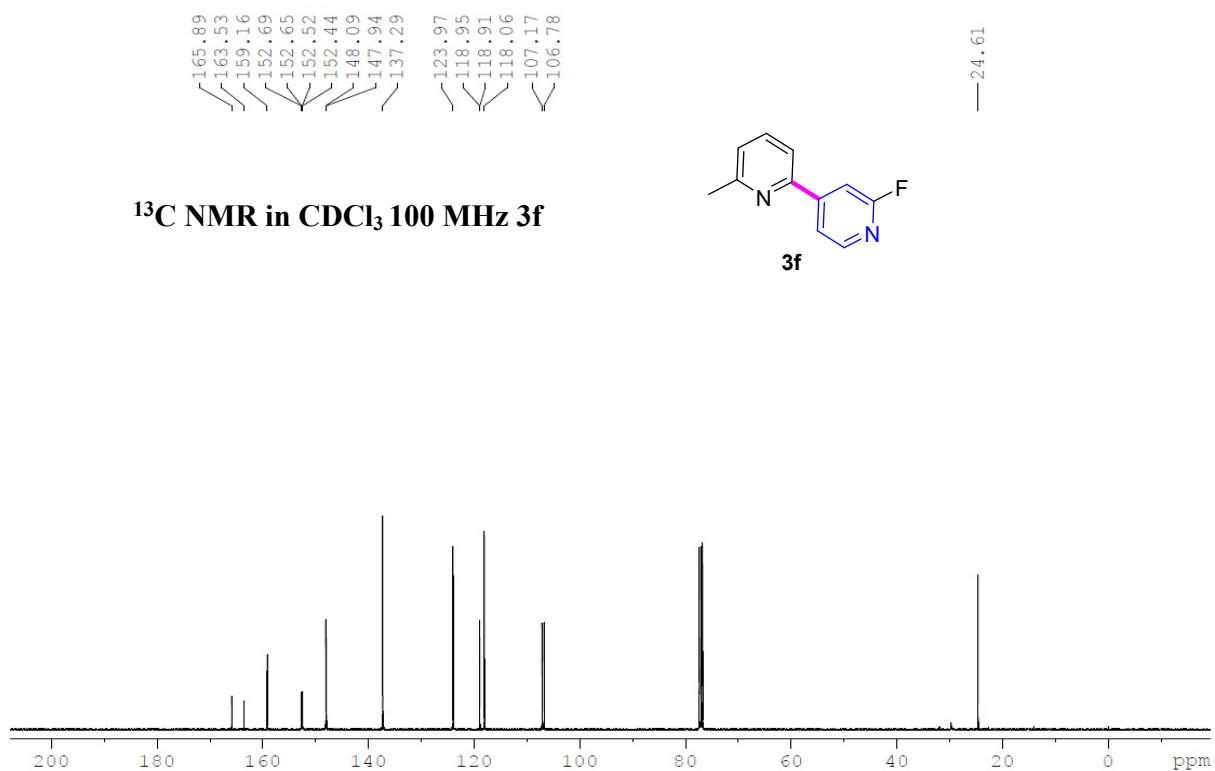

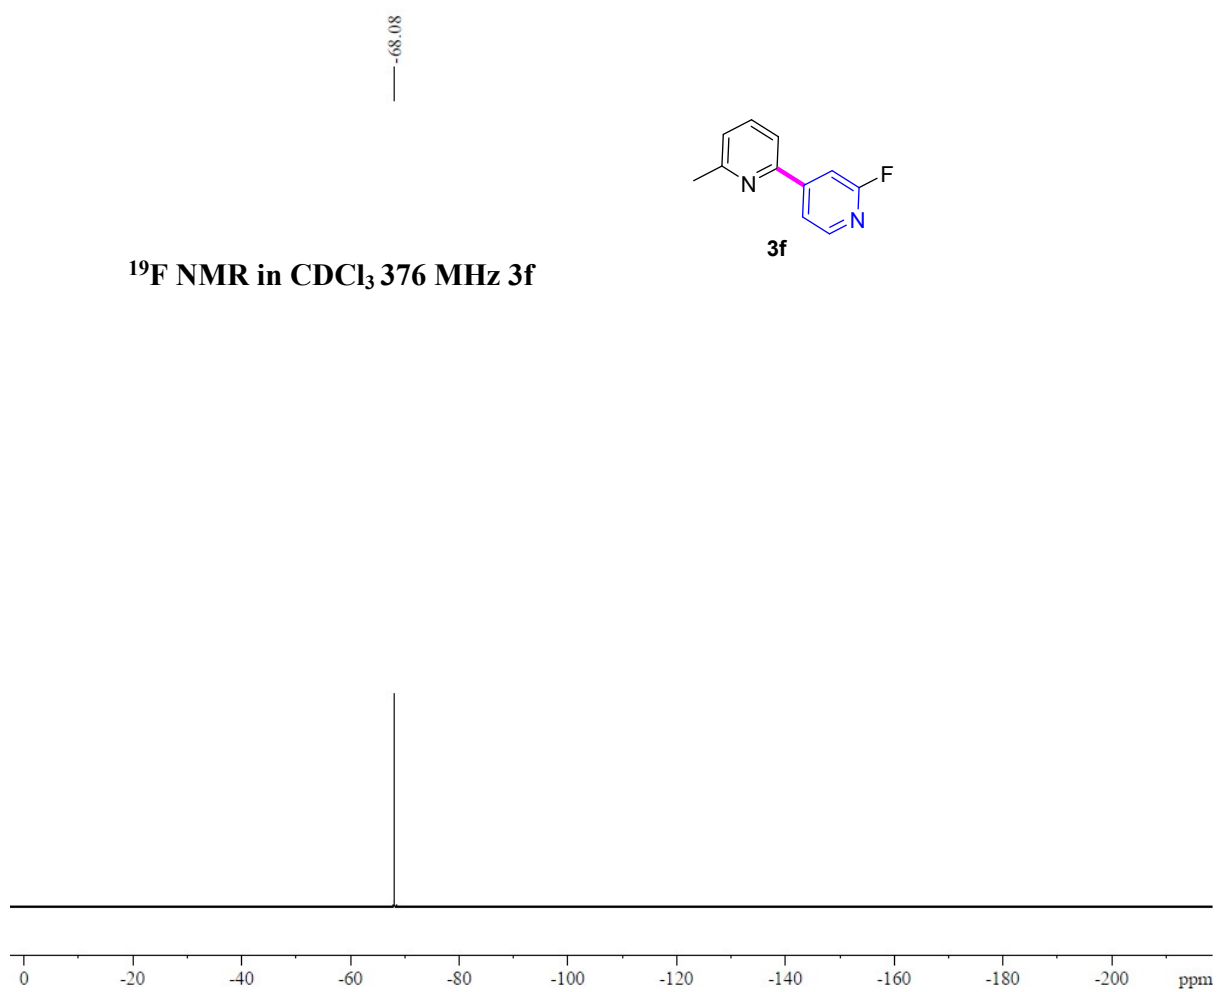

# $^1\text{H}$ and $^{13}\text{C}$ NMR of Compound 3g

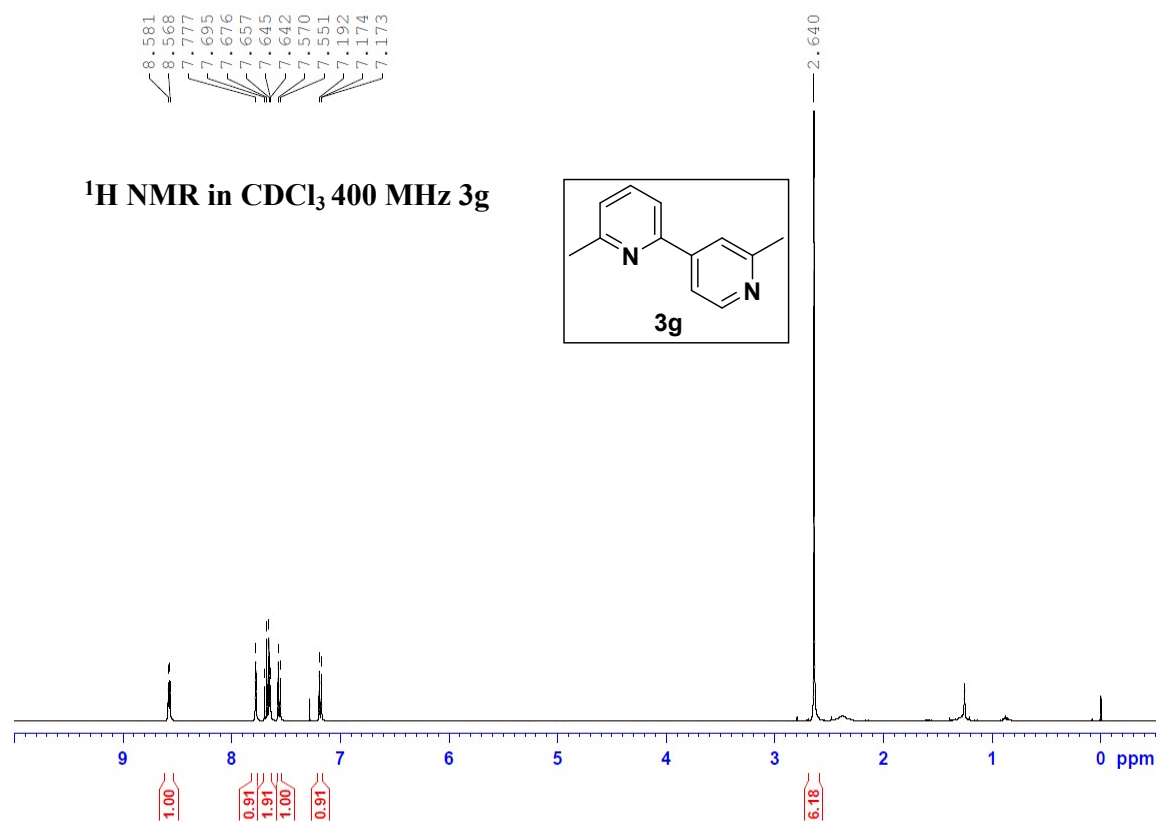

# $^{13}\text{C}$ NMR in $\text{CDCl}_3$ 100 MHz 3g

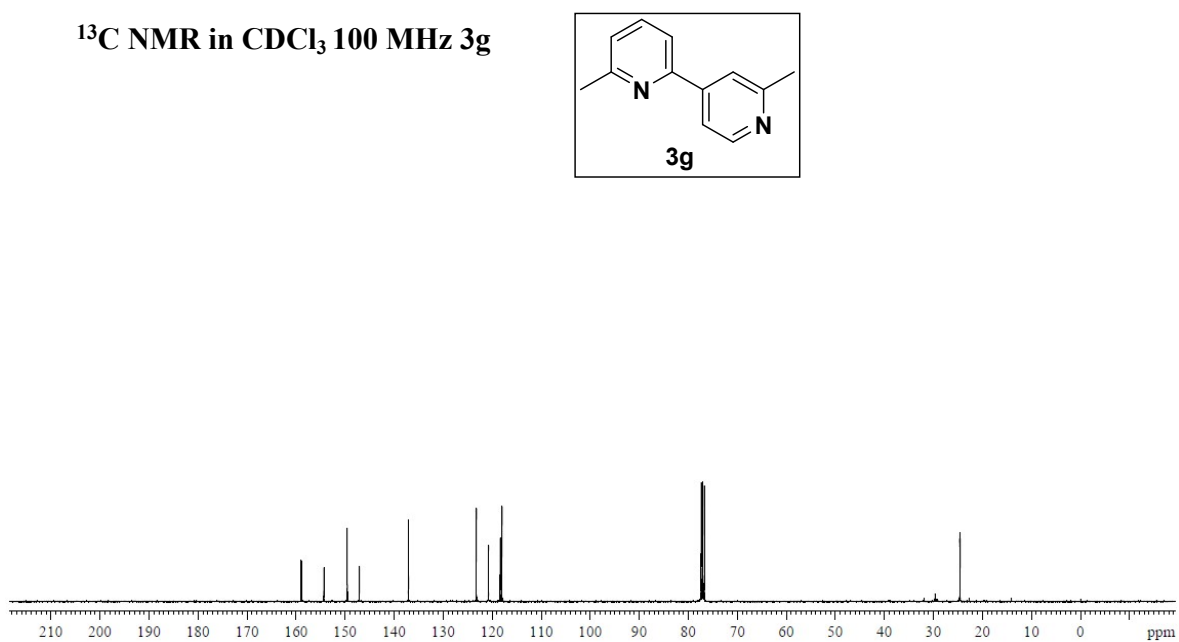

# $^1\text{H}$ , $^{13}\text{C}$ , and $^{19}\text{F}$ -NMR of Compound 3h

8.897  
8.894  
8.391  
8.378  
8.115  
8.112  
7.609  
7.605  
7.601  
7.596  
7.592  
7.588  
7.353

## $^1\text{H}$ NMR in $\text{CDCl}_3$ 400 MHz 3h

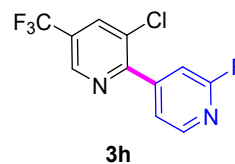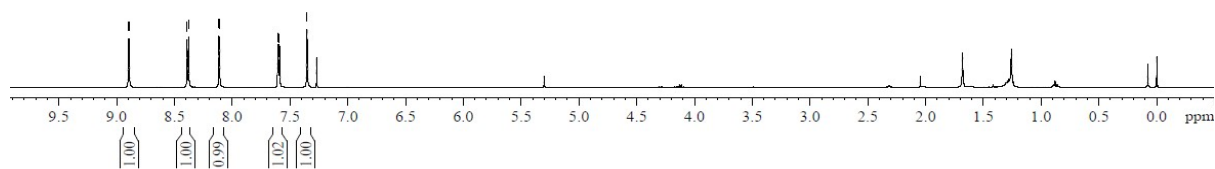

164.96  
162.59  
155.94  
149.57  
149.49  
147.98  
147.83  
144.72  
144.68  
144.64  
144.60  
135.88  
135.84  
135.81  
135.77  
130.57  
128.22  
127.88  
127.54  
127.21  
126.44  
123.72  
121.58  
121.53  
121.01  
118.30  
110.34  
109.95

## $^{13}\text{C}$ NMR in $\text{CDCl}_3$ 100 MHz 3h

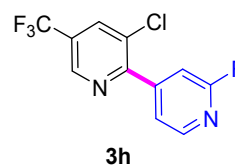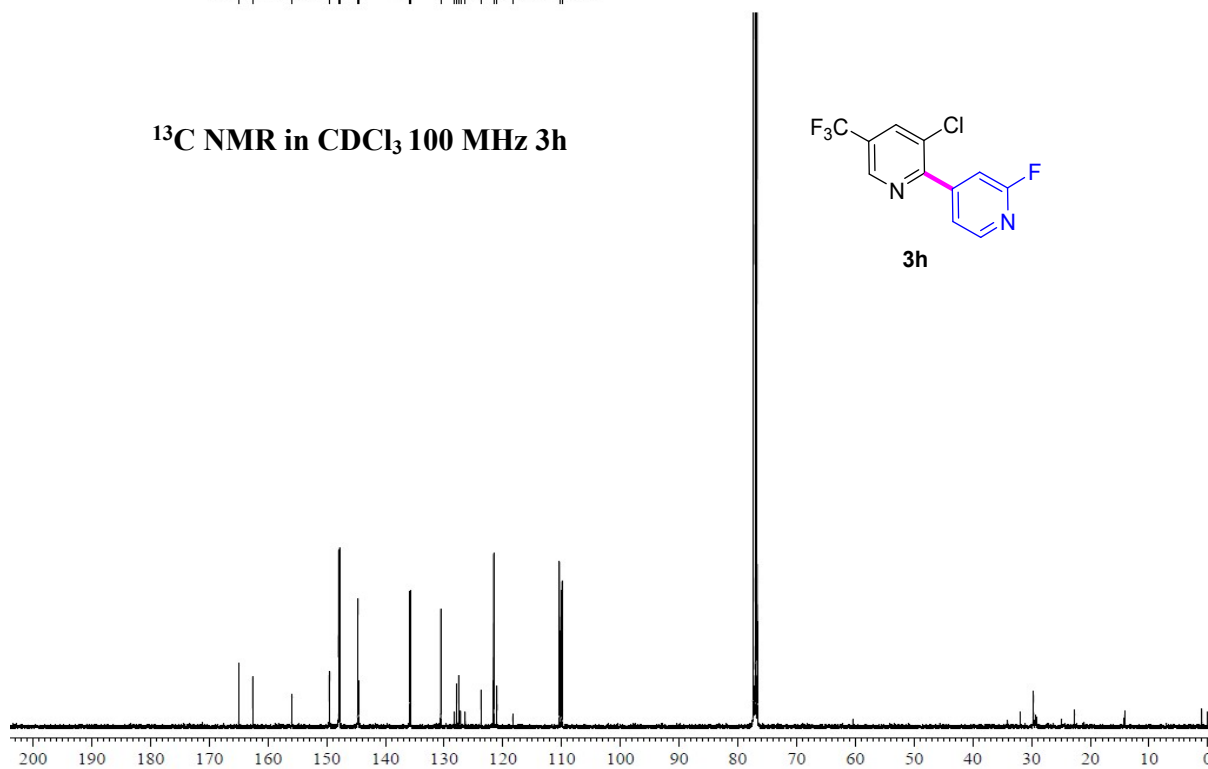

**<sup>19</sup>F NMR in CDCl<sub>3</sub> 376 MHz 3h**

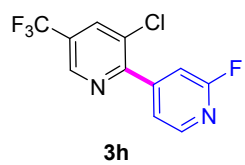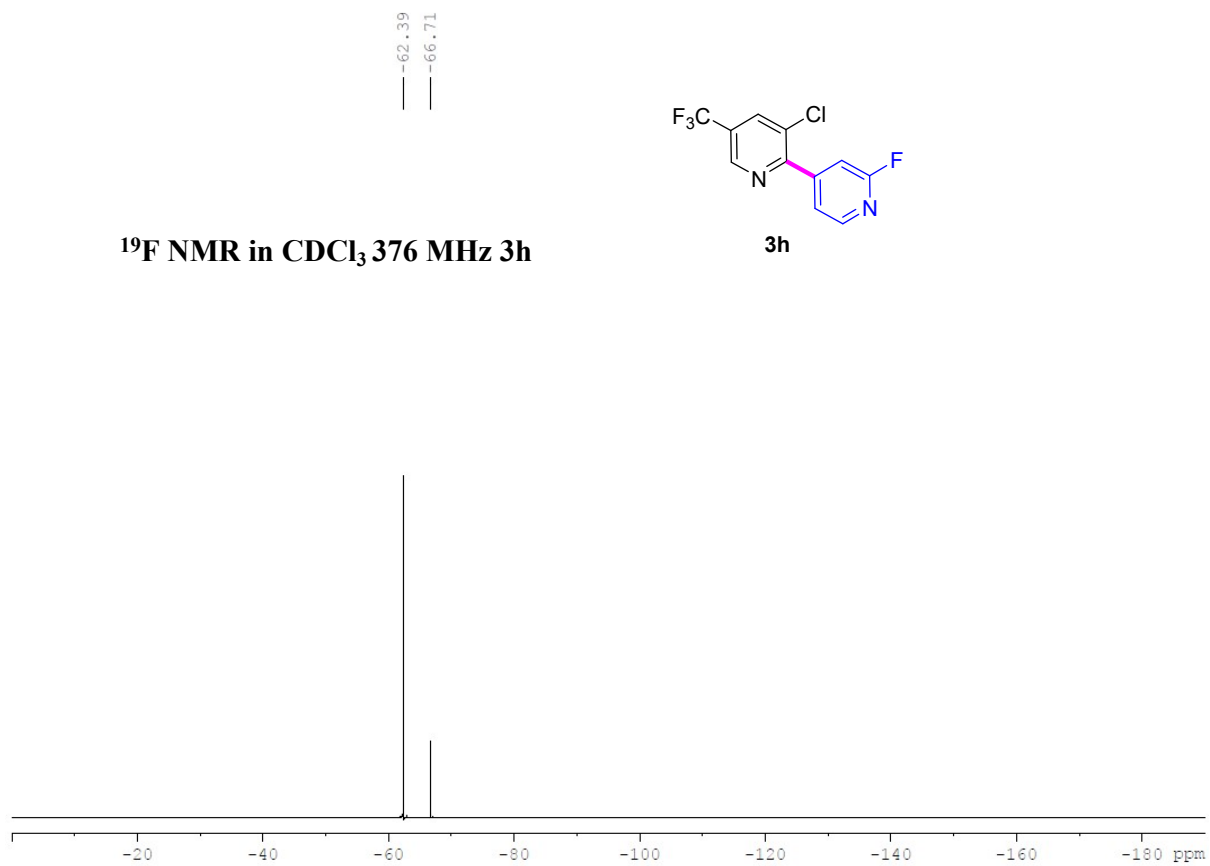

# $^1\text{H}$ , $^{13}\text{C}$ , and $^{19}\text{F}$ -NMR of Compound 3i

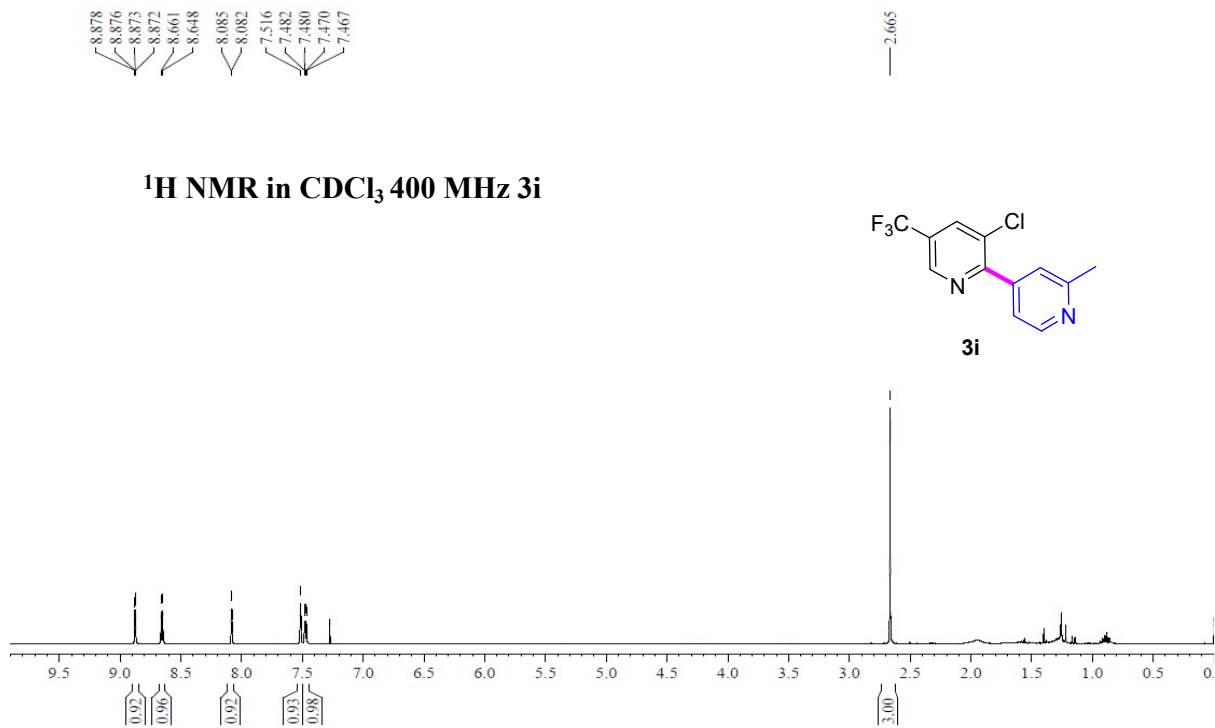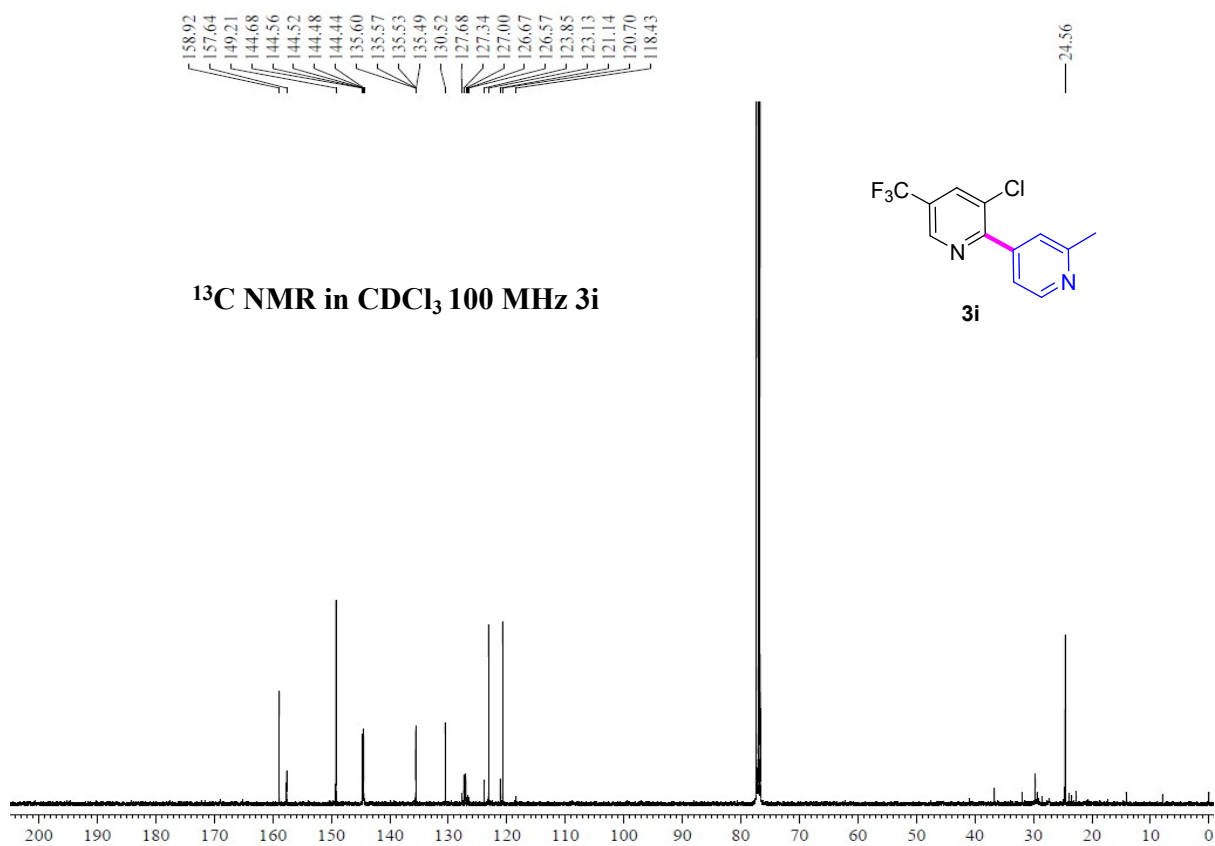



**$^{19}\text{F}$  NMR in  $\text{CDCl}_3$  376 MHz **3i****

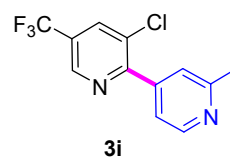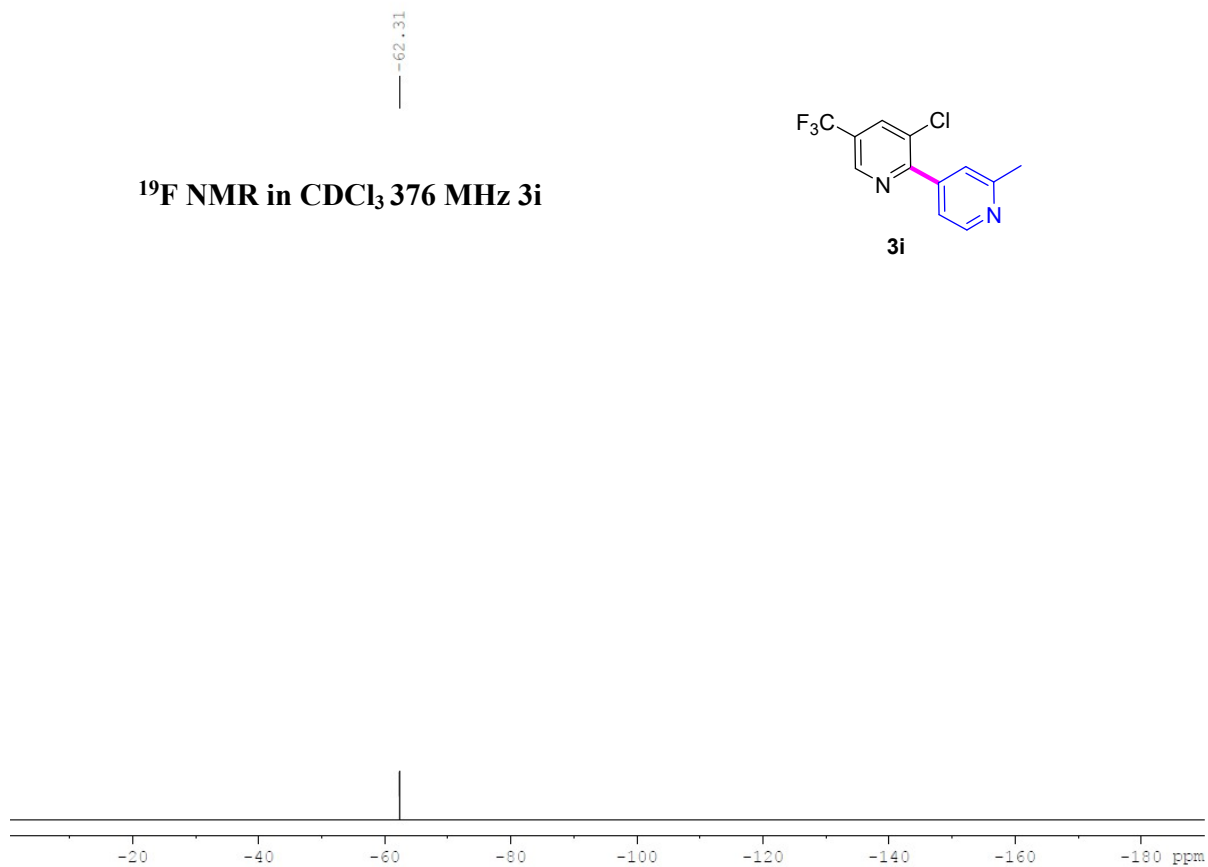

# $^1\text{H}$ and $^{13}\text{C}$ NMR of Compound 3j

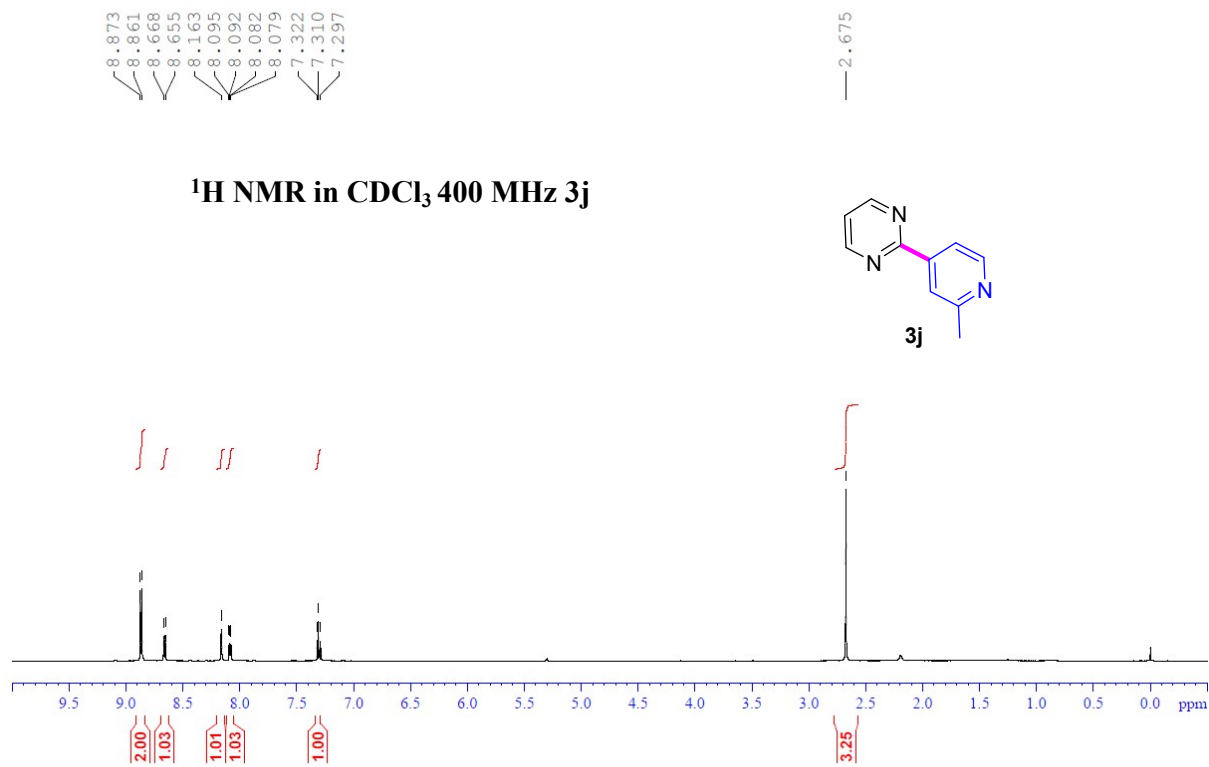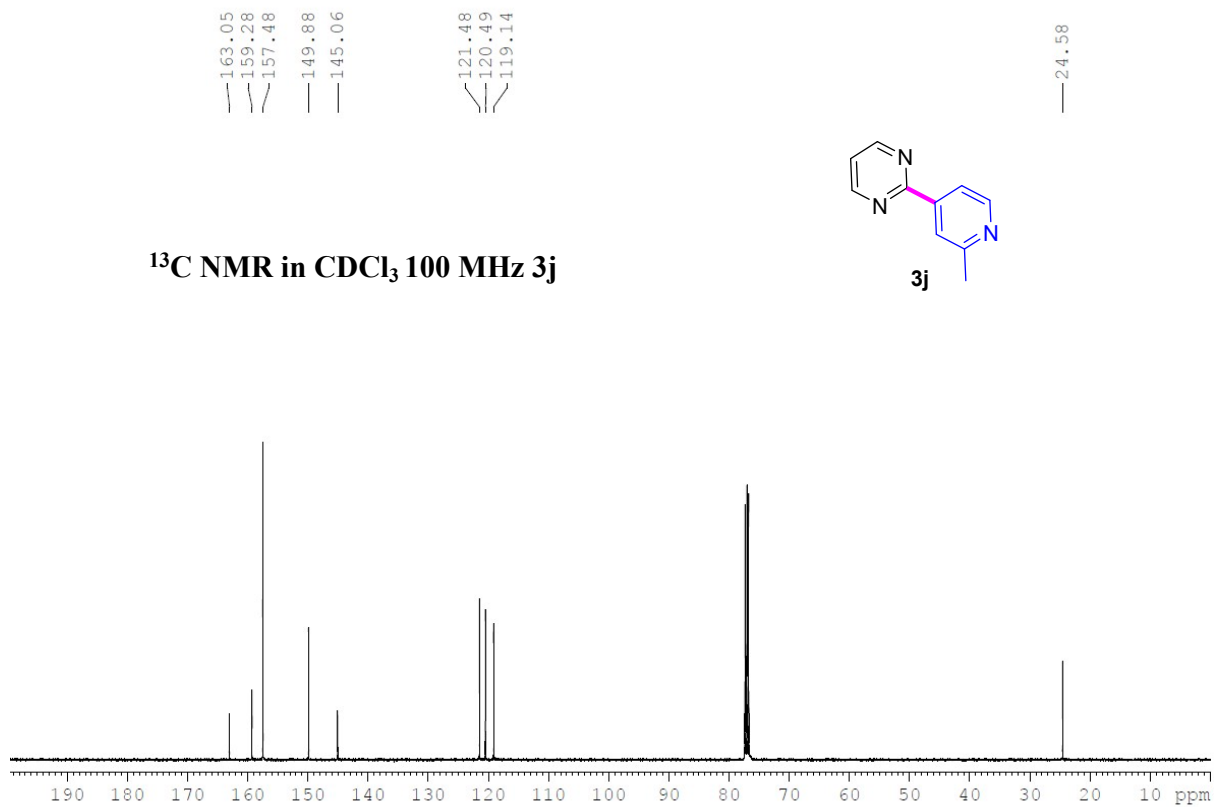

# <sup>1</sup>H and <sup>13</sup>C NMR of Compound 3k

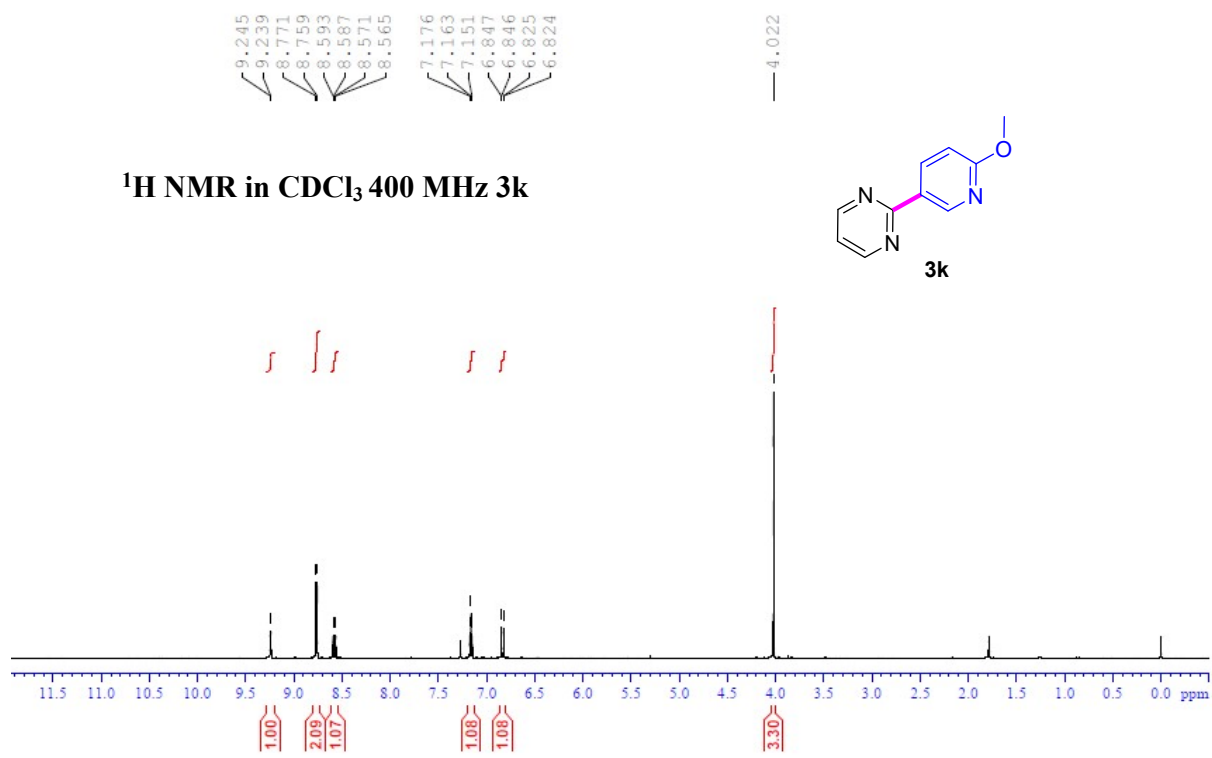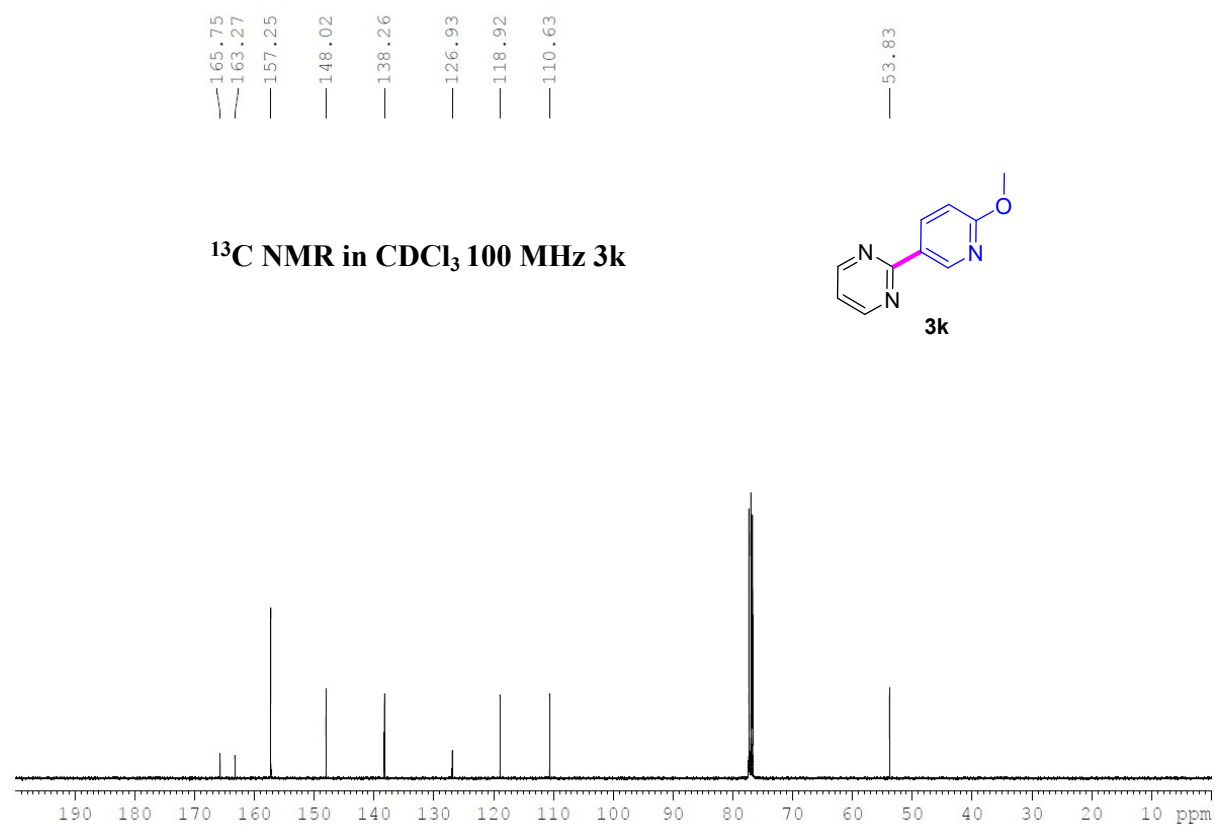

# <sup>1</sup>H and <sup>13</sup>C NMR of Compound 3I

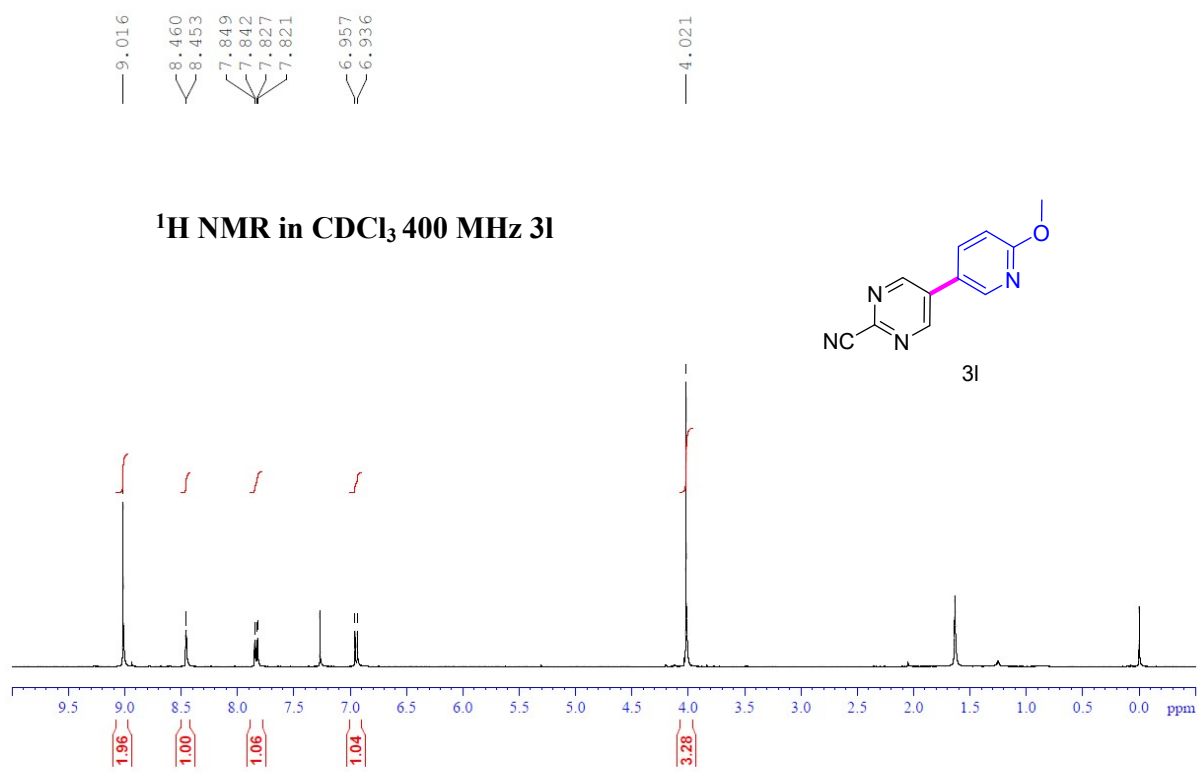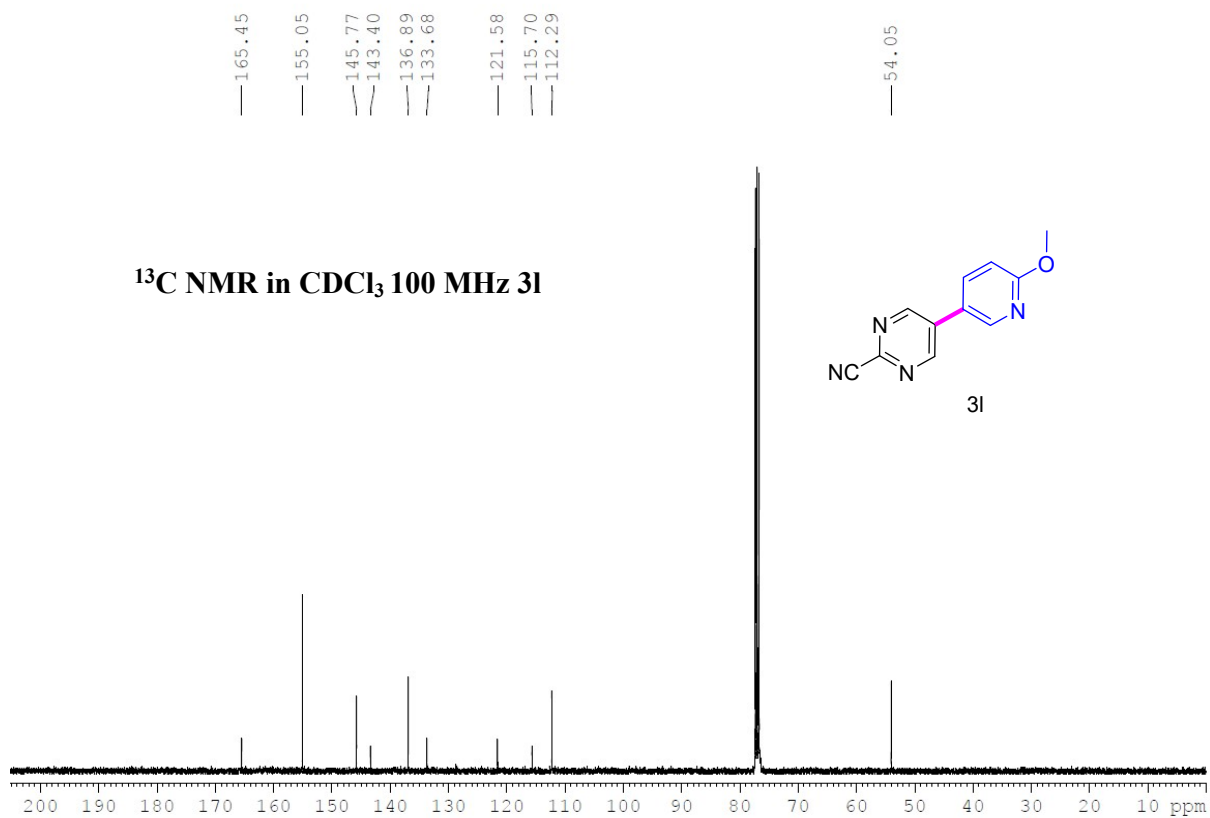

# $^1\text{H}$ and $^{13}\text{C}$ NMR of Compound 3m

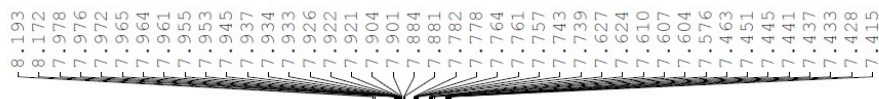

## $^1\text{H}$ NMR in $\text{CDCl}_3$ 400 MHz 3m

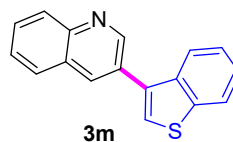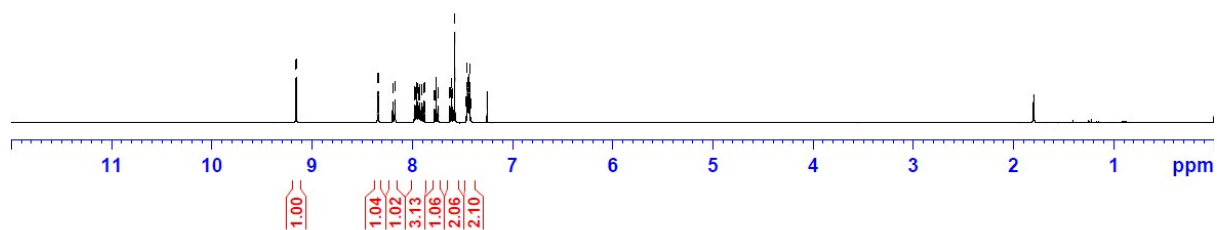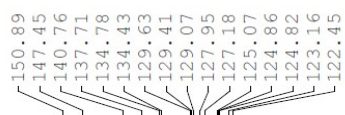

## $^{13}\text{C}$ NMR in $\text{CDCl}_3$ 100 MHz 3m

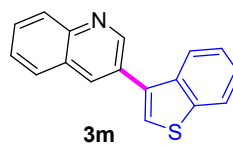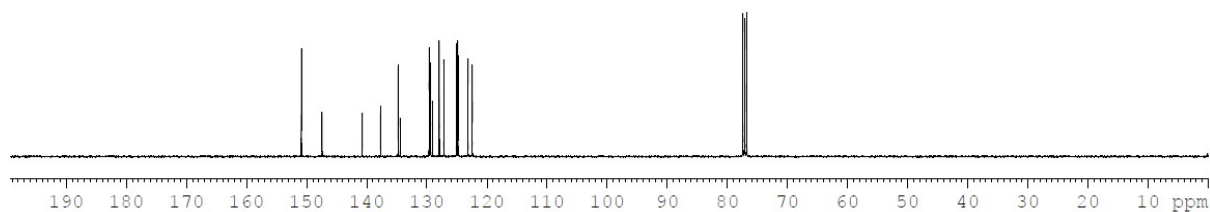

# $^1\text{H}$ and $^{13}\text{C}$ NMR of Compound 3n

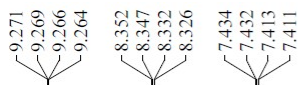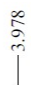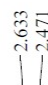

## $^1\text{H}$ NMR in $\text{CDCl}_3$ 400 MHz 3n

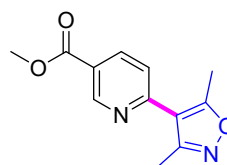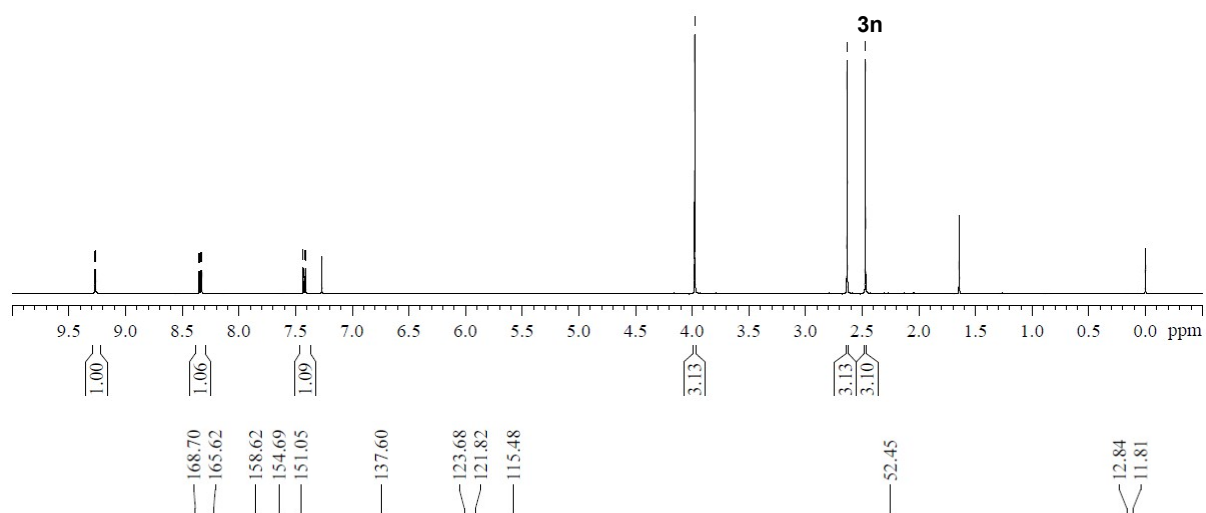

## $^{13}\text{C}$ NMR in $\text{CDCl}_3$ 100 MHz 3n

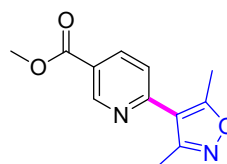

3n

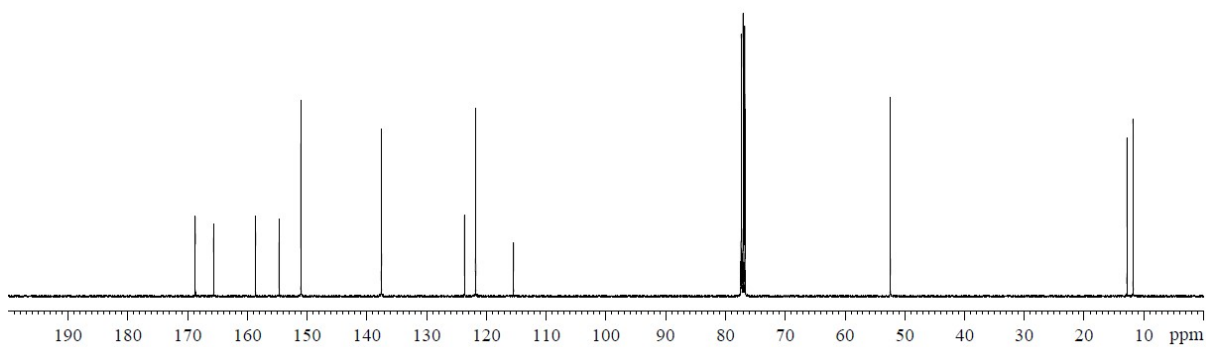

# $^1\text{H}$ and $^{13}\text{C}$ NMR of Compound 3o

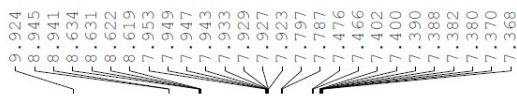

## $^1\text{H}$ NMR in $\text{CDCl}_3$ 400 MHz 3o

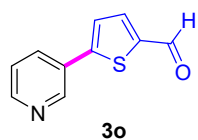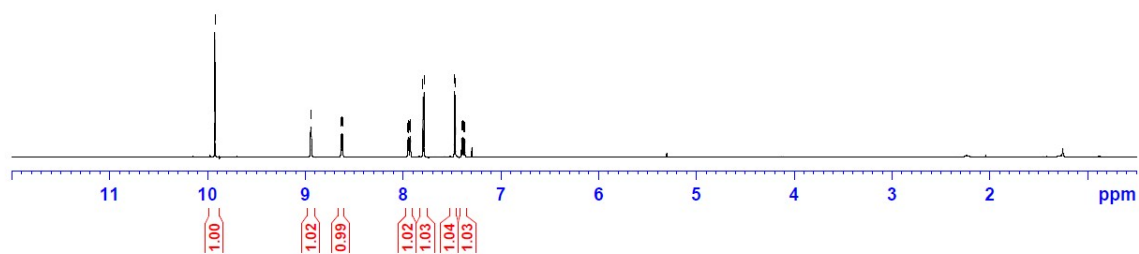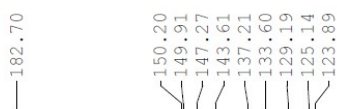

## $^{13}\text{C}$ NMR in $\text{CDCl}_3$ 100 MHz 3o

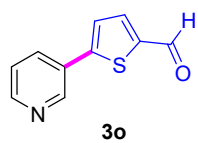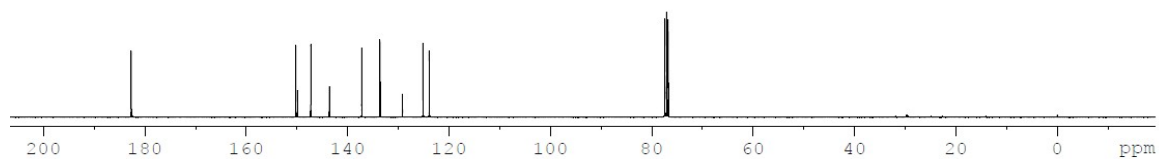

# $^1\text{H}$ , $^{13}\text{C}$ , and $^{19}\text{F}$ -NMR of Compound 3p

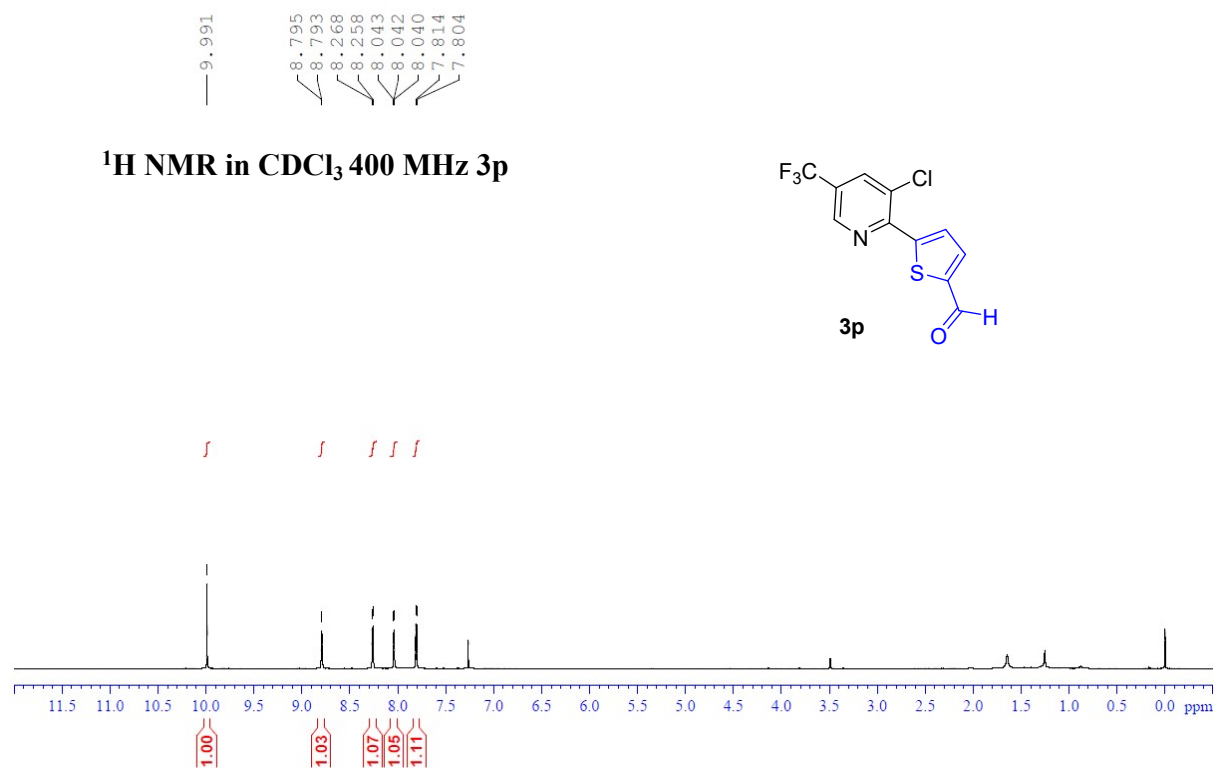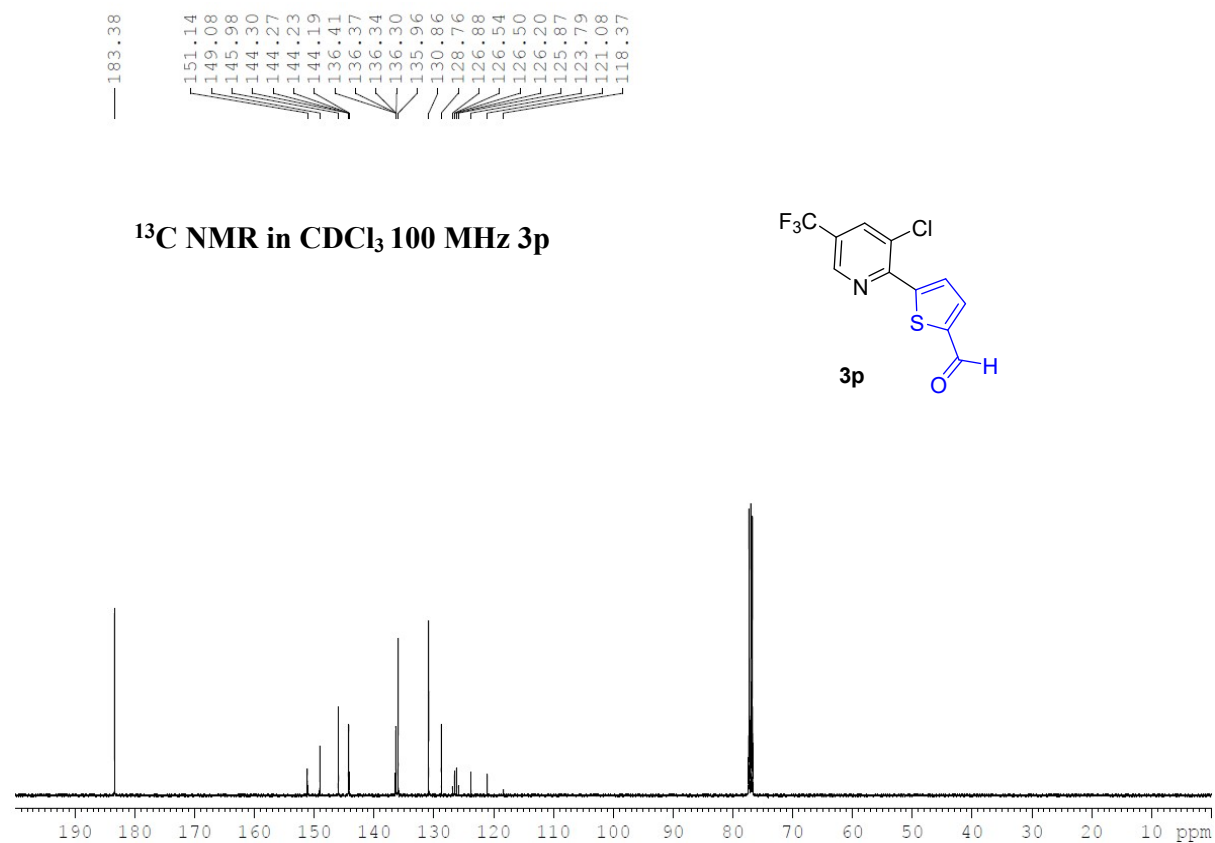



**$^{19}\text{F}$  NMR in  $\text{CDCl}_3$  376 MHz 3p**

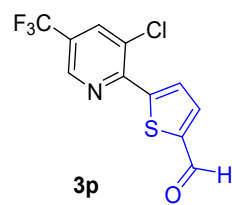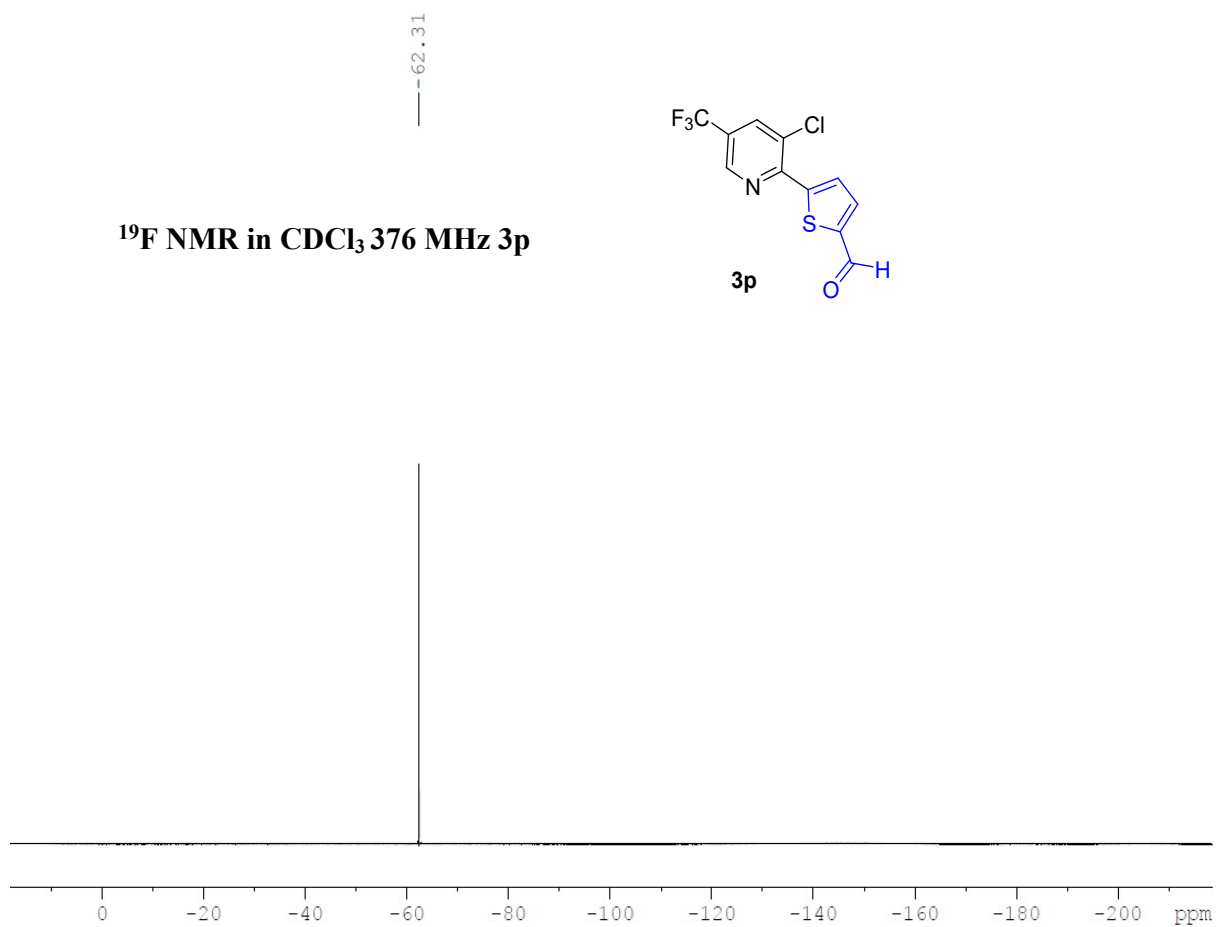

# $^1\text{H}$ and $^{13}\text{C}$ NMR of Compound 3q

9.961  
9.231  
9.028  
7.833  
7.824  
7.525  
7.515

## $^1\text{H}$ NMR in $\text{CDCl}_3$ 400 MHz 3q

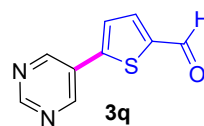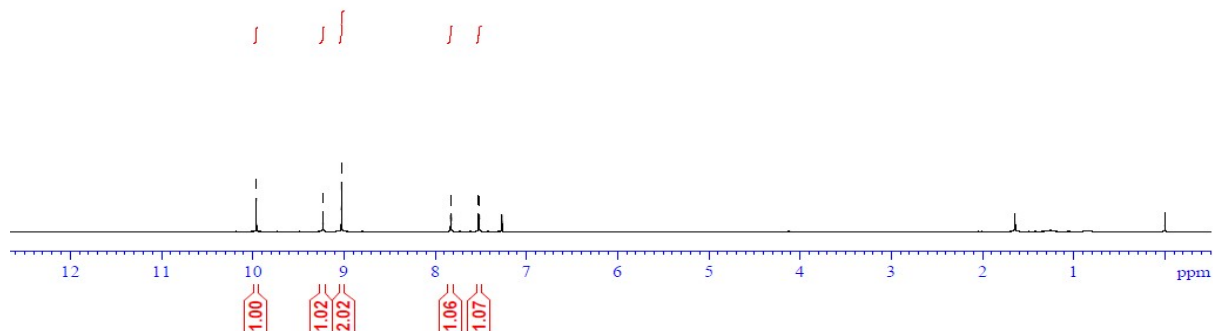

177.85  
153.95  
149.25  
140.63  
139.98  
132.26  
122.87  
121.34

## $^{13}\text{C}$ NMR in $\text{CDCl}_3$ 100 MHz 3q

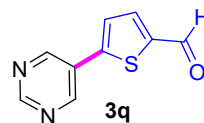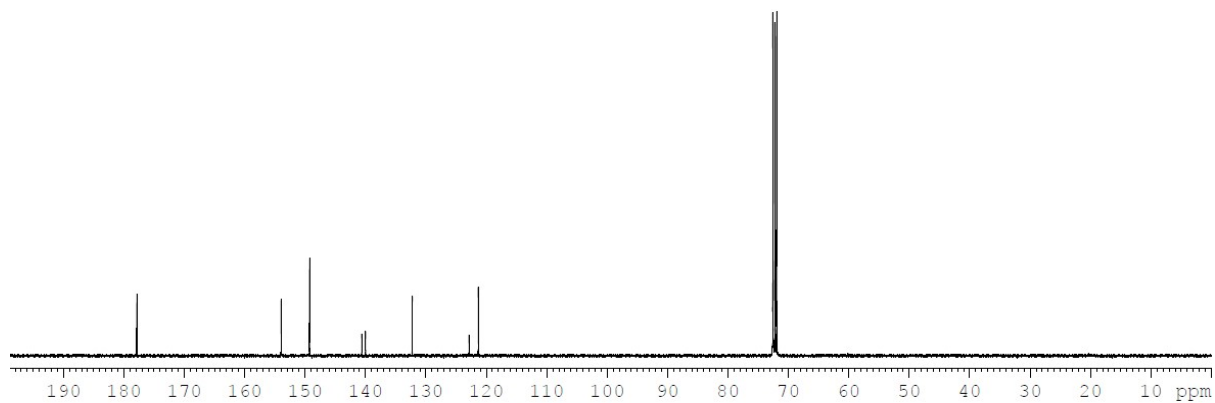

# $^1\text{H}$ and $^{13}\text{C}$ NMR of Compound 3r

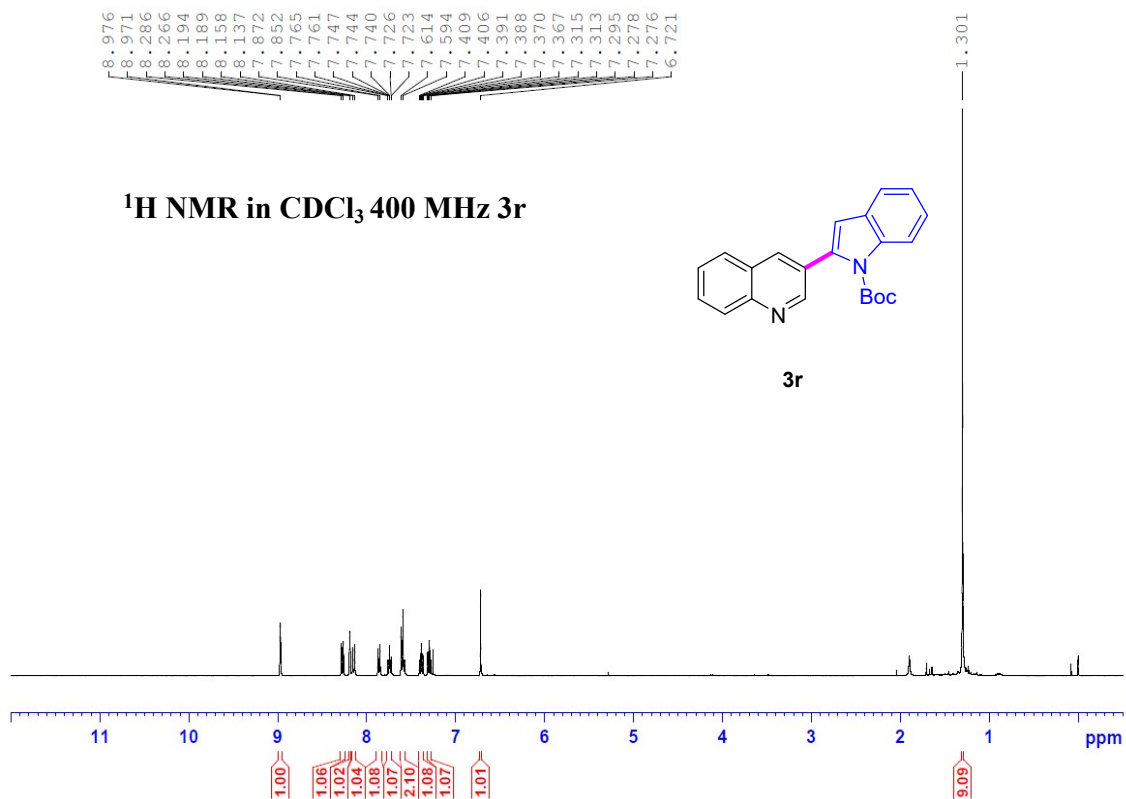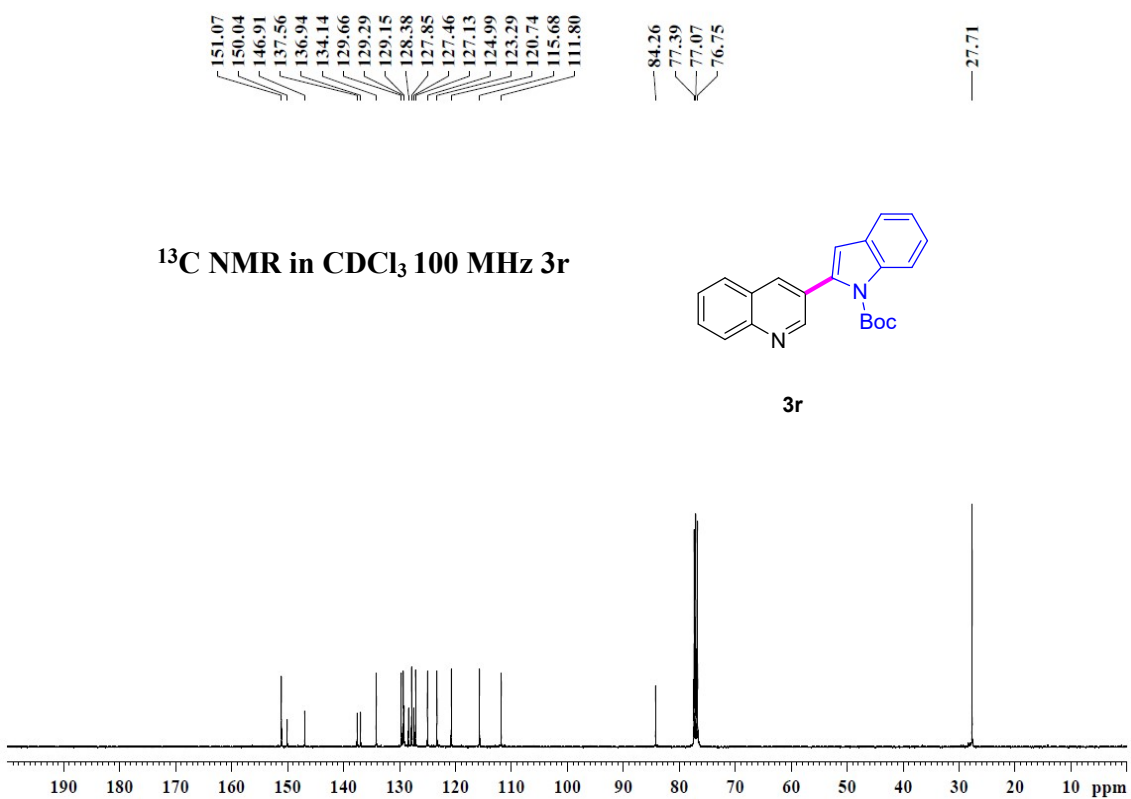

# $^1\text{H}$ and $^{13}\text{C}$ NMR of Compound 3s

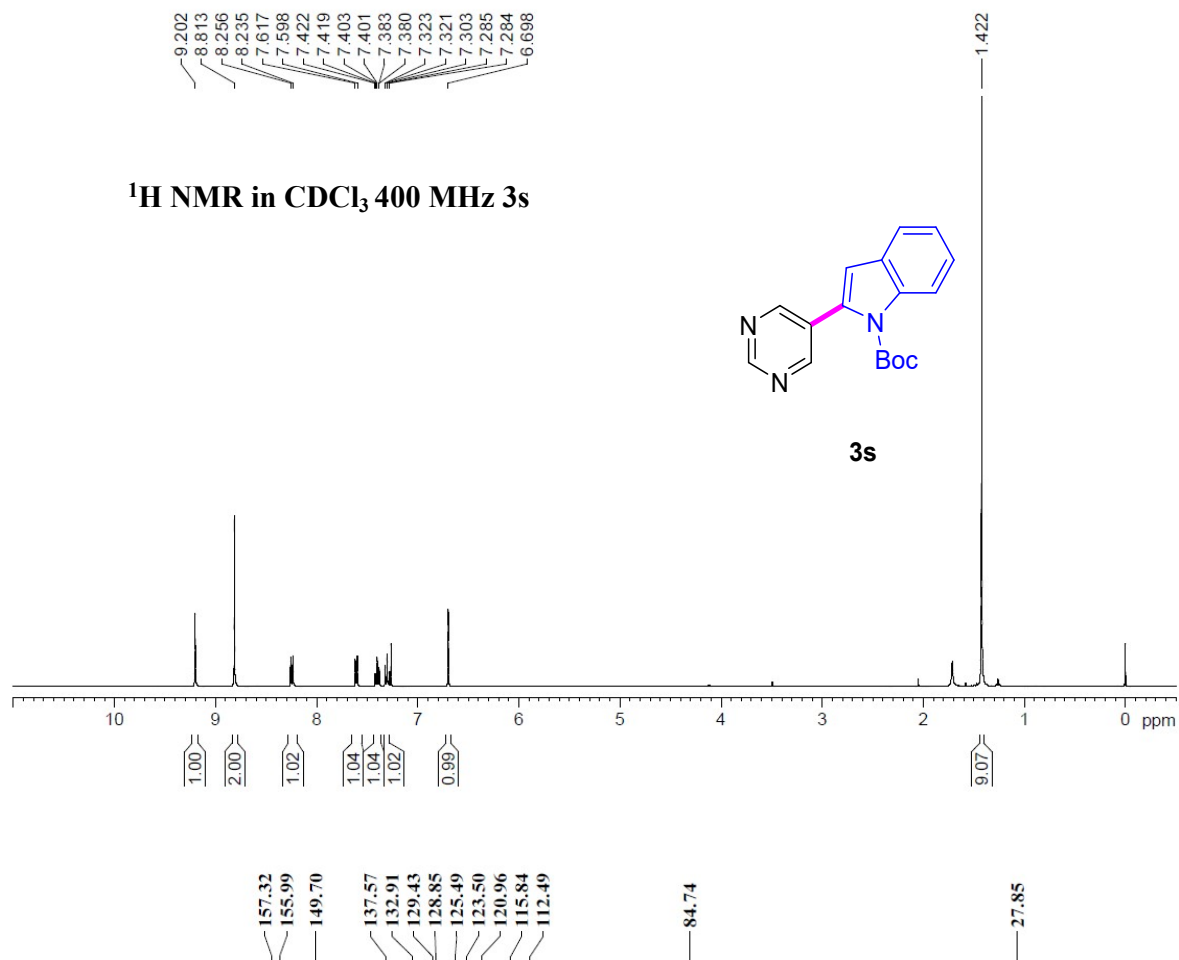

# $^1\text{H}$ and $^{13}\text{C}$ NMR of Compound 3t

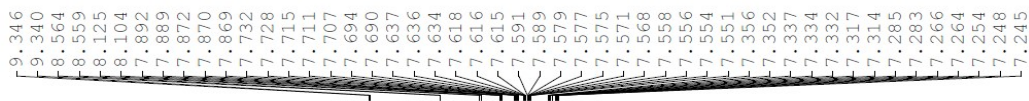

## $^1\text{H}$ NMR in $\text{CDCl}_3$ 400 MHz 3t

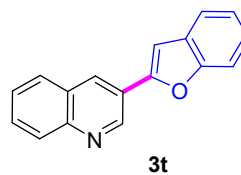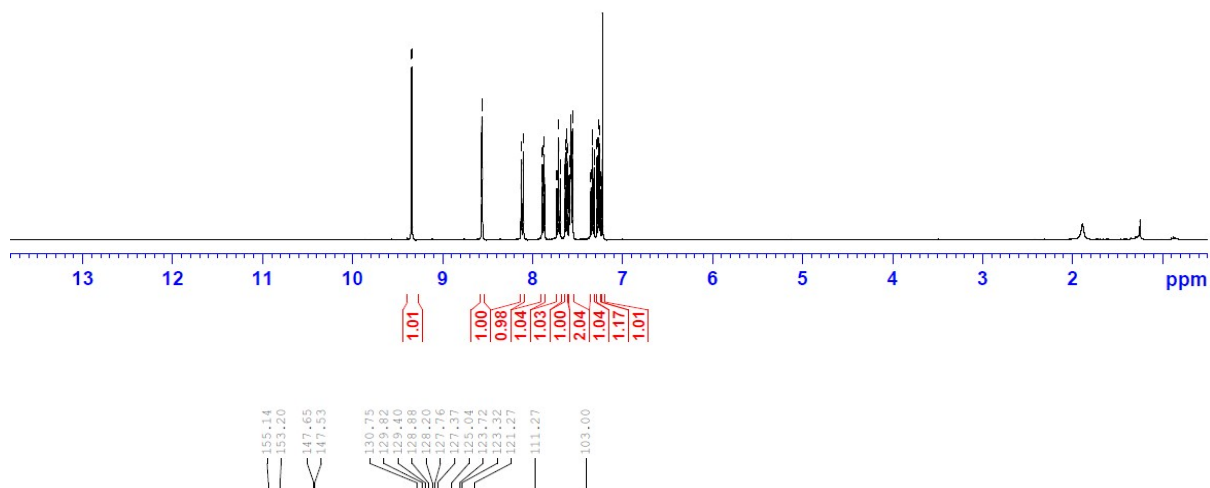

## $^{13}\text{C}$ NMR in $\text{CDCl}_3$ 100 MHz 3t

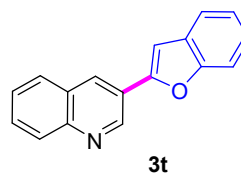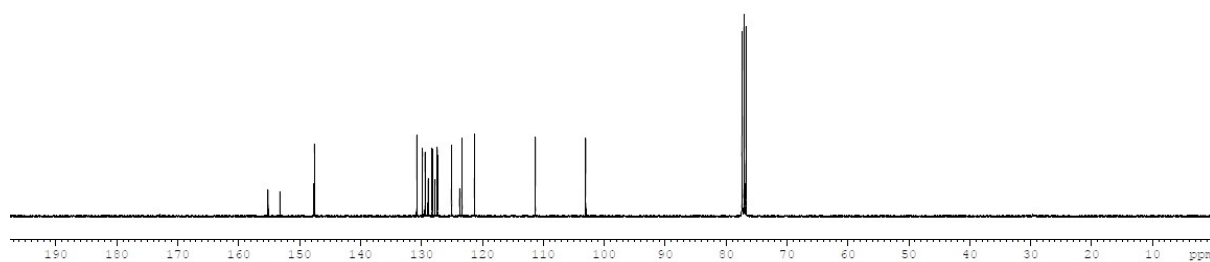

# $^1\text{H}$ , $^{13}\text{C}$ , and $^{19}\text{F}$ -NMR of Compound 3u

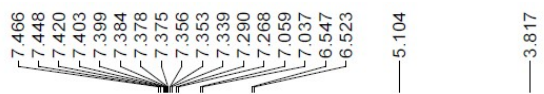

## $^1\text{H}$ NMR in $\text{CDCl}_3$ 400 MHz 3u

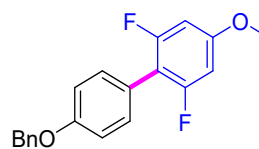

3u

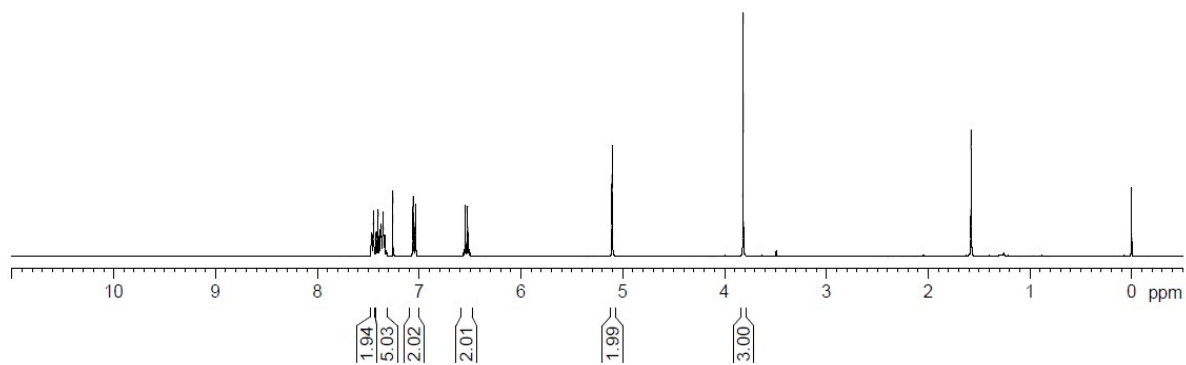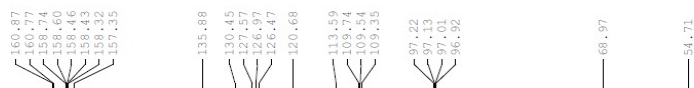

## $^{13}\text{C}$ NMR in $\text{CDCl}_3$ 100 MHz 3u

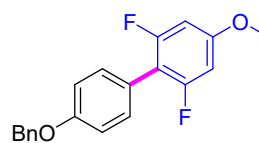

3u

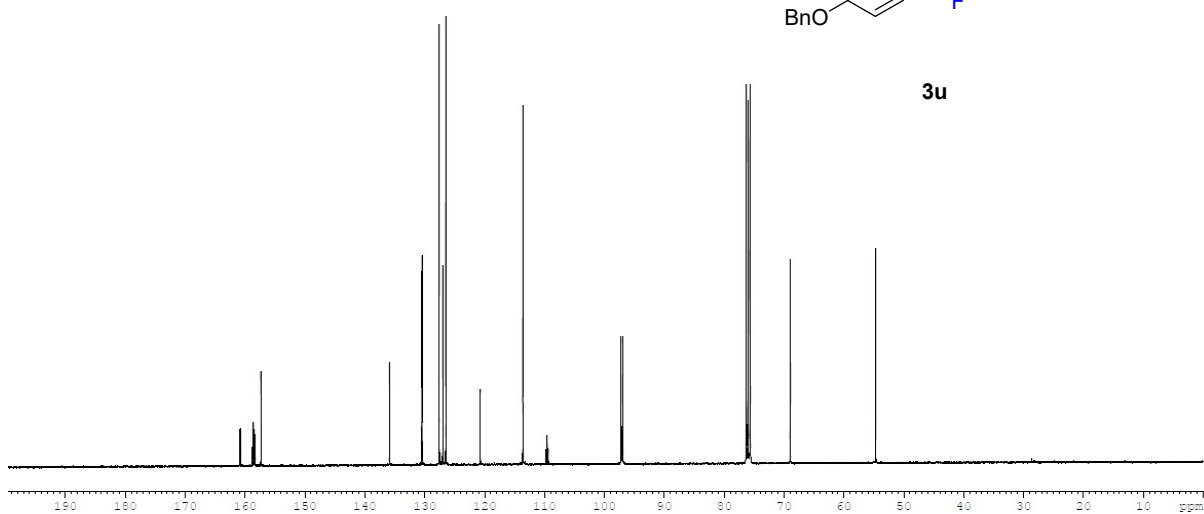

---113.79

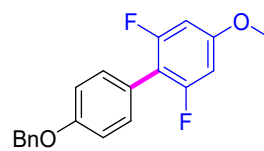

**3u**

**$^{19}\text{F}$  NMR in  $\text{CDCl}_3$  376 MHz 3u**

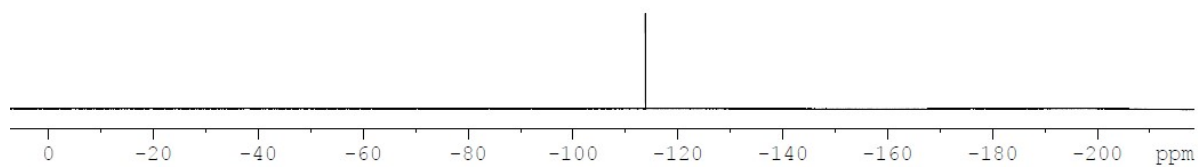

# <sup>1</sup>H, <sup>13</sup>C, and <sup>19</sup>F-NMR of Compound 4a

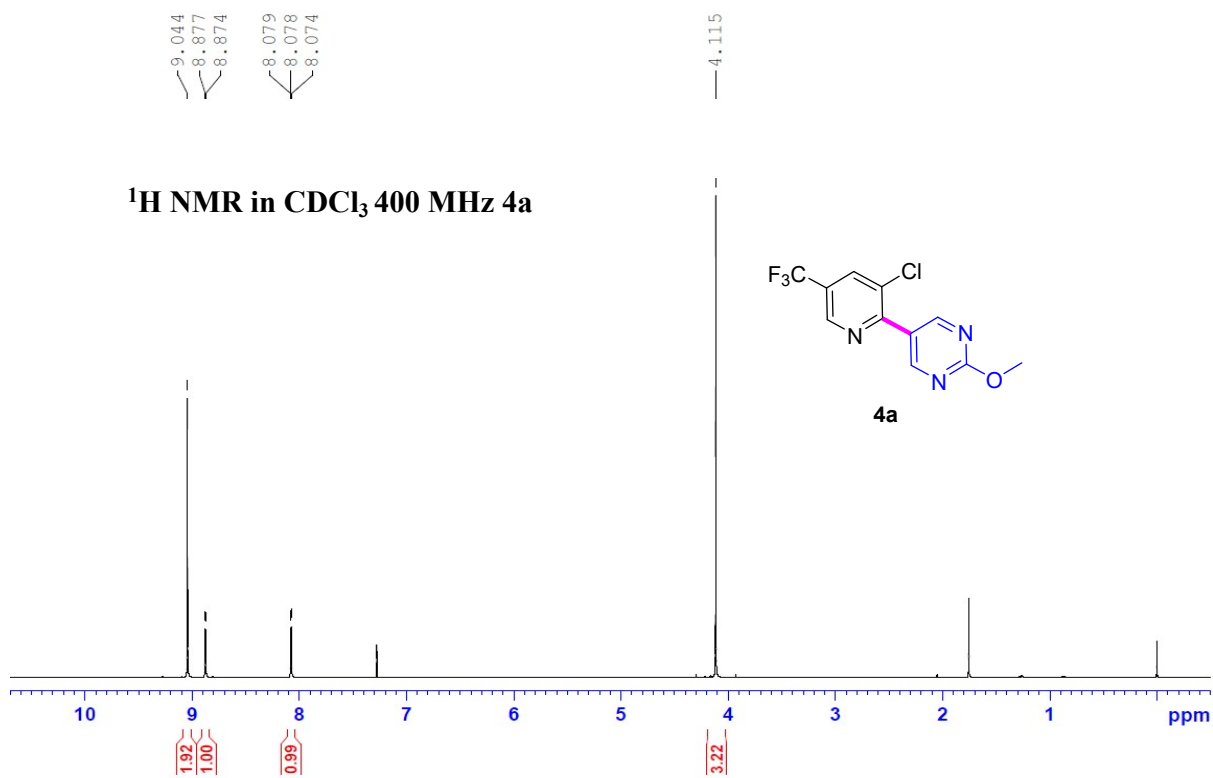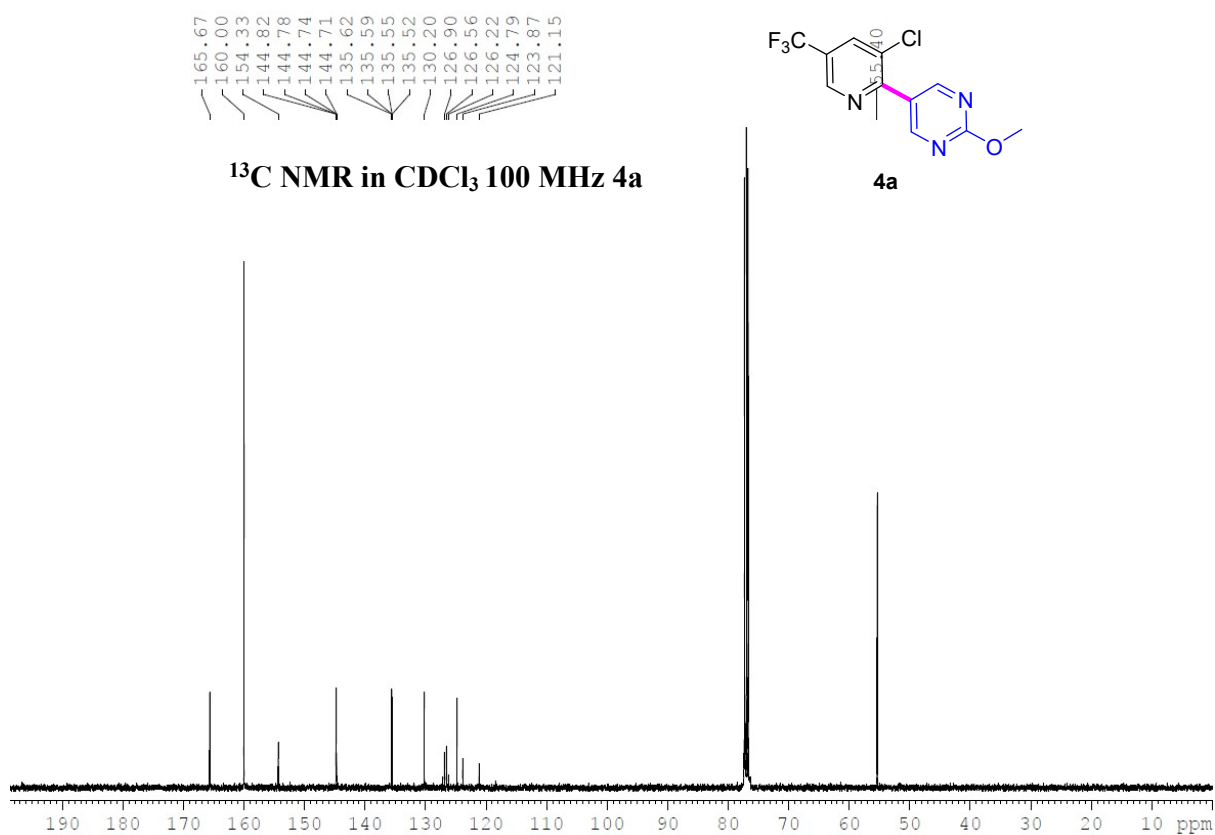



**$^{19}\text{F}$  NMR in  $\text{CDCl}_3$  376 MHz 4a**

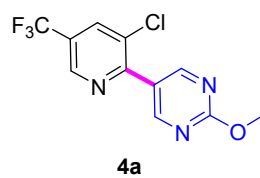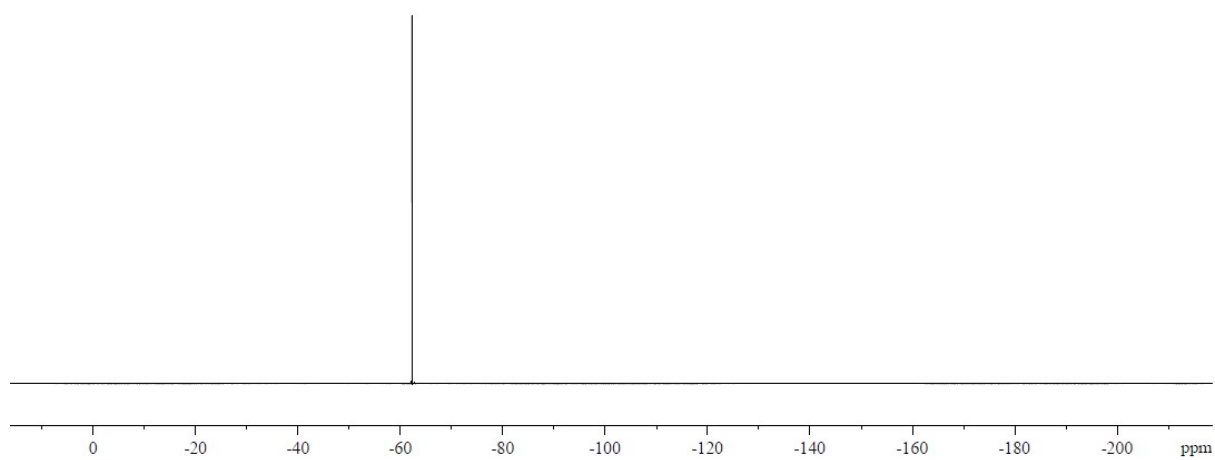

# <sup>1</sup>H and <sup>13</sup>C NMR of Compound 4b

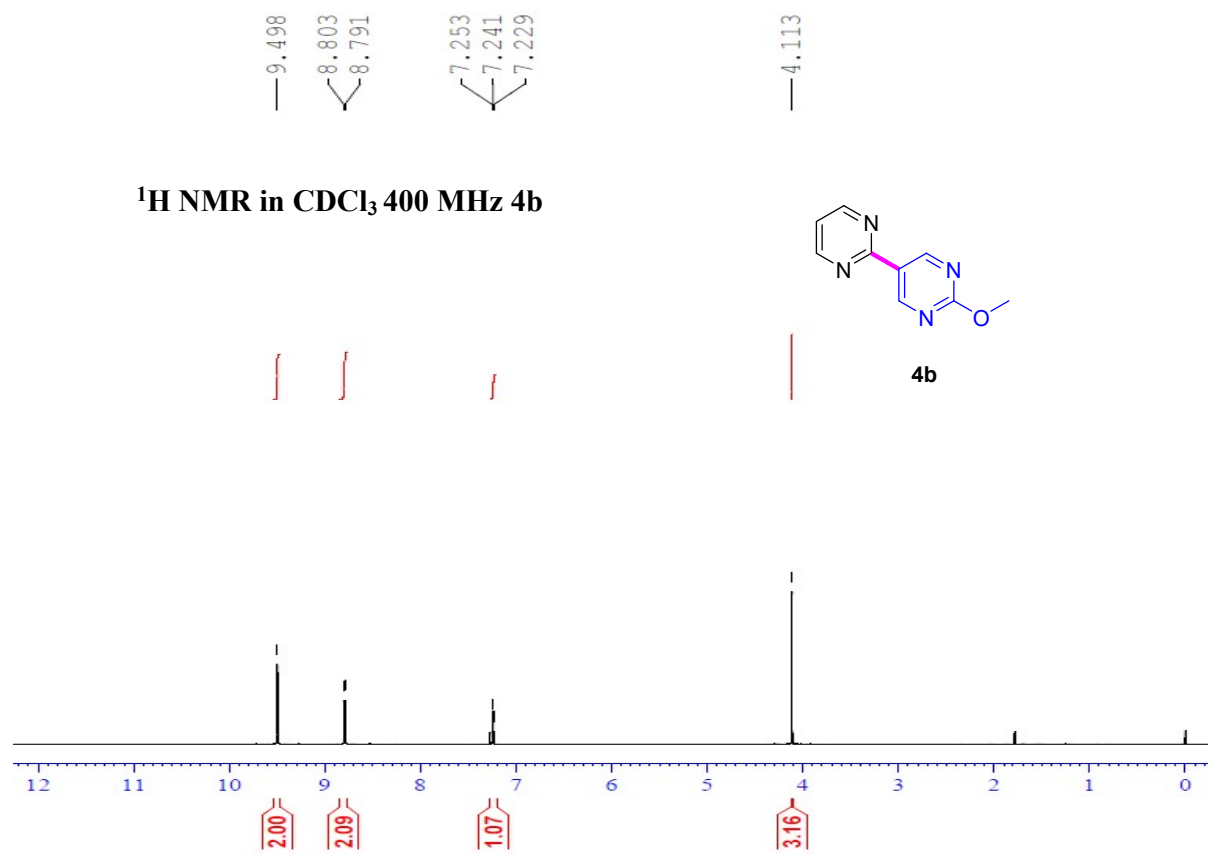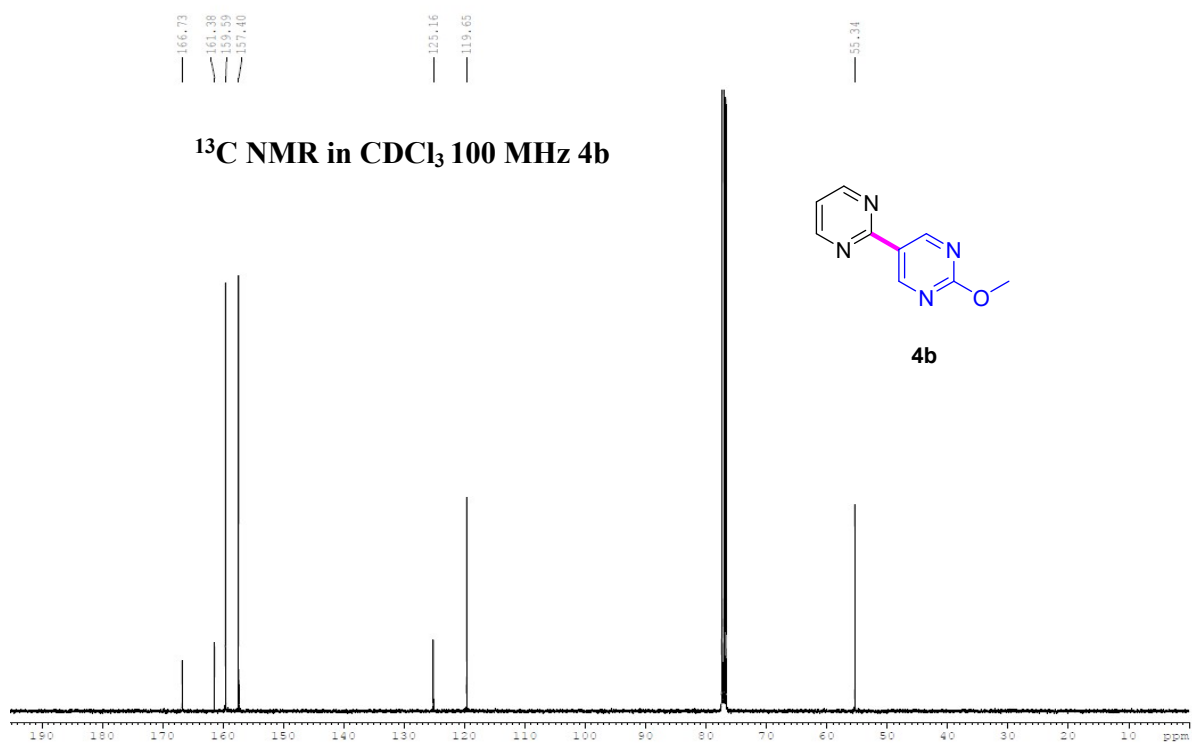

# <sup>1</sup>H and <sup>13</sup>C NMR of Compound 4c

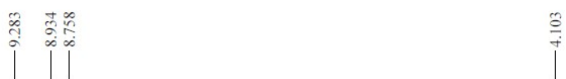

## <sup>1</sup>H NMR in CDCl<sub>3</sub> 400 MHz 4c

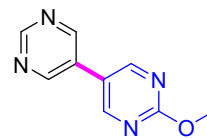

4c

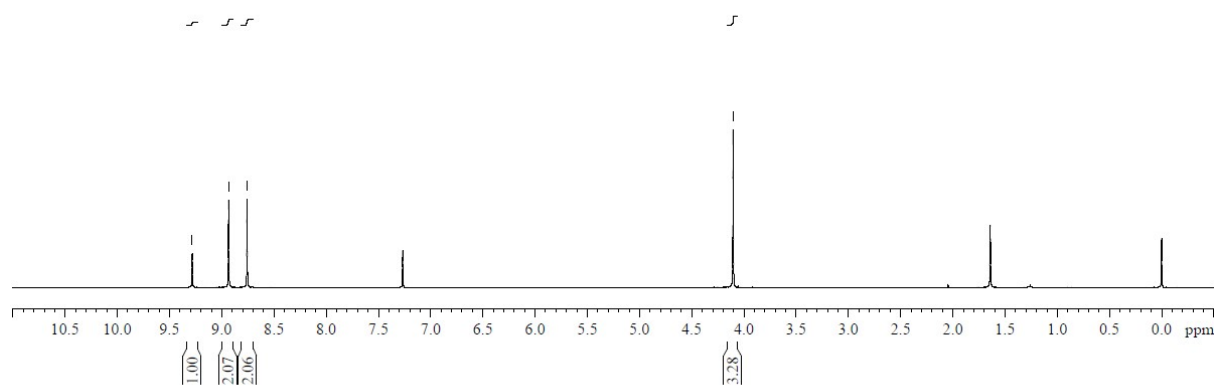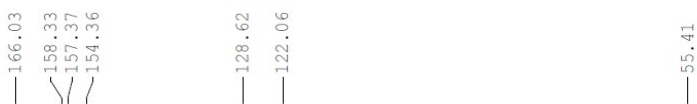

## <sup>13</sup>C NMR in CDCl<sub>3</sub> 100 MHz 4c

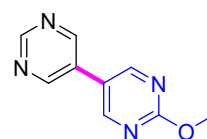

4c

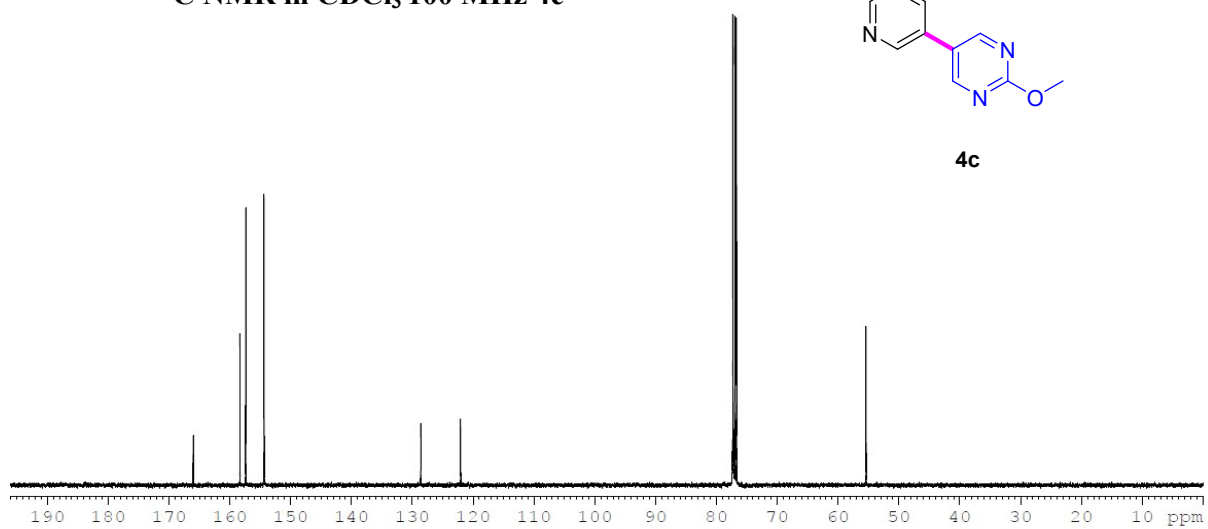

# $^1\text{H}$ and $^{13}\text{C}$ NMR of Compound 4d

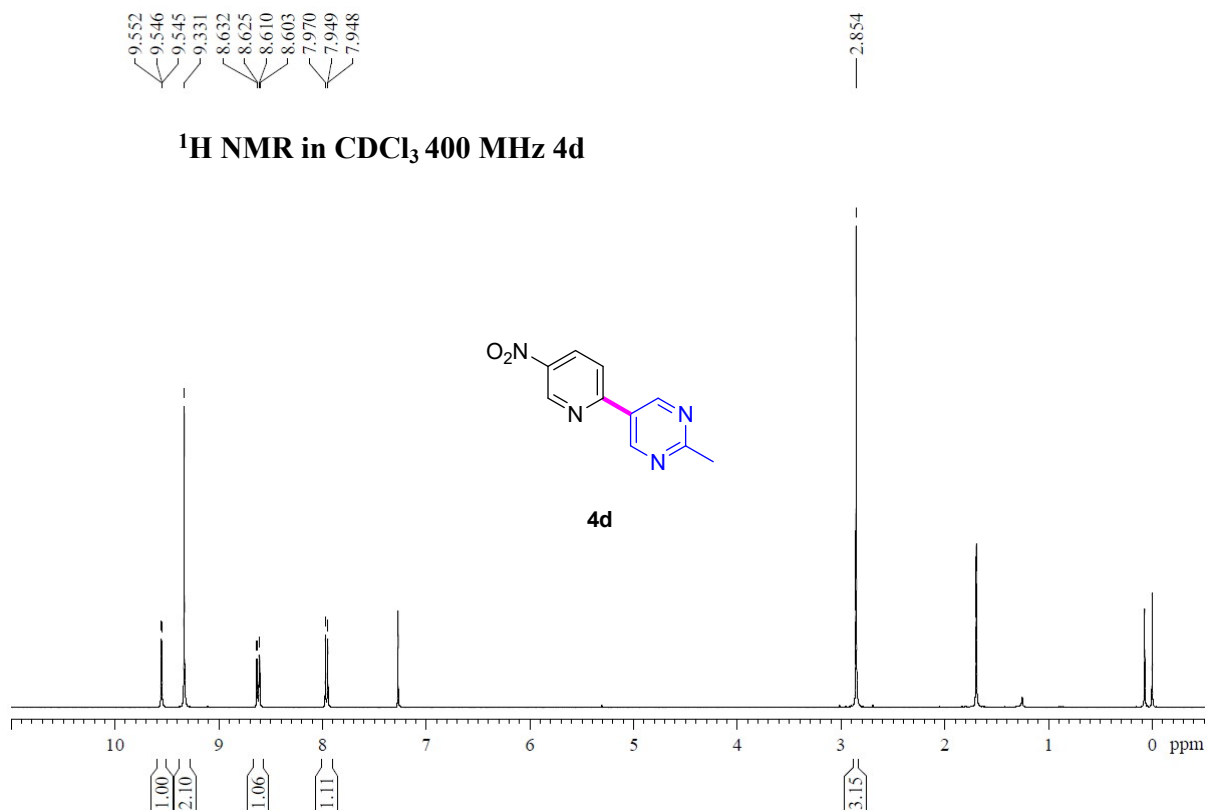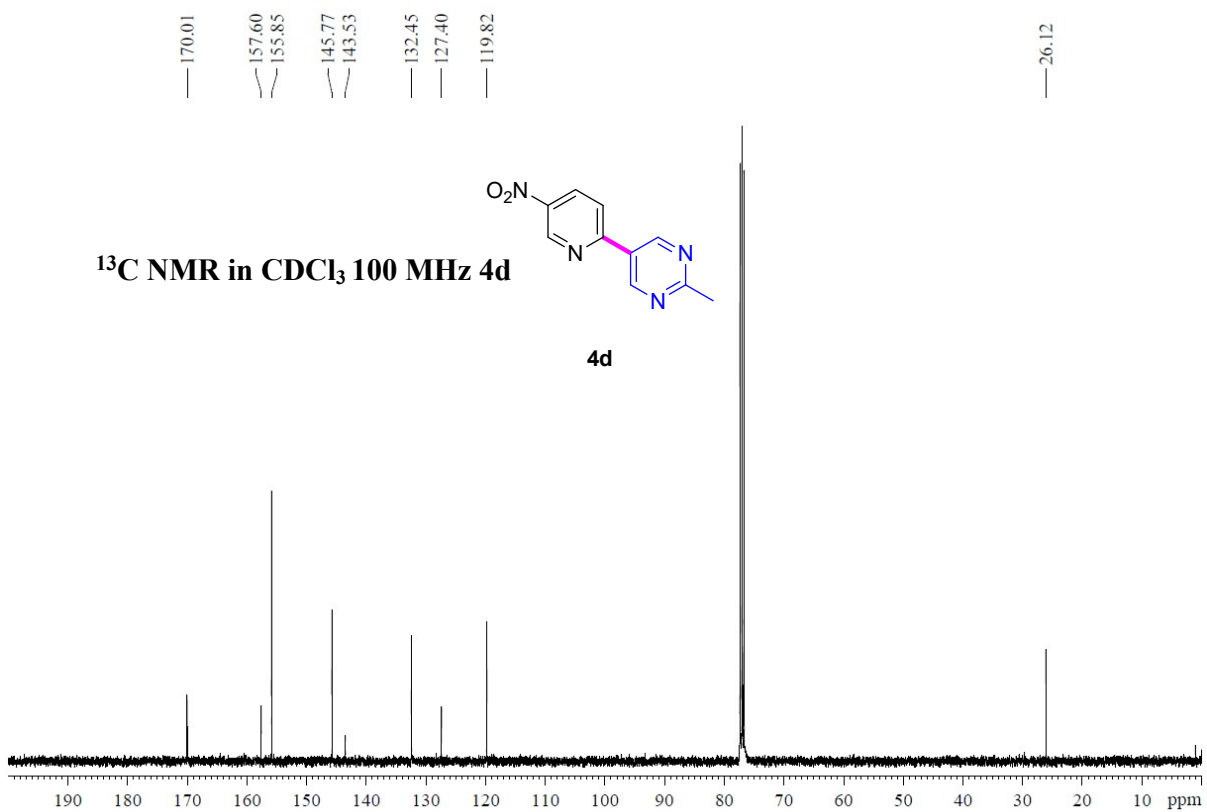

# $^1\text{H}$ and $^{13}\text{C}$ NMR of Compound 4e

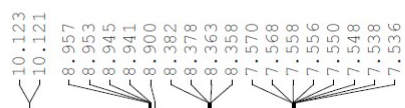

## $^1\text{H}$ NMR in $\text{CDCl}_3$ 400 MHz 4e

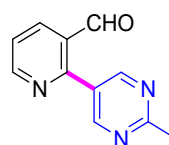

4e

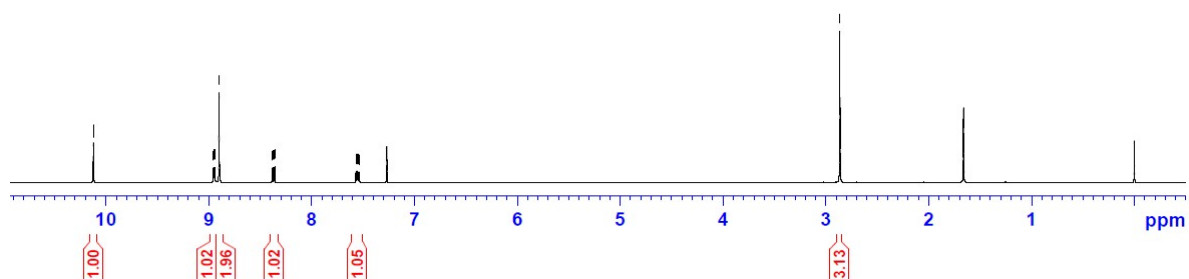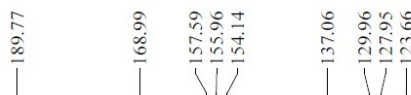

## $^{13}\text{C}$ NMR in $\text{CDCl}_3$ 100 MHz 4e

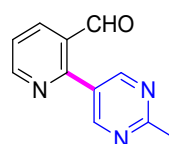

4e

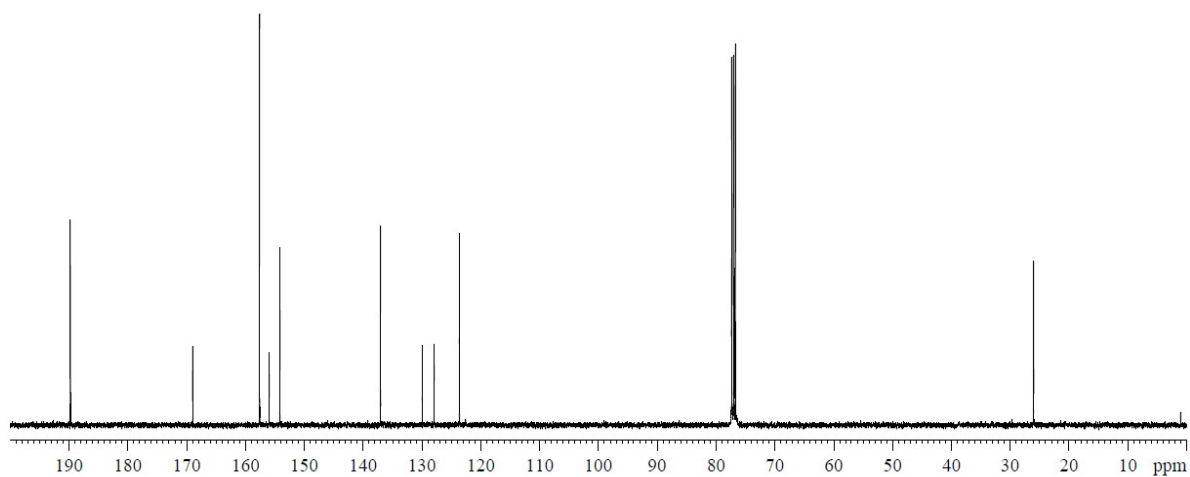

# <sup>1</sup>H and <sup>13</sup>C NMR of Compound 4f

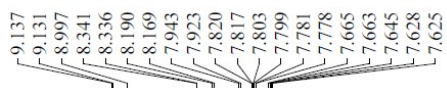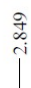

## <sup>1</sup>H NMR in CDCl<sub>3</sub> 400 MHz 4f

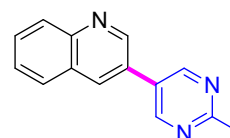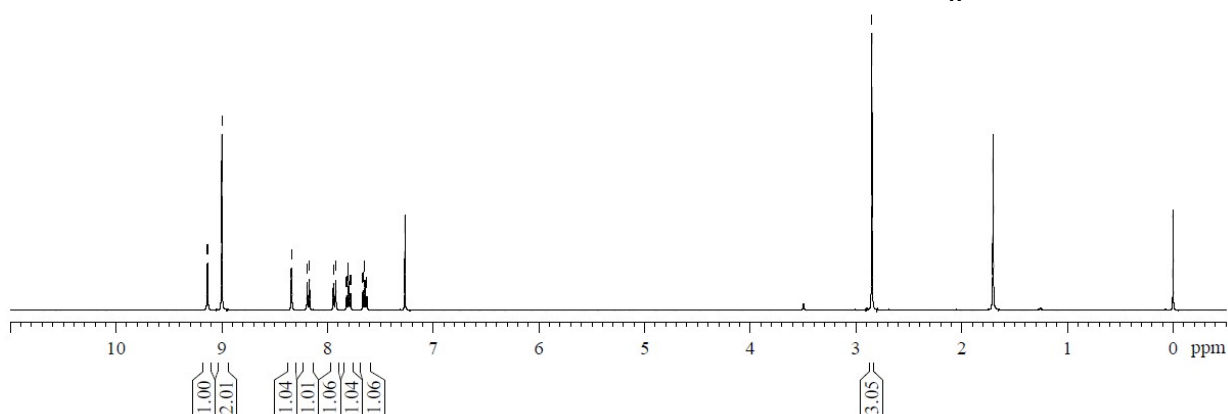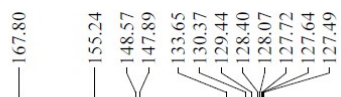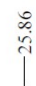

## <sup>13</sup>C NMR in CDCl<sub>3</sub> 100 MHz 4f

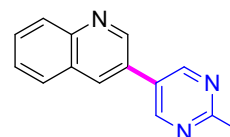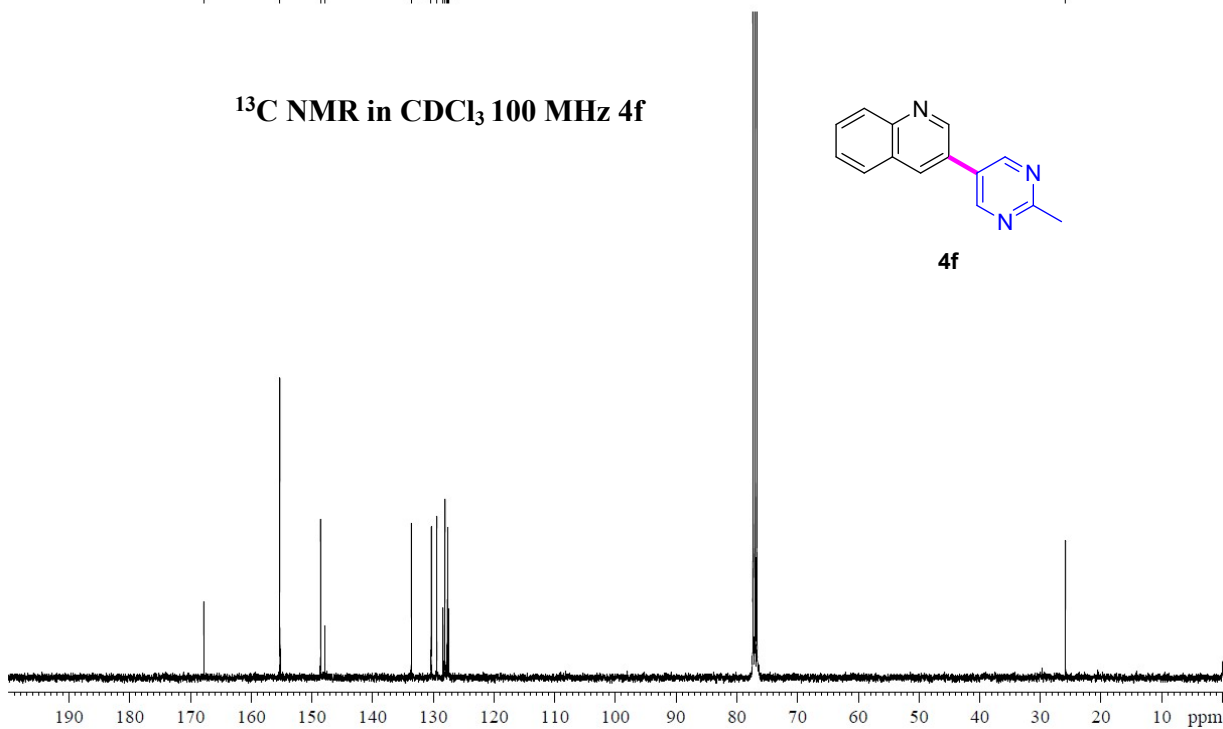

# <sup>1</sup>H and <sup>13</sup>C NMR of Compound 4g

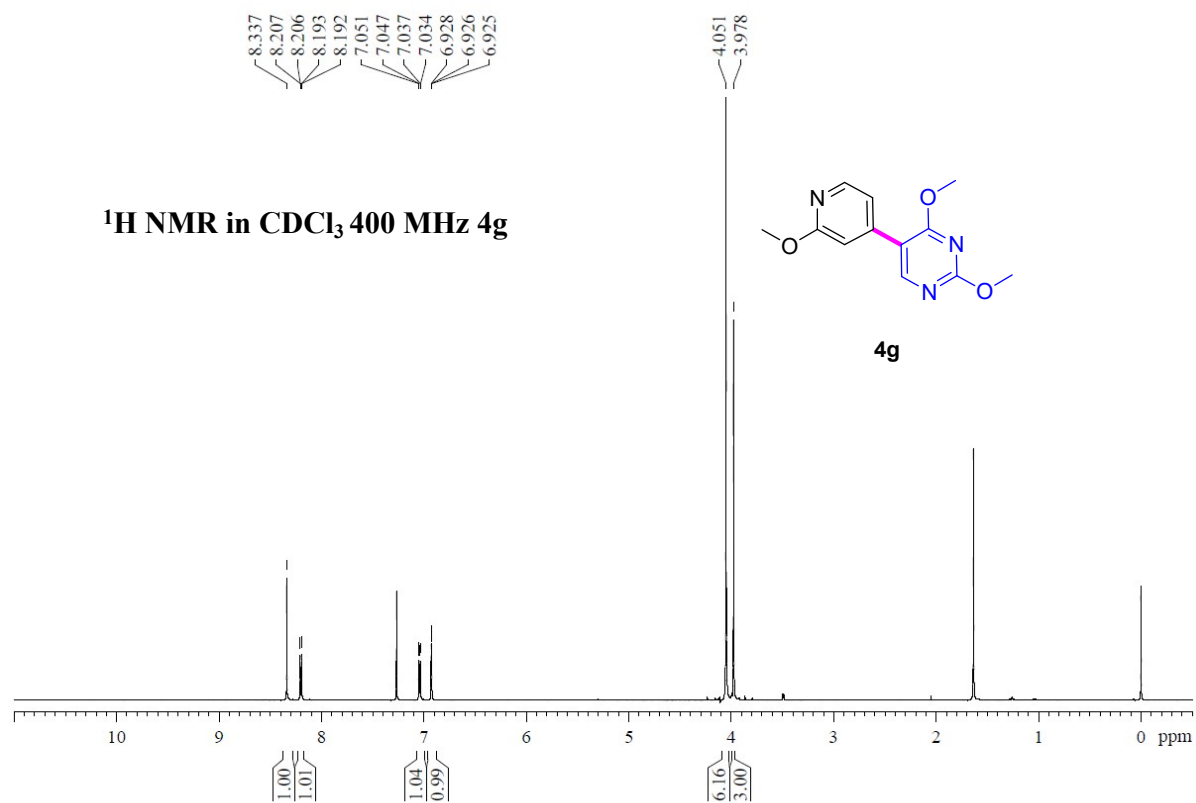

# <sup>13</sup>C NMR in CDCl<sub>3</sub> 100 MHz 4g

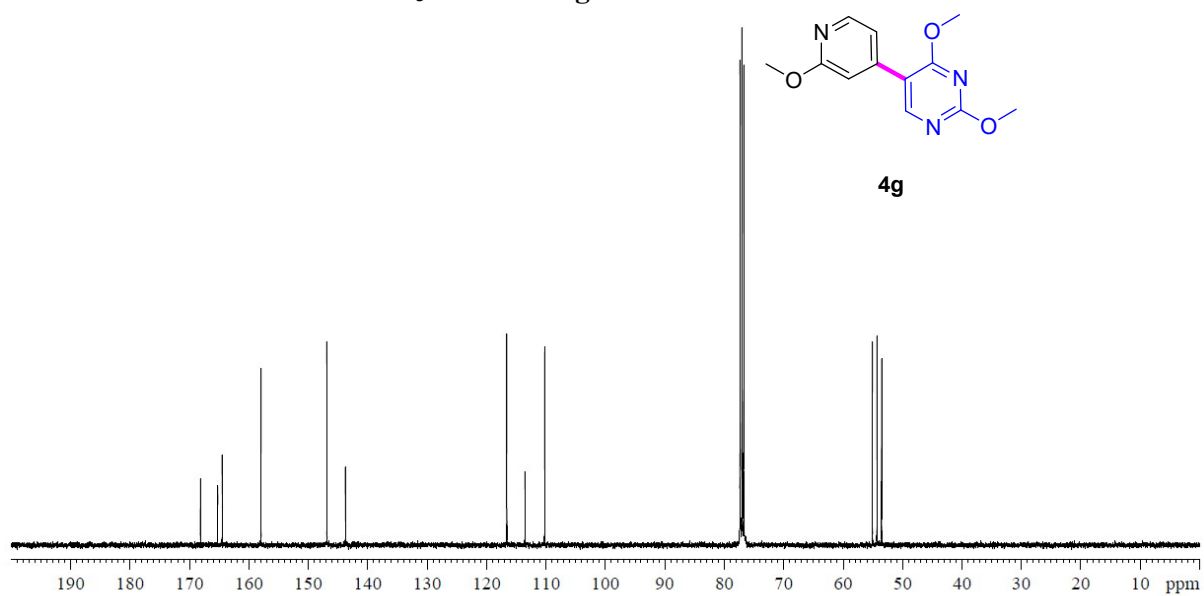

# <sup>1</sup>H and <sup>13</sup>C NMR of Compound 4h

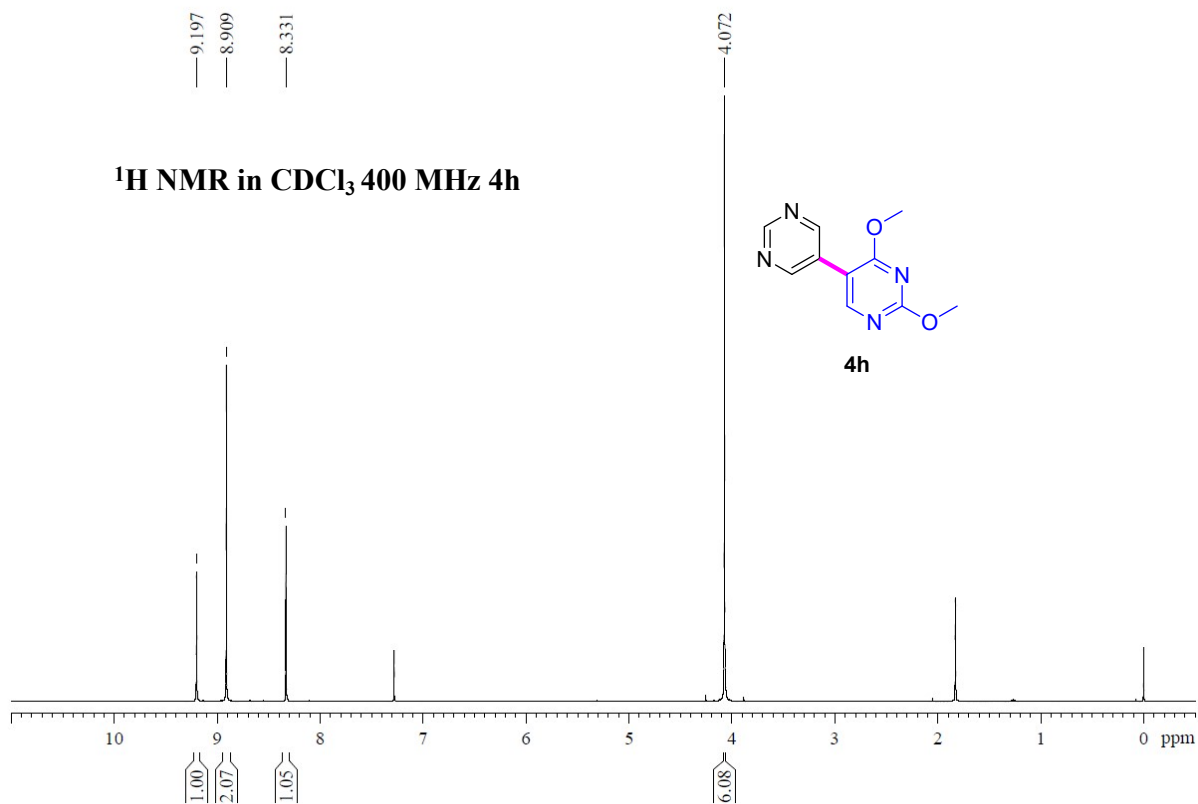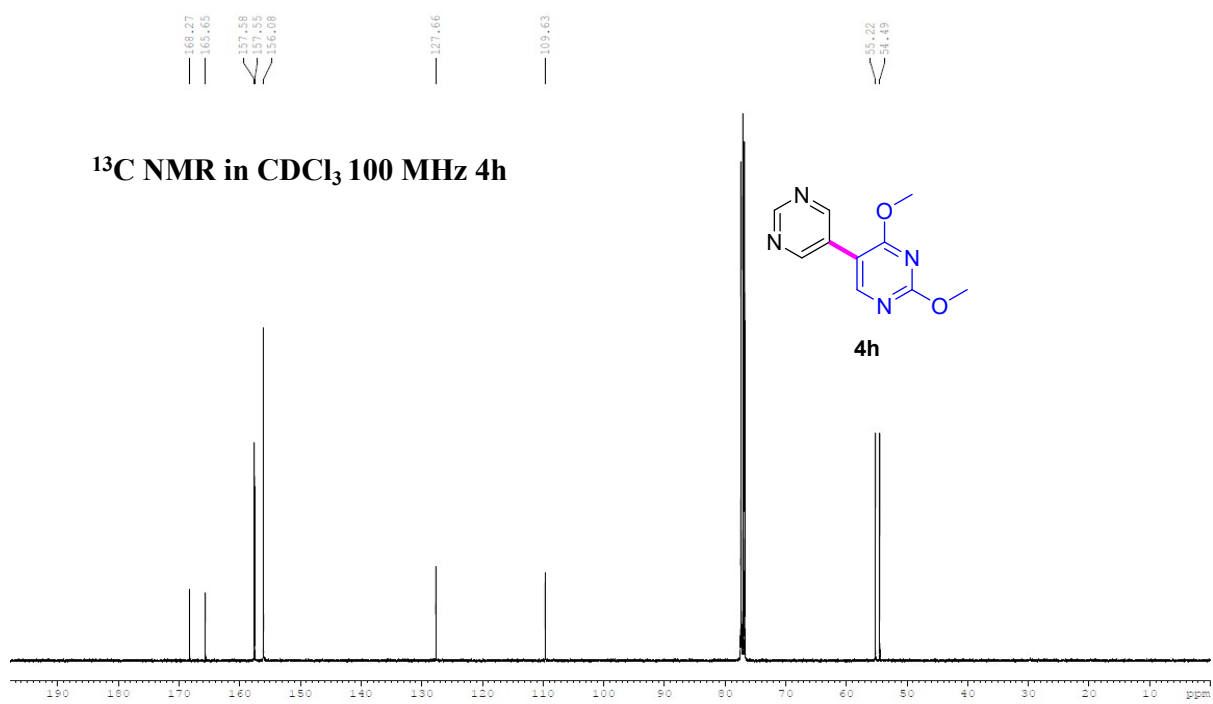



# <sup>1</sup>H and <sup>13</sup>C NMR of Compound 5a

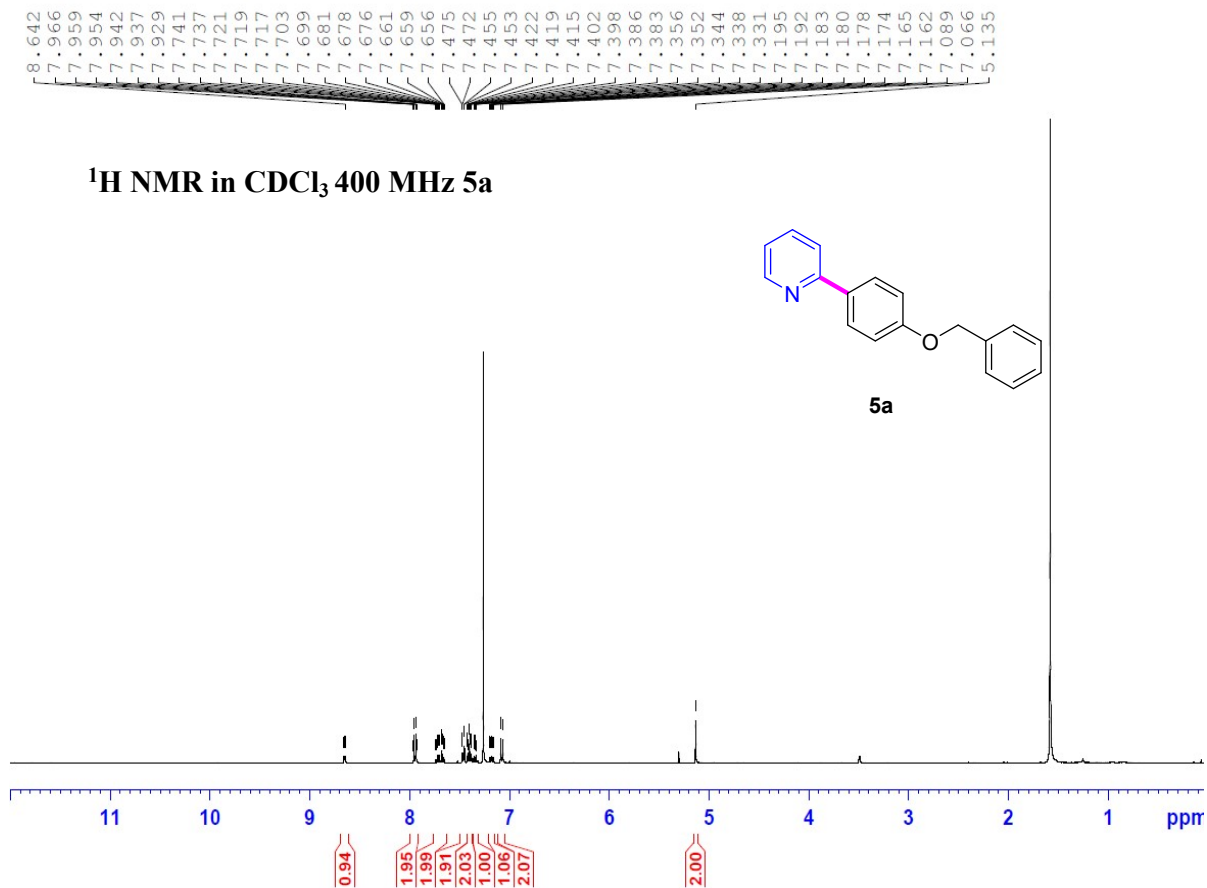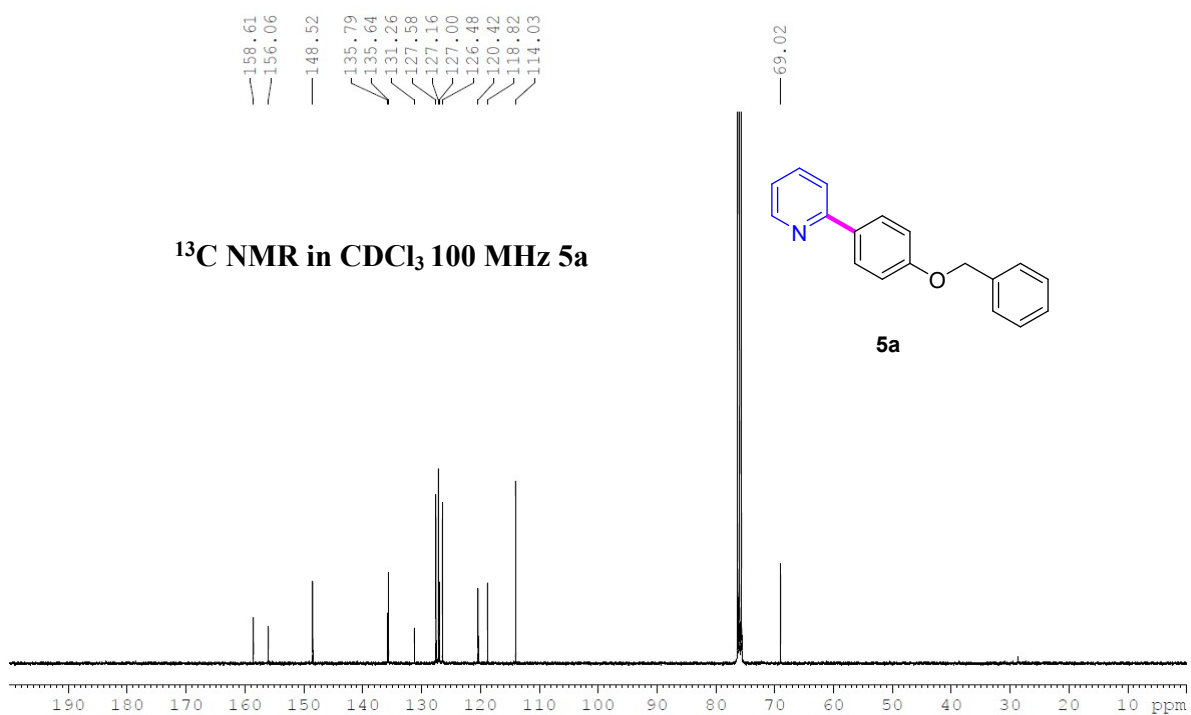

# $^1\text{H}$ and $^{13}\text{C}$ NMR of Compound 5b

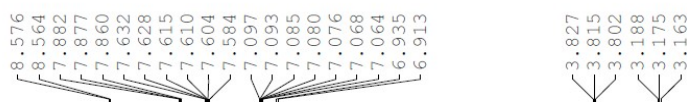

## $^1\text{H}$ NMR in $\text{CDCl}_3$ 400 MHz 5b

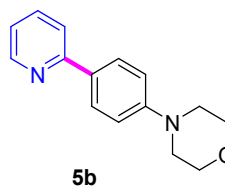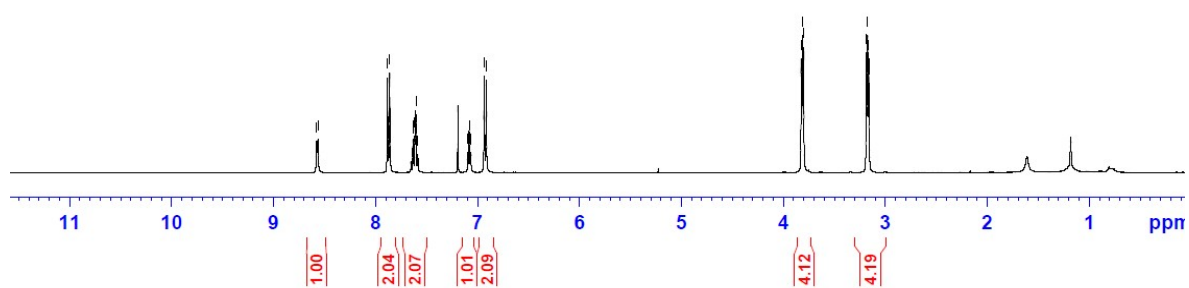

## $^{13}\text{C}$ NMR in $\text{CDCl}_3$ 100 MHz 5b

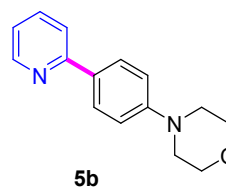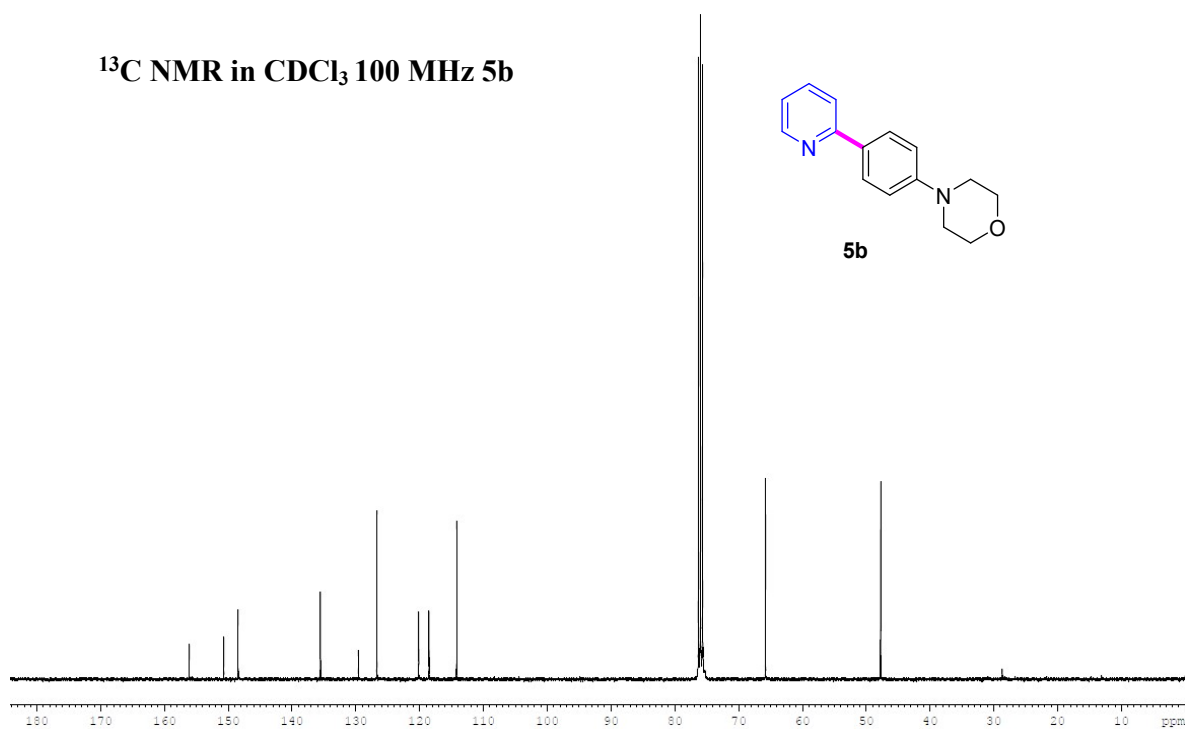

# <sup>1</sup>H and <sup>13</sup>C NMR of Compound 5c

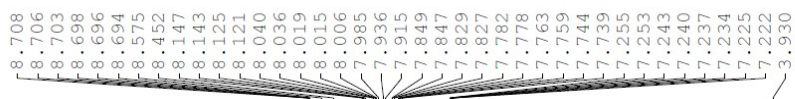

## <sup>1</sup>H NMR in CDCl<sub>3</sub> 400 MHz 5c

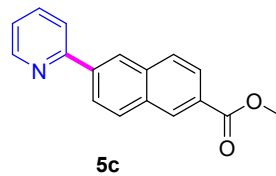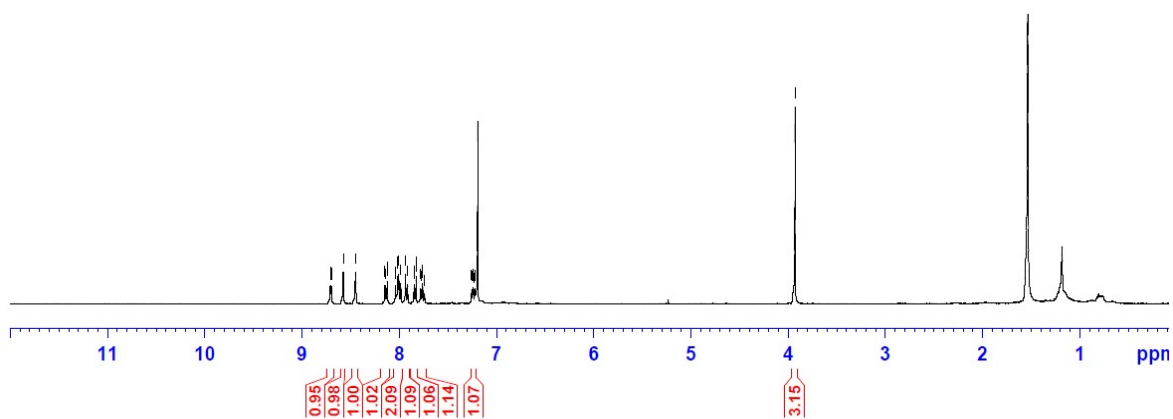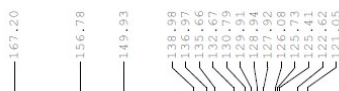

## <sup>13</sup>C NMR in CDCl<sub>3</sub> 100 MHz 5c

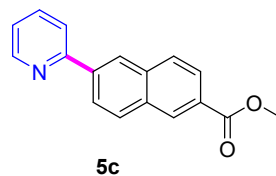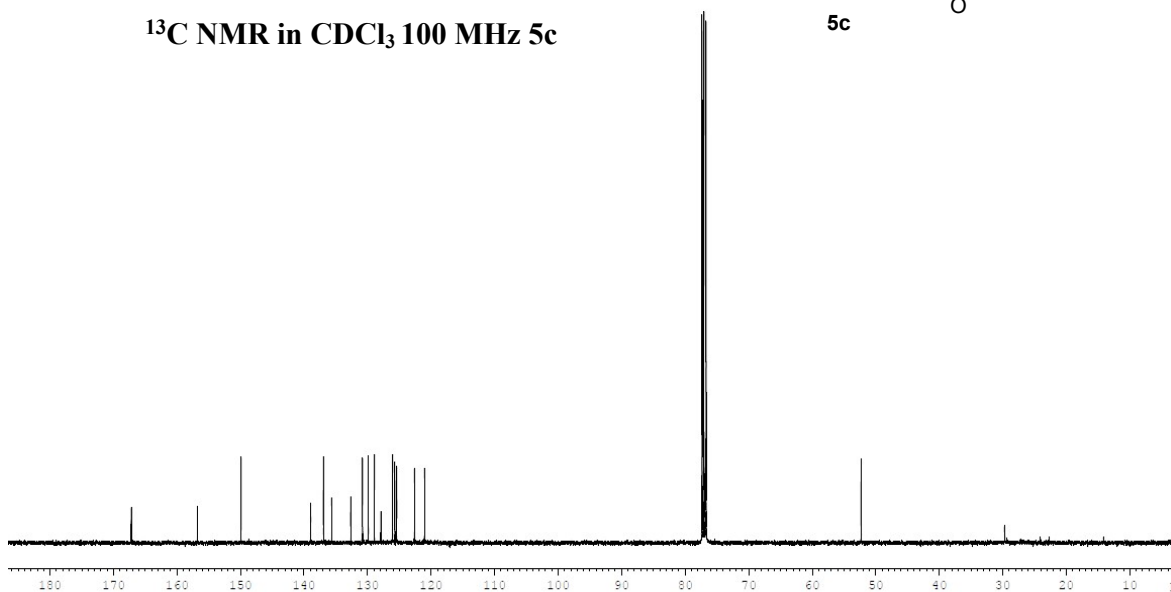

# $^1\text{H}$ and $^{13}\text{C}$ NMR of Compound 5d

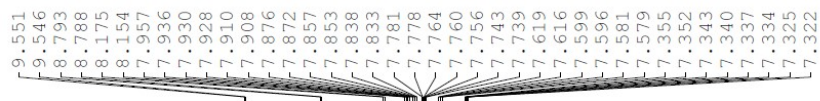

## $^1\text{H}$ NMR in $\text{CDCl}_3$ 400 MHz 5d

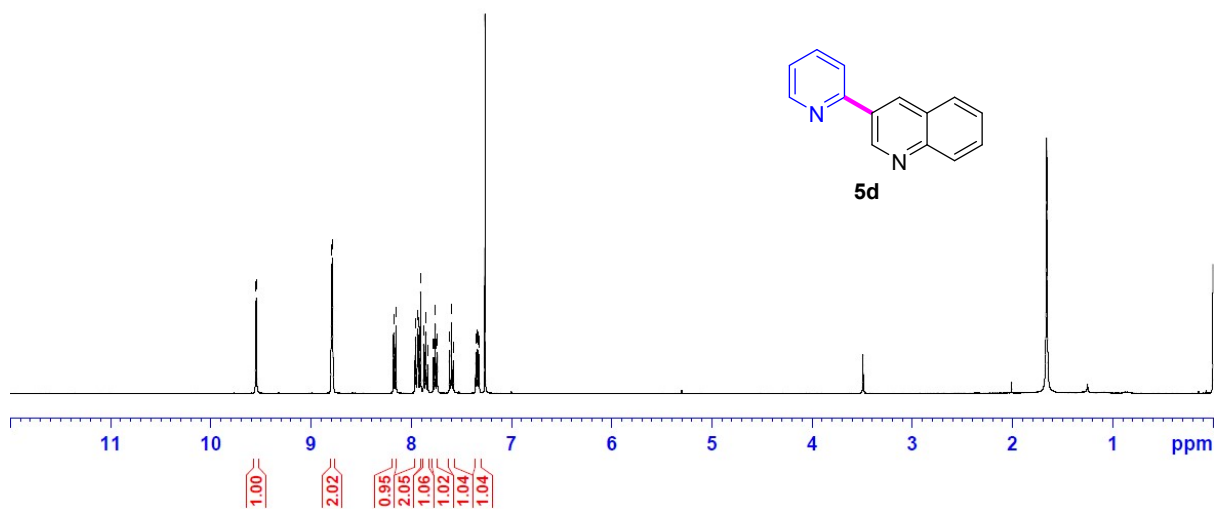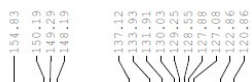

## $^{13}\text{C}$ NMR in $\text{CDCl}_3$ 100 MHz 5d

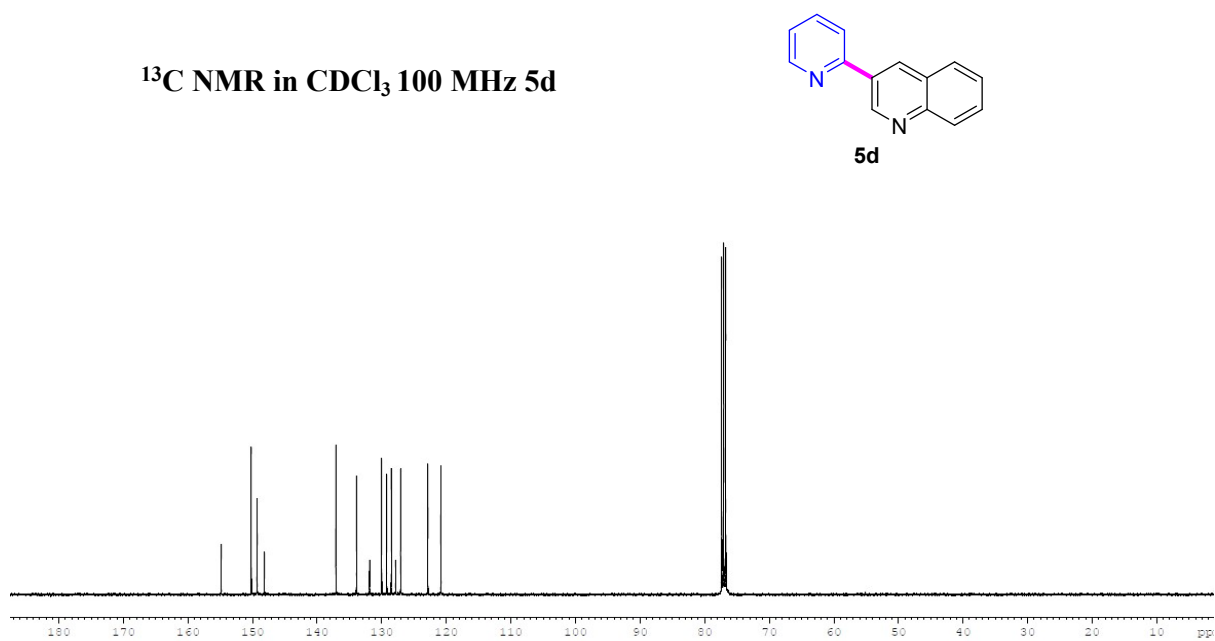

# $^1\text{H}$ and $^{13}\text{C}$ NMR of Compound 5e

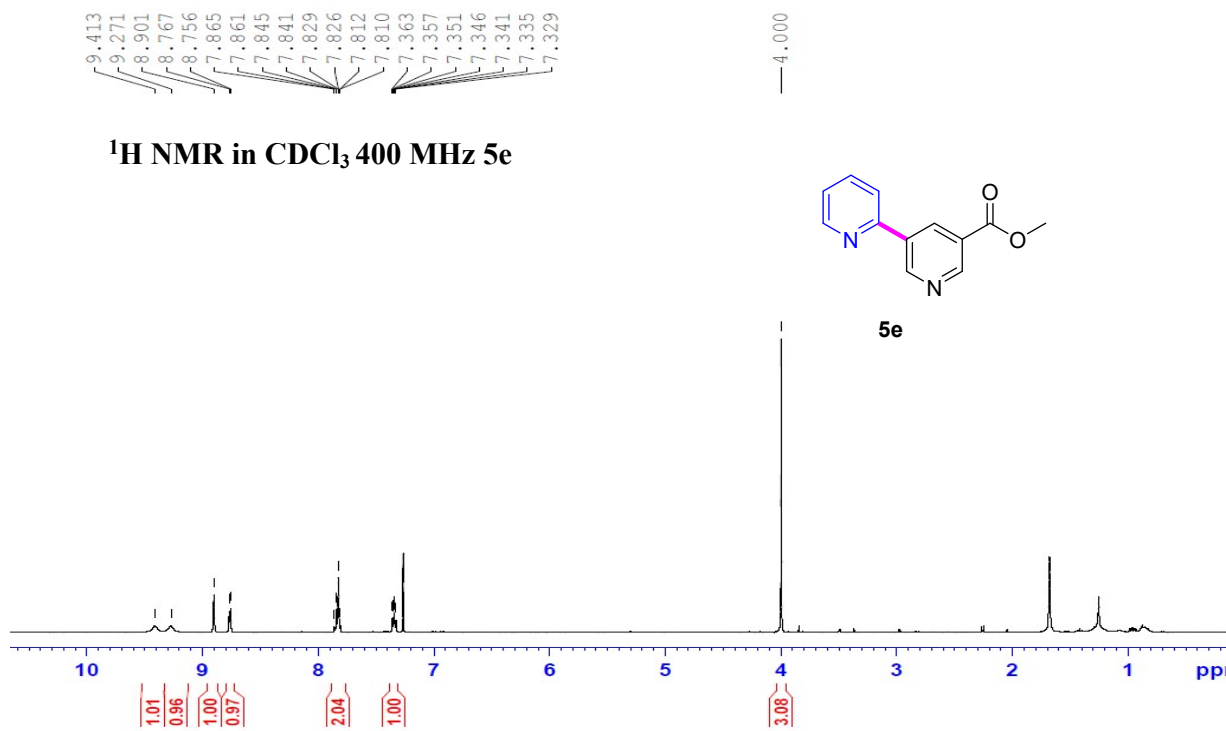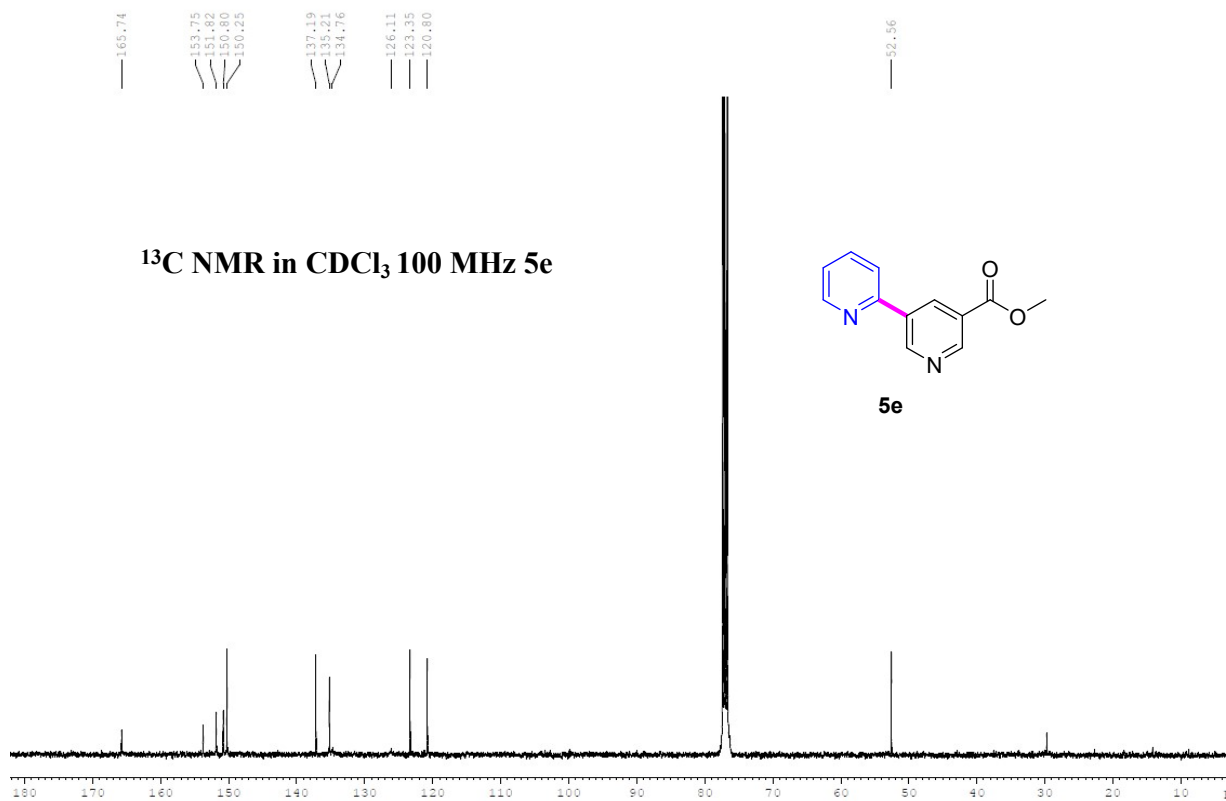

# $^1\text{H}$ and $^{13}\text{C}$ NMR of Compound 5f

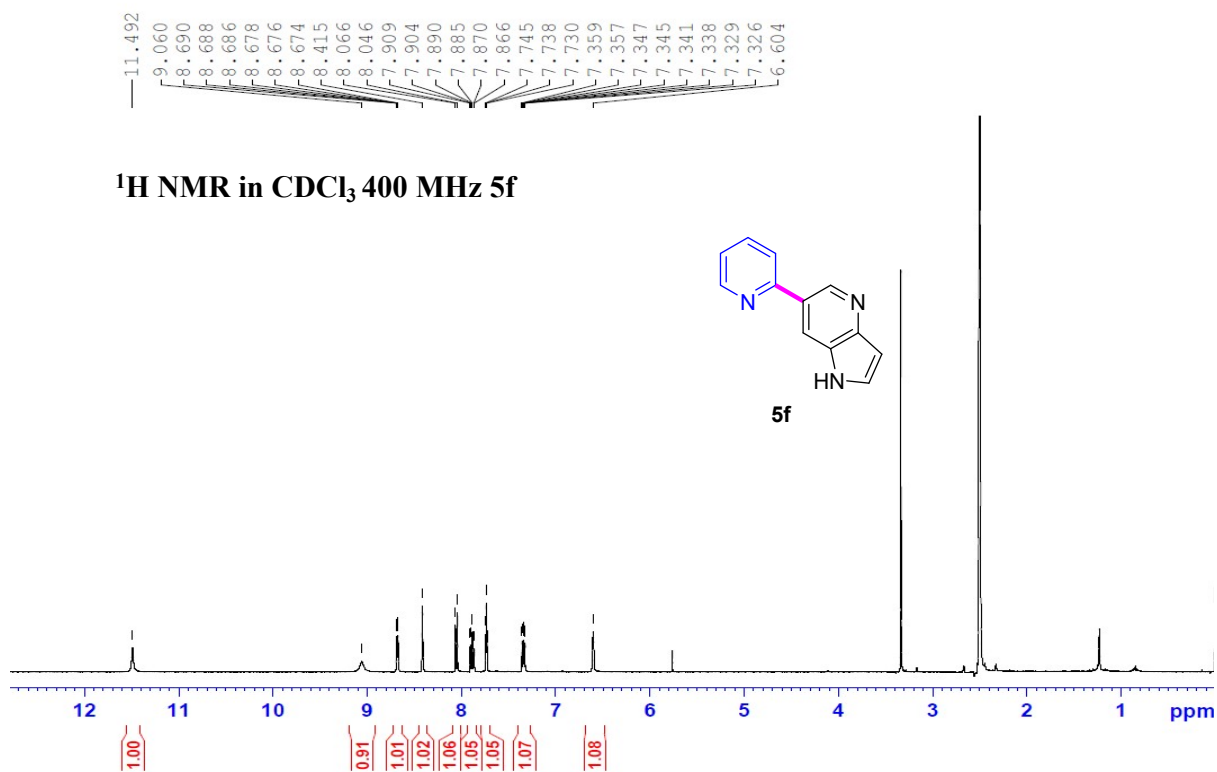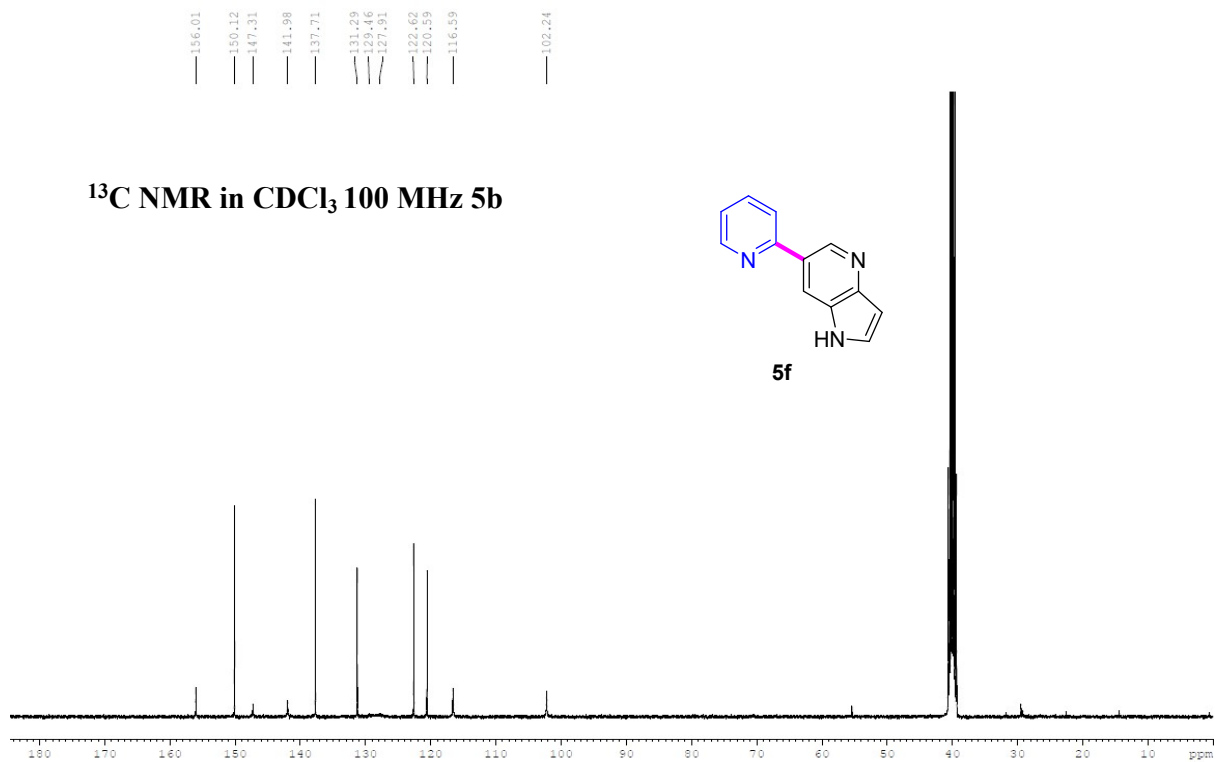

# <sup>1</sup>H and <sup>13</sup>C NMR of Compound 5g

8.734  
8.733  
8.730  
8.725  
8.723  
8.277  
8.264  
7.823  
7.818  
7.803  
7.800  
7.785  
7.780  
7.765  
7.763  
7.745  
7.743  
7.500  
7.496  
7.487  
7.483  
7.343  
7.331  
7.313  
7.310

3.995

## <sup>1</sup>H NMR in CDCl<sub>3</sub> 400 MHz 5g

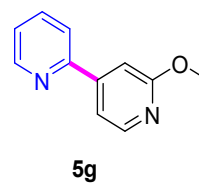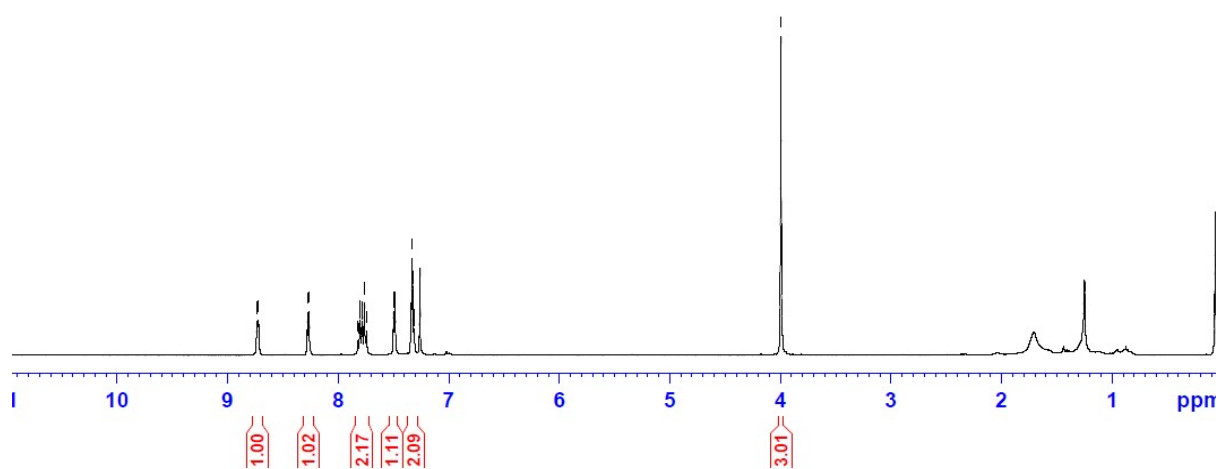

164.05  
153.74  
148.93  
148.32  
146.44  
135.99  
122.70  
119.97  
113.63  
107.26

52.64

## <sup>13</sup>C NMR in CDCl<sub>3</sub> 100 MHz 5g

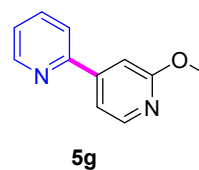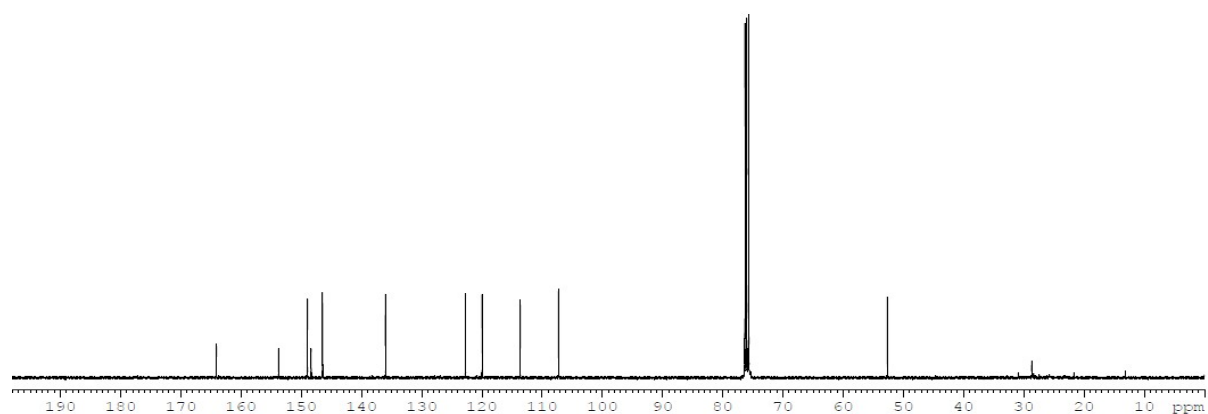

# $^1\text{H}$ and $^{13}\text{C}$ NMR of Compound 5h

9.644  
9.641  
8.738  
8.737  
8.727  
8.633  
8.627  
8.623  
8.610  
8.604  
8.377  
8.357  
7.882  
7.877  
7.862  
7.858  
7.843  
7.838  
7.395  
7.392  
7.383  
7.380  
7.376  
7.373  
7.364  
7.361

## $^1\text{H}$ NMR in $\text{CDCl}_3$ 400 MHz 5h

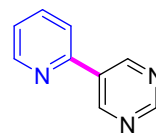

5h

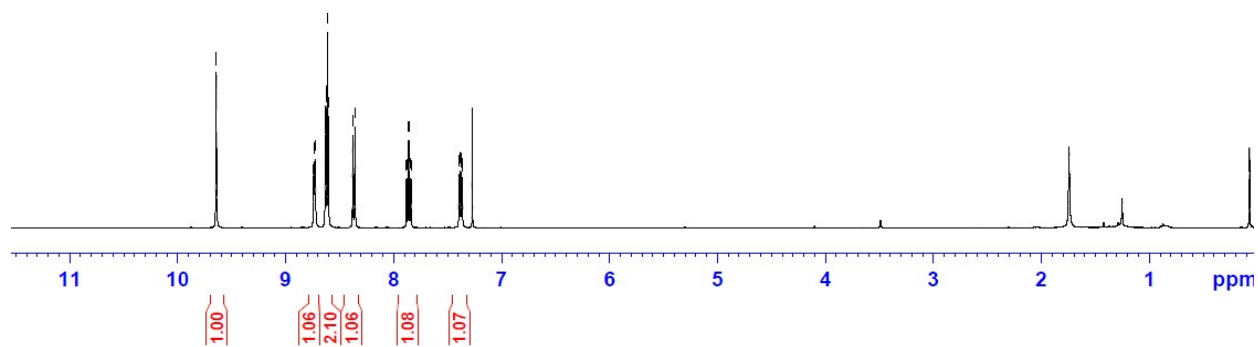

154.21  
151.15  
149.52  
144.49  
143.61  
143.38  
137.13  
124.47  
121.48

## $^{13}\text{C}$ NMR in $\text{CDCl}_3$ 100 MHz 5h

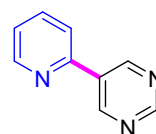

5h

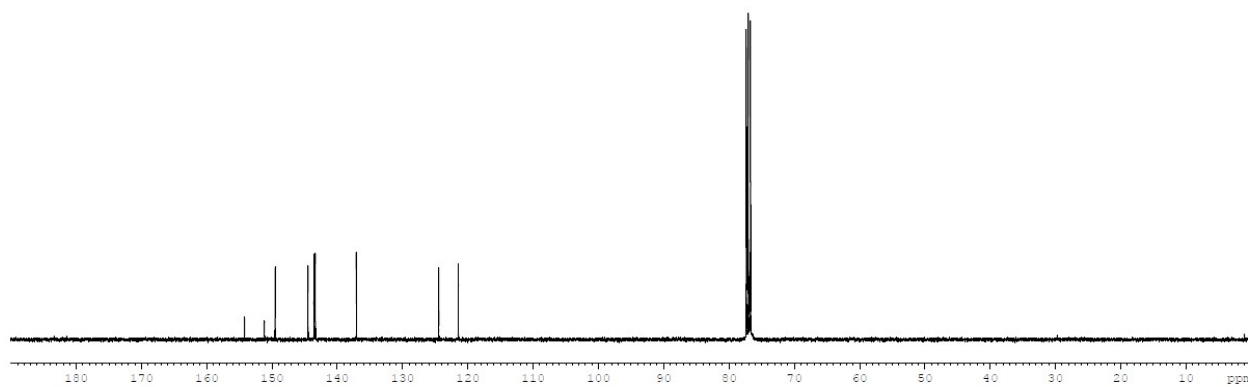



# $^1\text{H}$ and $^{13}\text{C}$ NMR of Compound **5i**

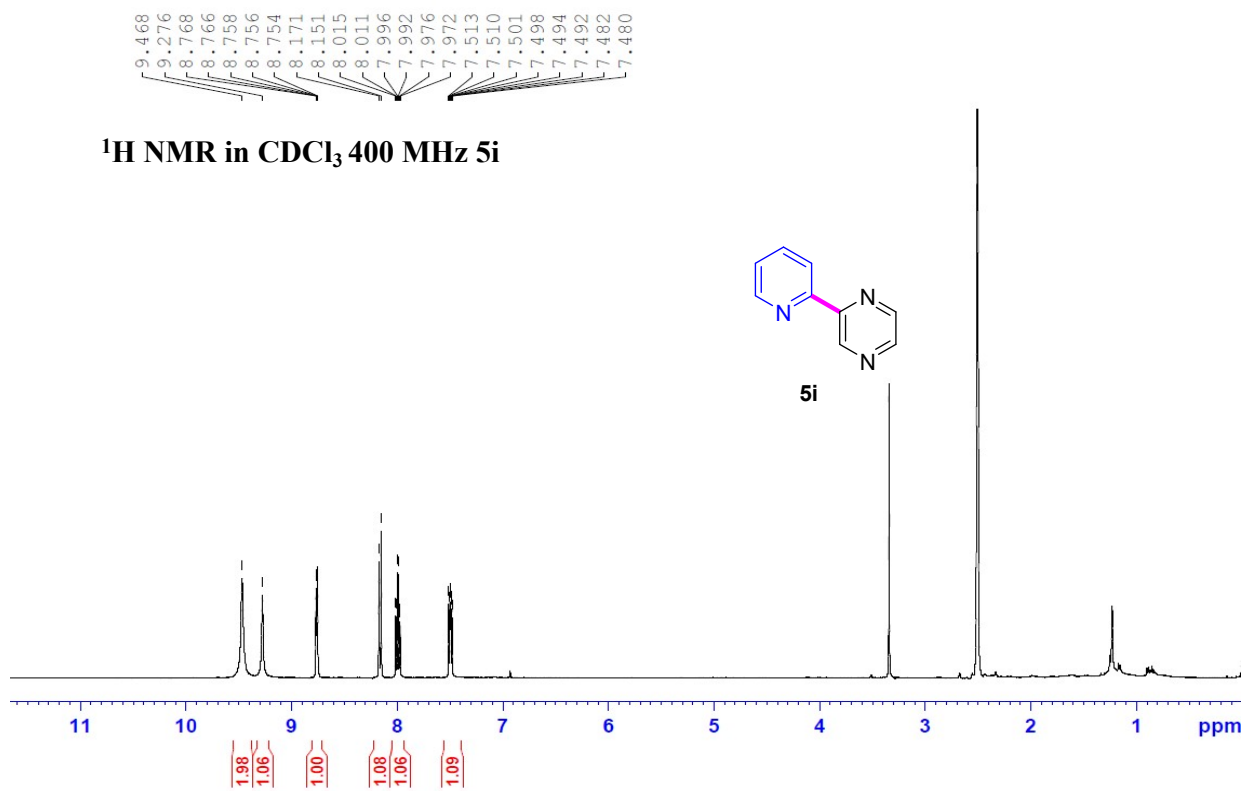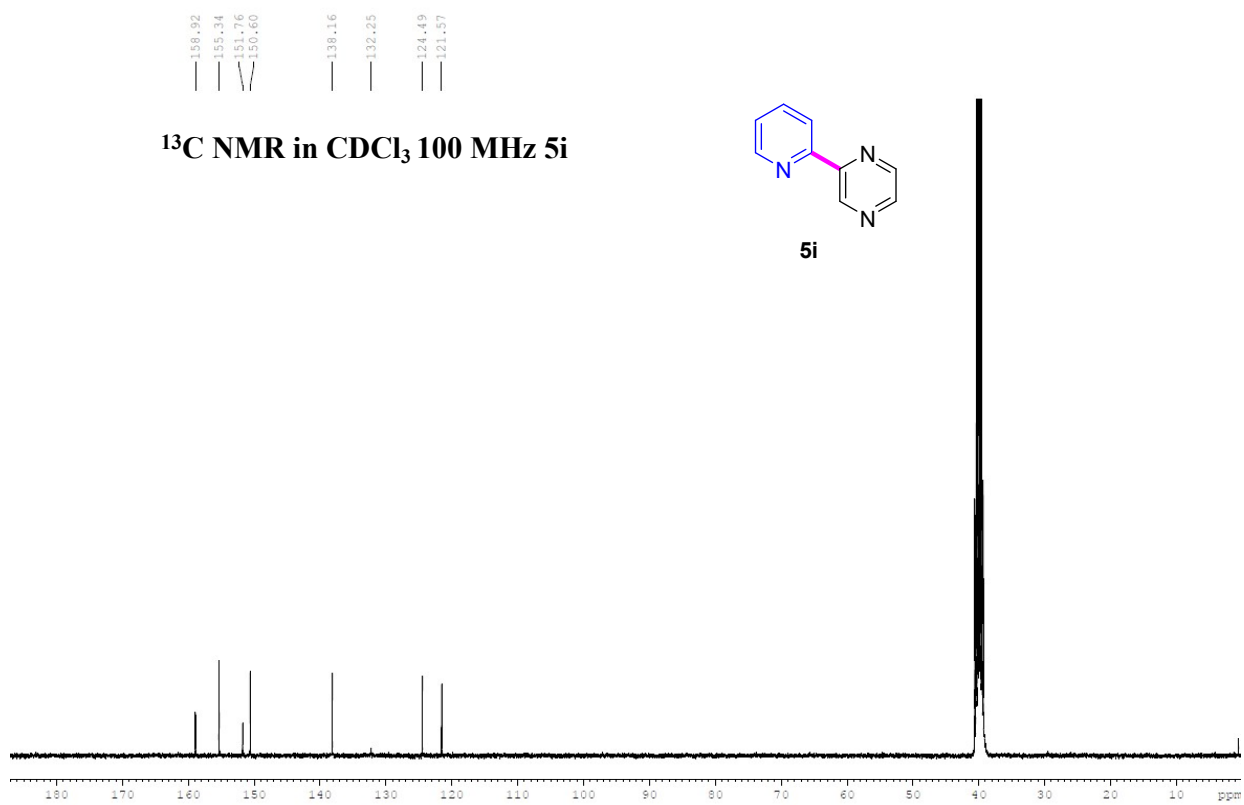

# $^1\text{H}$ and $^{13}\text{C}$ NMR of Compound 5j

9.494  
9.489  
8.835  
8.830  
8.169  
8.148  
7.965  
7.945  
7.849  
7.833  
7.830  
7.823  
7.805  
7.793  
7.789  
7.786  
7.776  
7.772  
7.755  
7.626  
7.624  
7.606  
7.374  
7.371  
7.356  
7.353

## $^1\text{H}$ NMR in $\text{CDCl}_3$ 400 MHz 5j

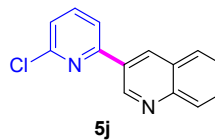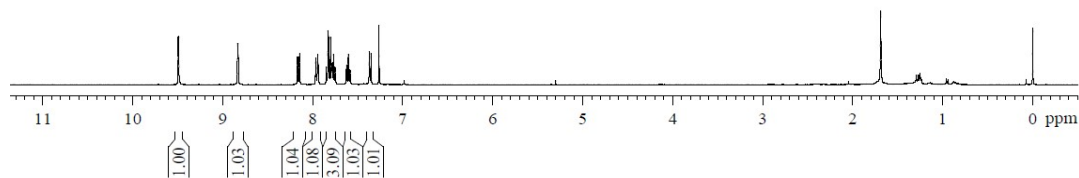

155.49  
151.95  
148.82  
148.45  
139.66  
134.46  
130.41  
130.34  
129.31  
128.69  
127.73  
127.26  
123.42  
119.00

## $^{13}\text{C}$ NMR in $\text{CDCl}_3$ 100 MHz 5j

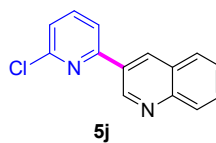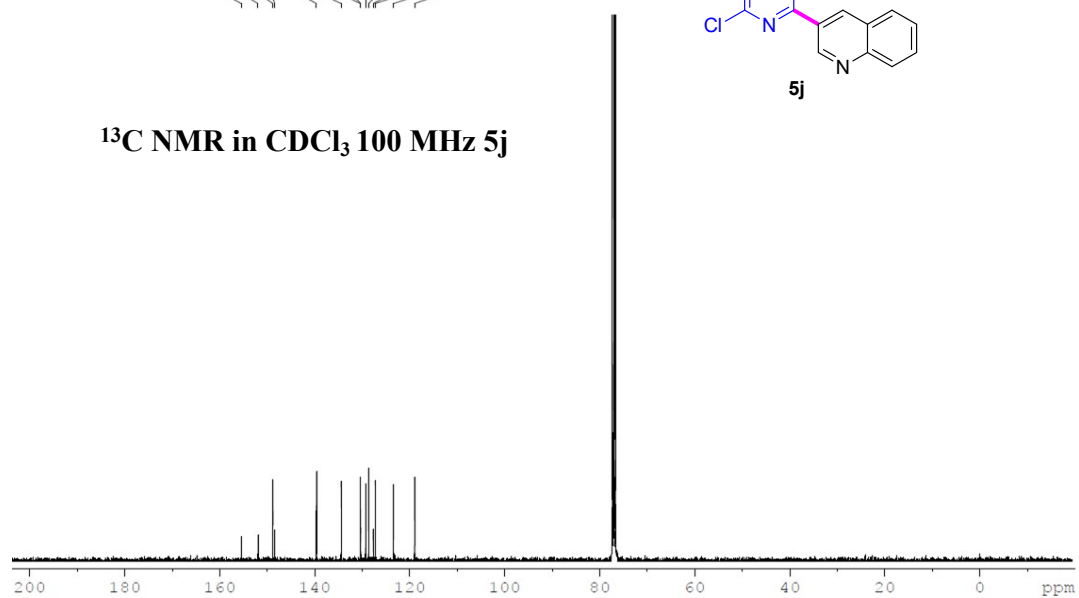

# $^1\text{H}$ and $^{13}\text{C}$ NMR of Compound 5k

8.682  
8.678  
8.670  
8.666  
8.365  
8.360  
8.355  
8.345  
8.340  
8.335  
7.788  
7.769  
7.750  
7.705  
7.704  
7.686  
7.438  
7.426  
7.418  
7.406  
7.349  
7.329

$^1\text{H}$  NMR in  $\text{CDCl}_3$  400 MHz 5k

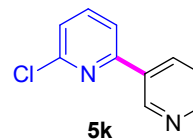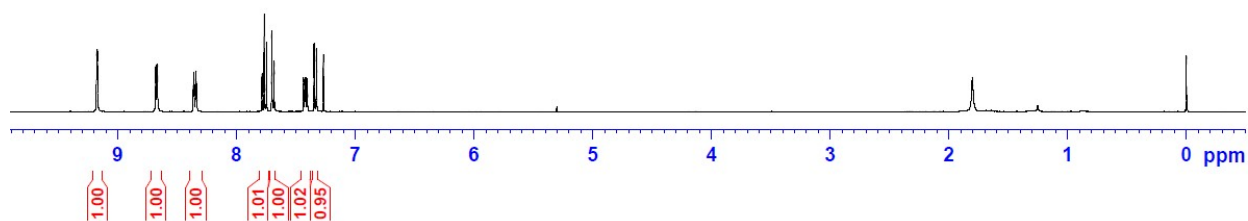

$^{13}\text{C}$  NMR in  $\text{CDCl}_3$  100 MHz 5k

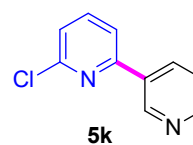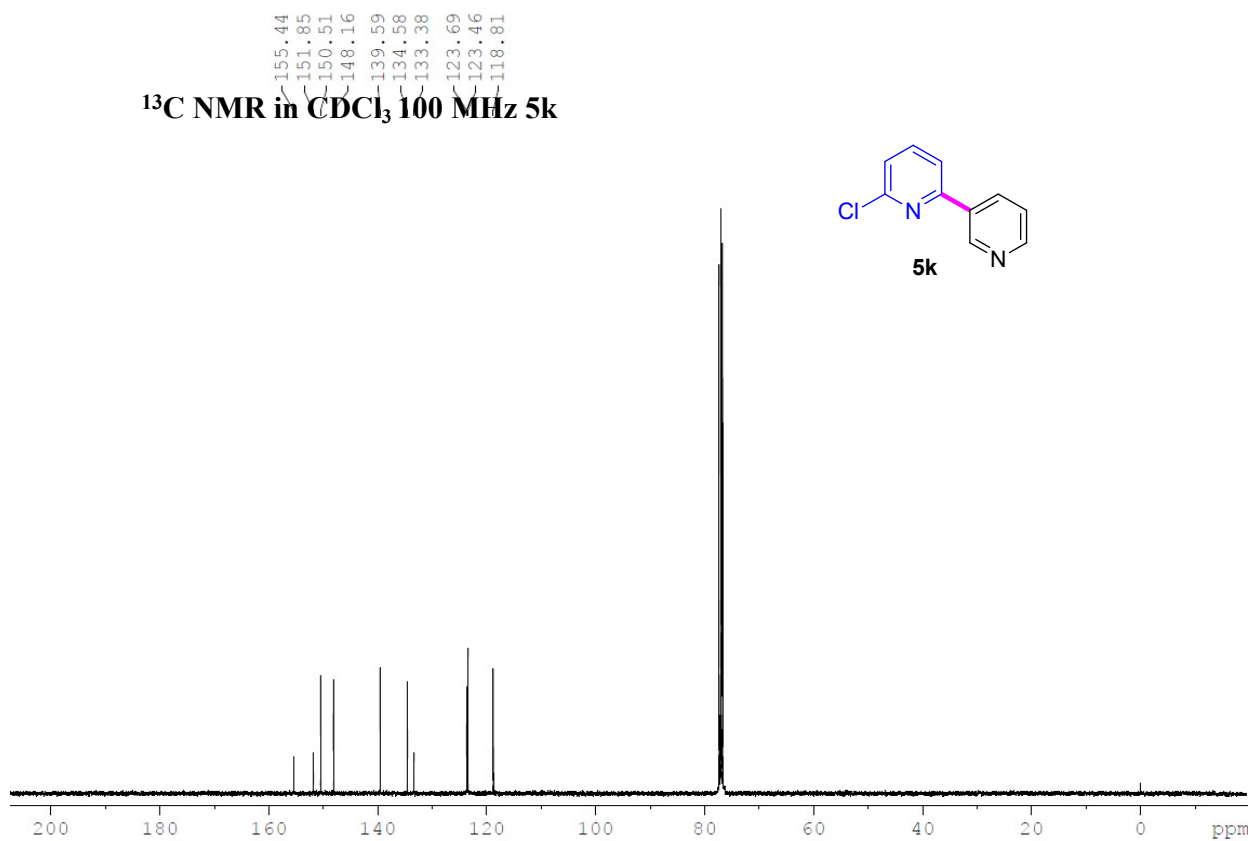

# $^1\text{H}$ and $^{13}\text{C}$ NMR of Compound 6a

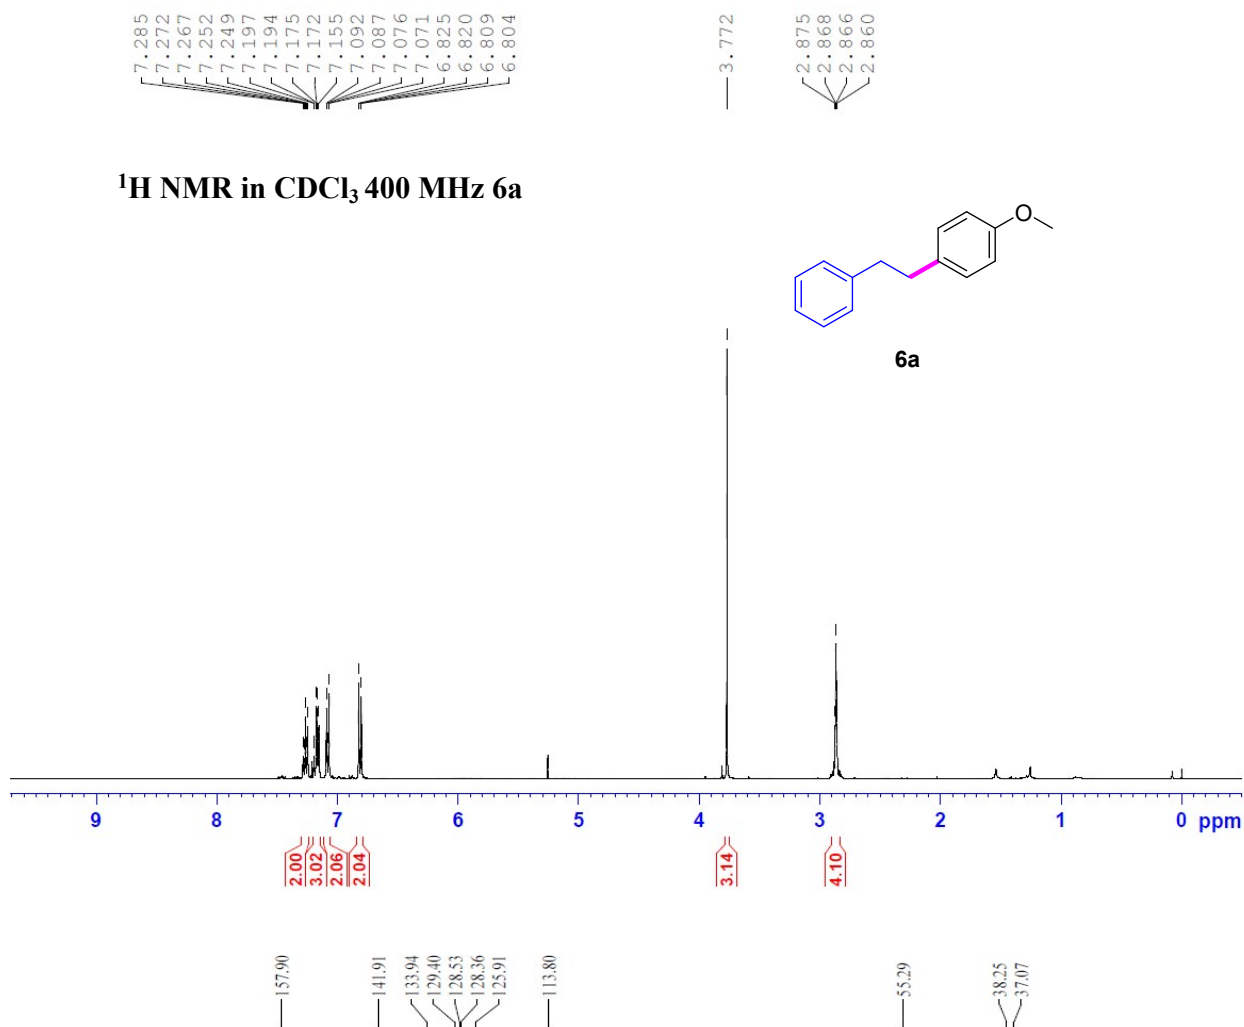

# $^{13}\text{C}$ NMR in $\text{CDCl}_3$ 100 MHz 6a

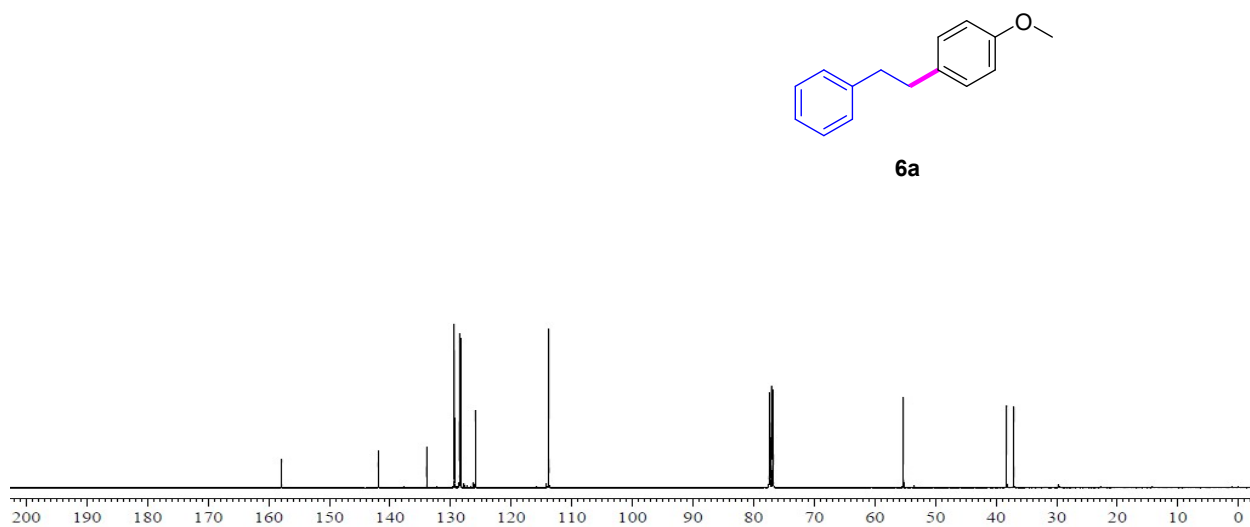

# <sup>1</sup>H and <sup>13</sup>C NMR of Compound 6b

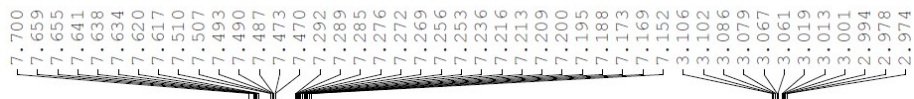

## <sup>1</sup>H NMR in CDCl<sub>3</sub> 400 MHz 6b

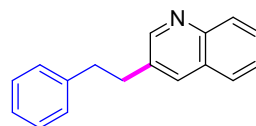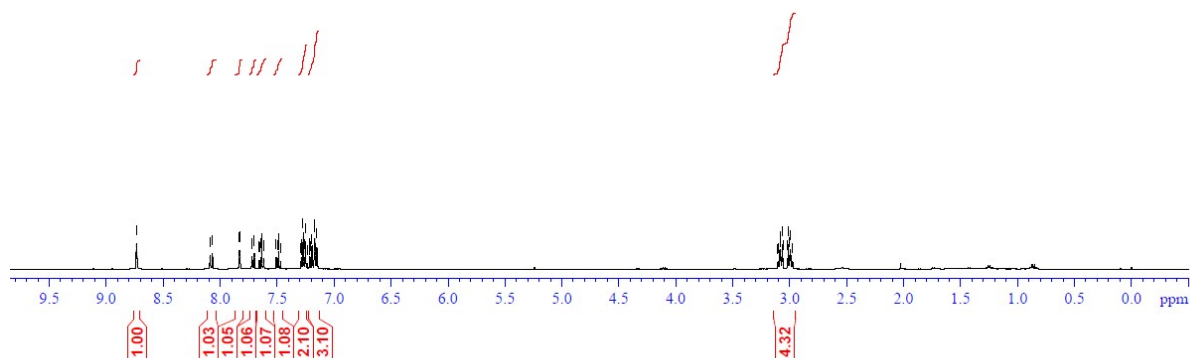

## <sup>13</sup>C NMR in CDCl<sub>3</sub> 100 MHz 6b

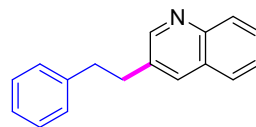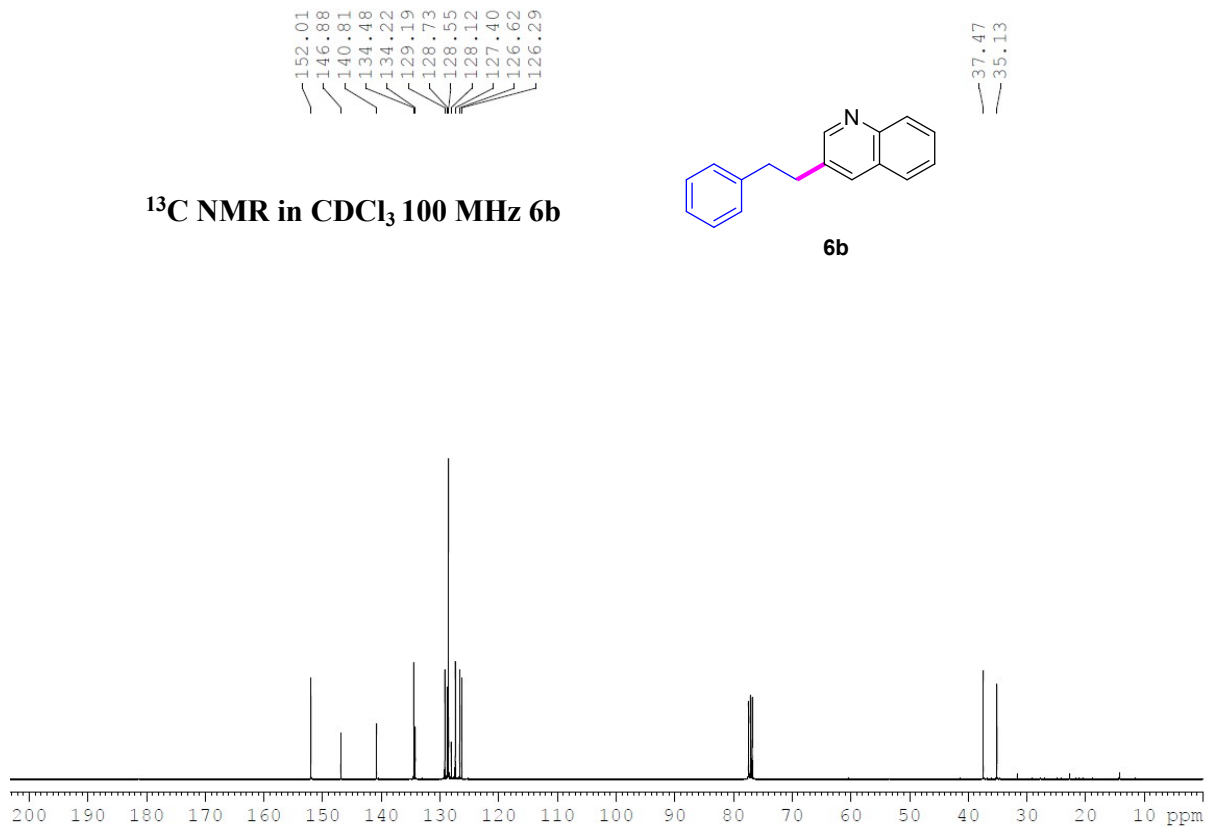

# $^1\text{H}$ , $^{13}\text{C}$ , and $^{19}\text{F}$ -NMR of Compound 6c

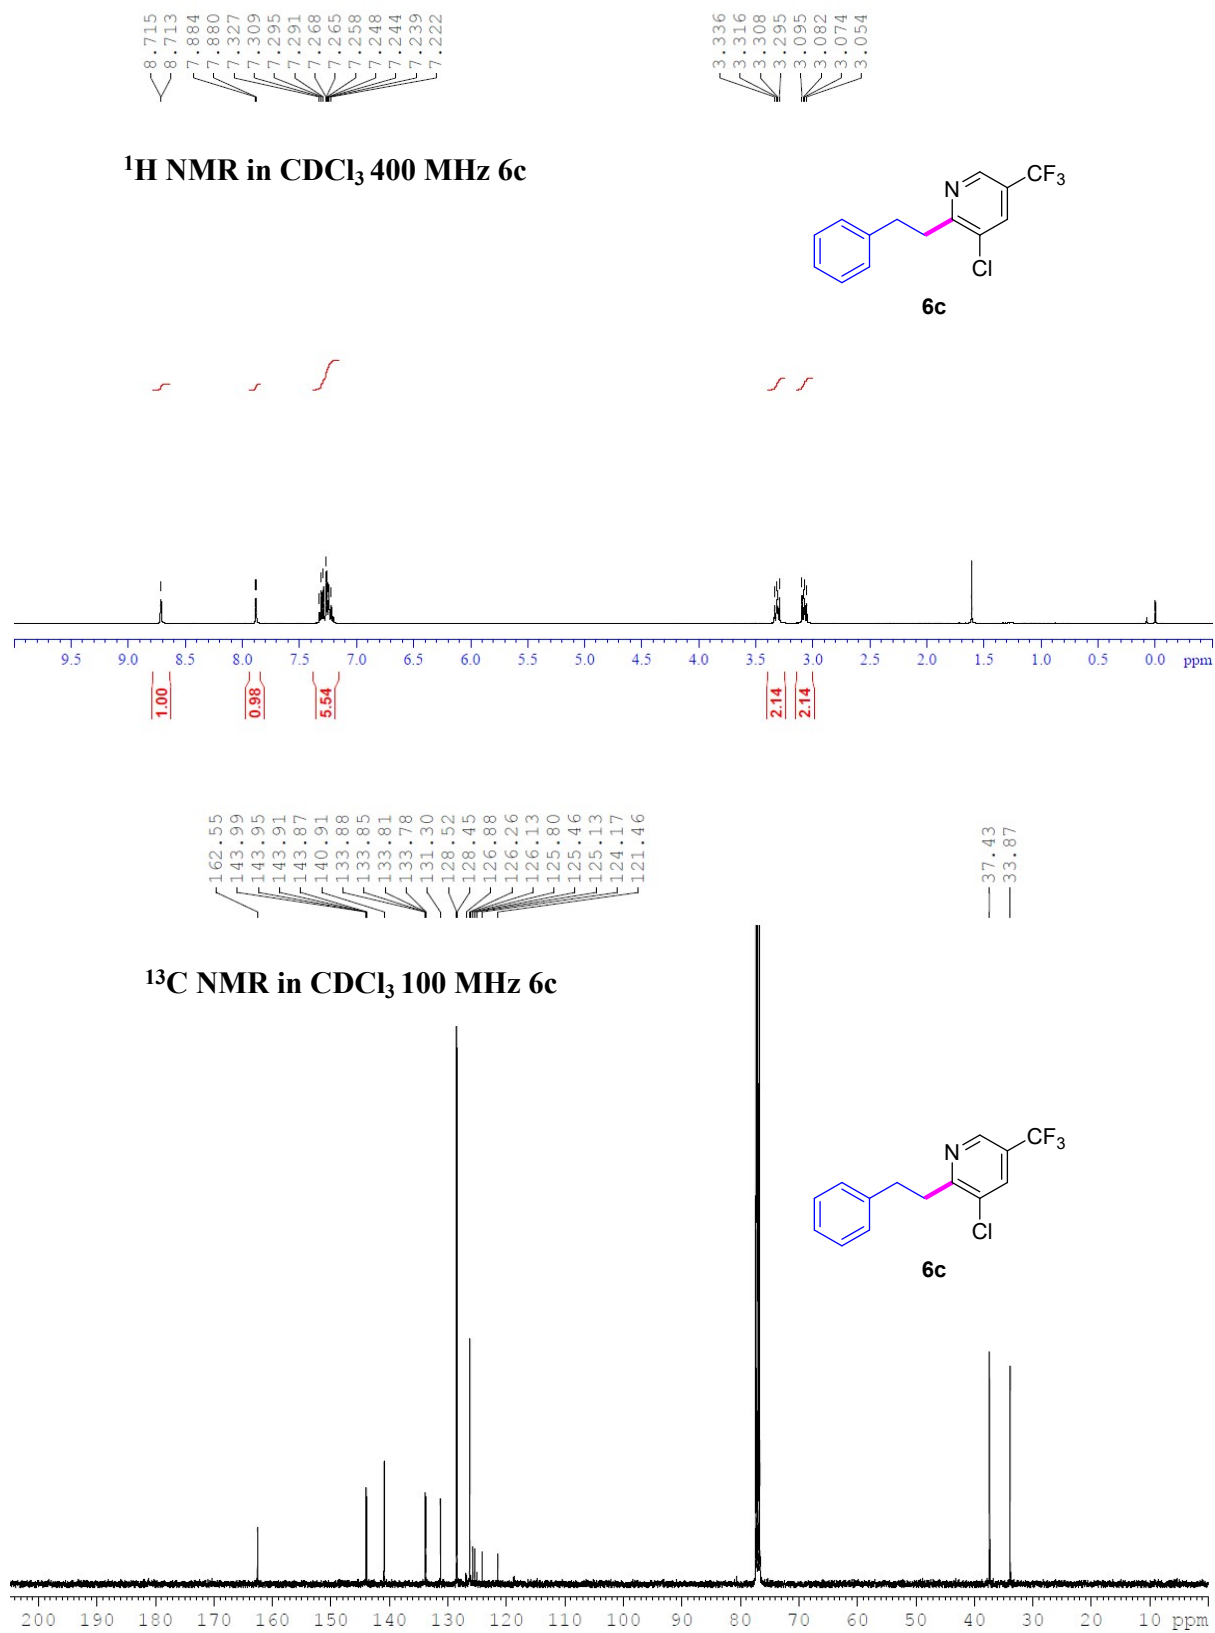

**<sup>19</sup>F NMR in CDCl<sub>3</sub> 376 MHz 6c**

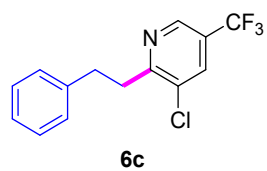

— 62.116

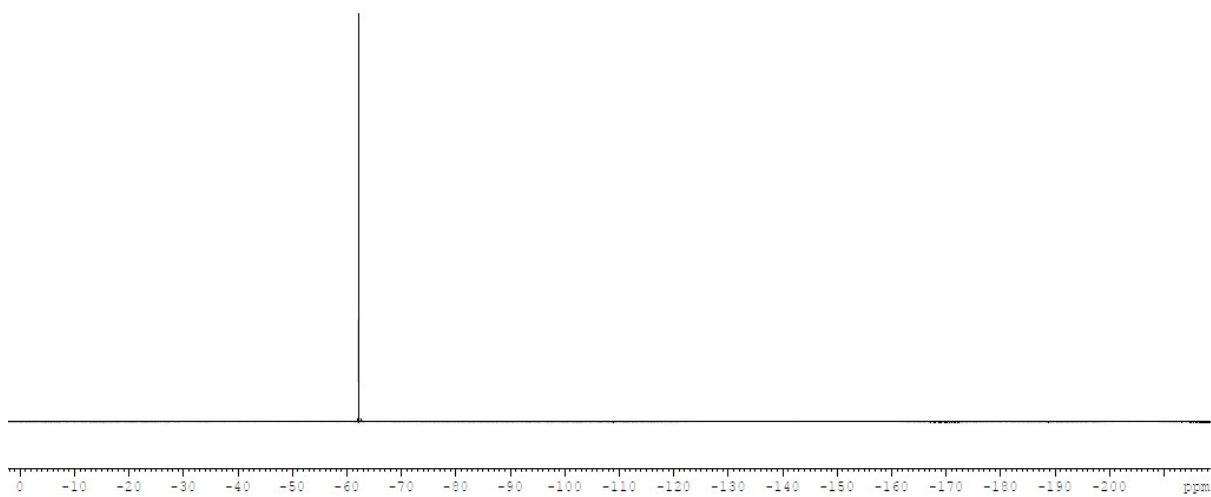

# $^1\text{H}$ and $^{13}\text{C}$ NMR of Compound 6d

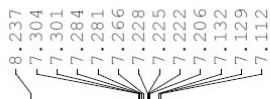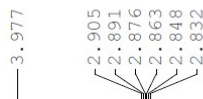

## $^1\text{H}$ NMR in $\text{CDCl}_3$ 400 MHz 6d

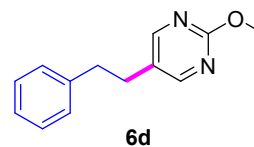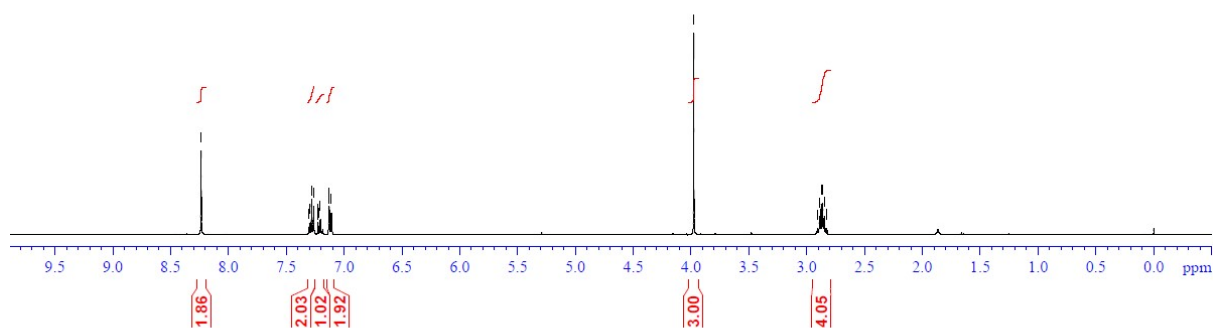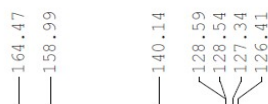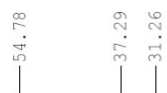

## $^{13}\text{C}$ NMR in $\text{CDCl}_3$ 100 MHz 6d

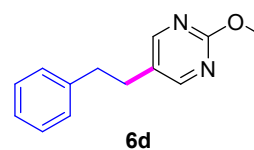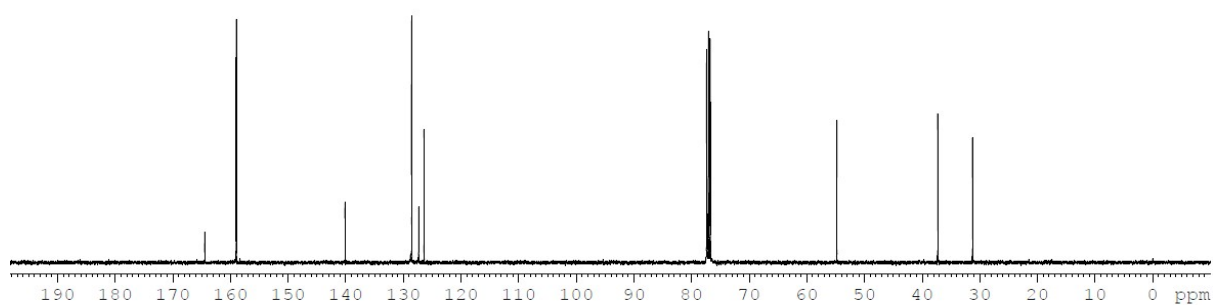



# $^1\text{H}$ and $^{13}\text{C}$ NMR of Compound 6e

7.104  
7.083  
6.859  
6.838

3.871  
3.859  
3.847  
3.133  
3.120  
3.109  
2.544  
2.526  
2.506  
1.599  
1.587  
1.570  
1.553  
1.550  
1.290  
1.274  
1.257  
1.213  
0.891  
0.880  
0.875  
0.857

## $^1\text{H}$ NMR in $\text{CDCl}_3$ 400 MHz 6e

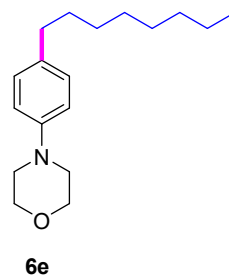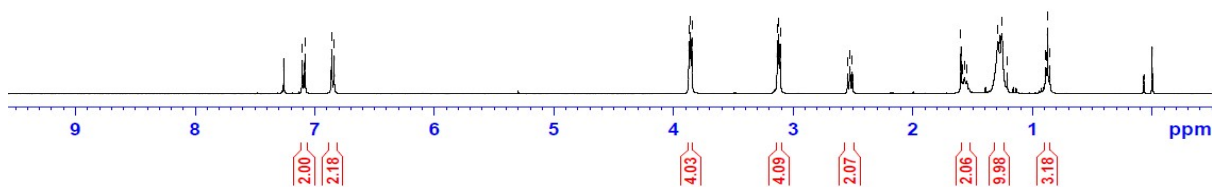

## $^{13}\text{C}$ NMR in $\text{CDCl}_3$ 100 MHz 6e

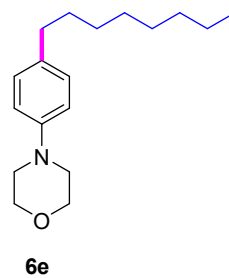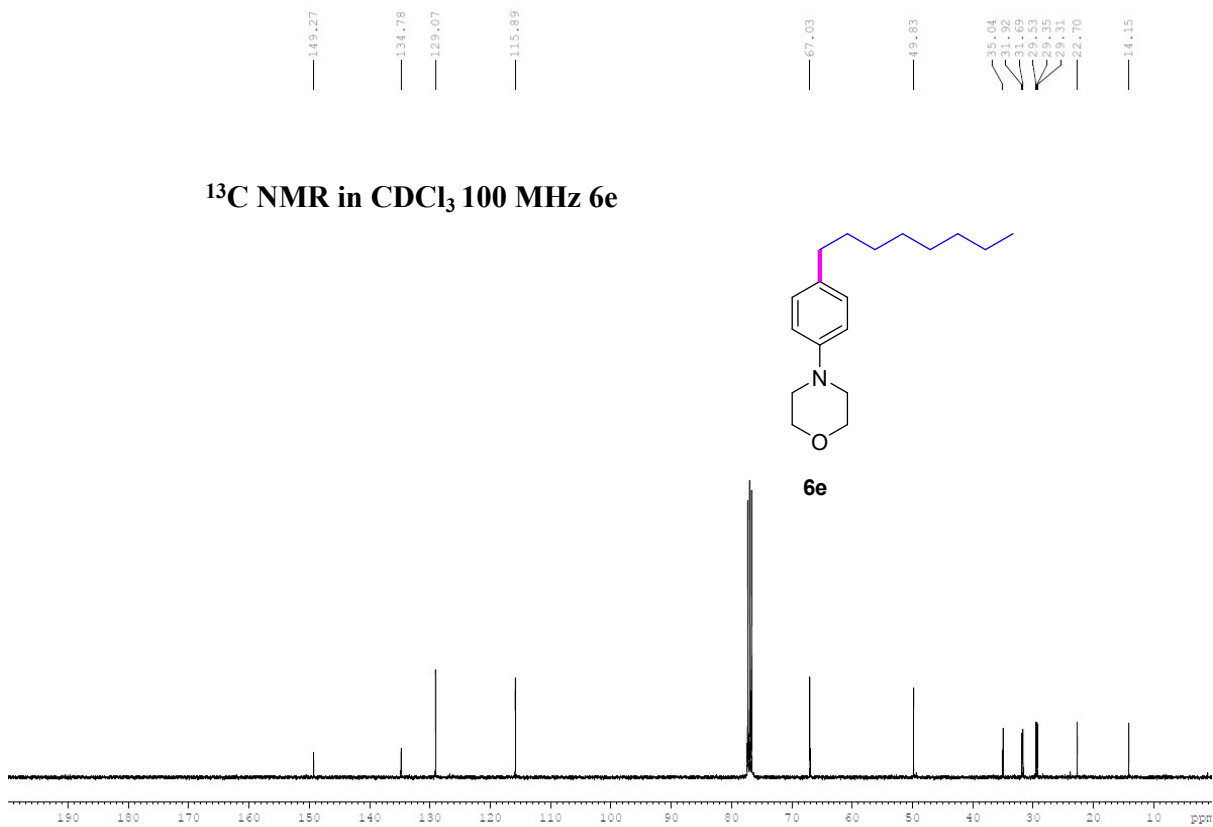

# $^1\text{H}$ and $^{13}\text{C}$ NMR of Compound 6f

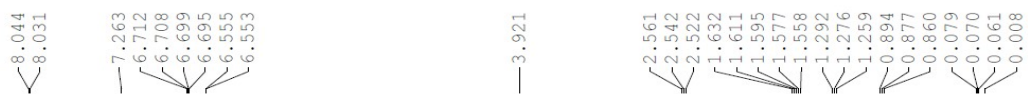

## $^1\text{H}$ NMR in $\text{CDCl}_3$ 400 MHz 6f

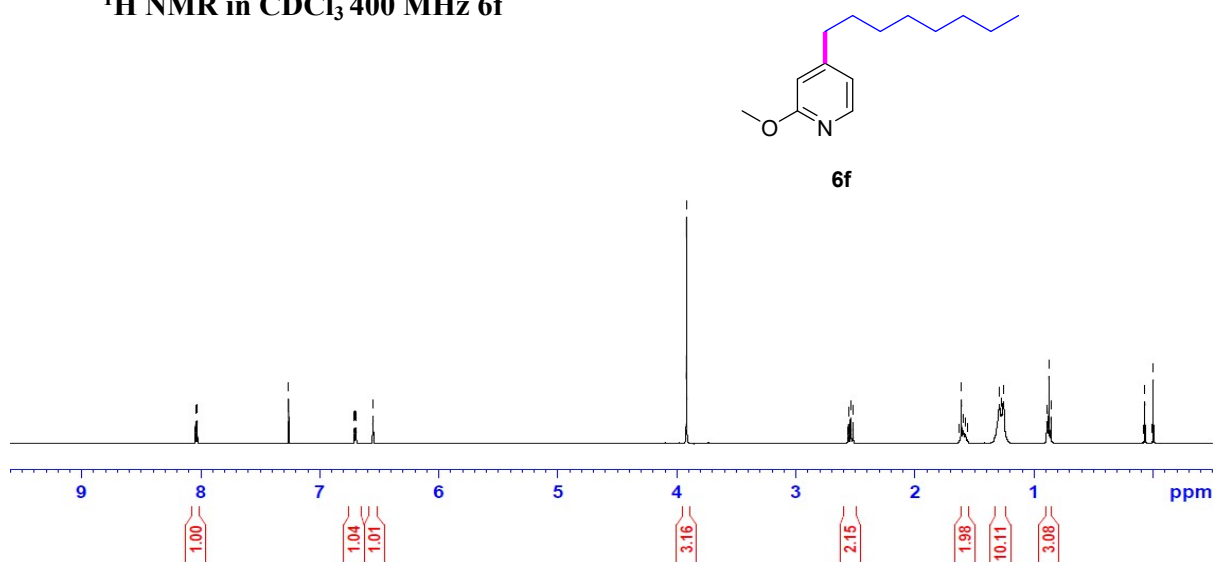

## $^{13}\text{C}$ NMR in $\text{CDCl}_3$ 100 MHz 6f

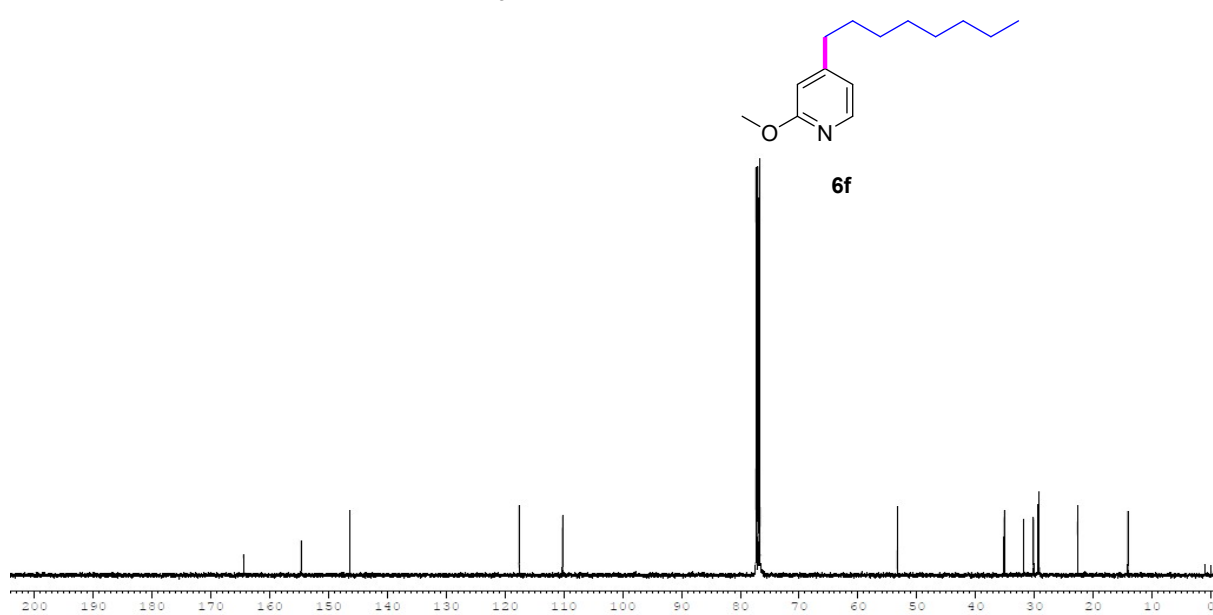

# <sup>1</sup>H and <sup>13</sup>C NMR of Compound 6g

8.304

3.998

2.411  
2.393  
1.851  
1.834  
1.818  
1.801  
1.784  
0.928  
0.911

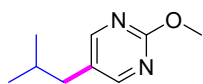

**6g**

## <sup>1</sup>H NMR in CDCl<sub>3</sub> 400 MHz 6g

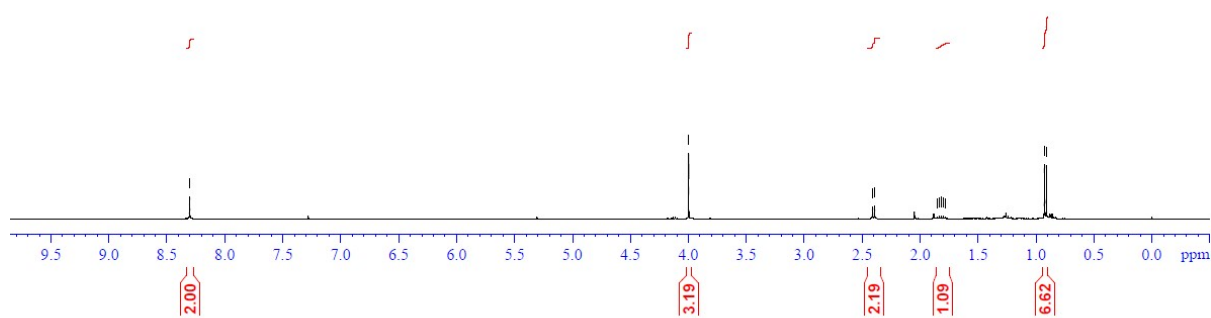

164.42  
159.32

127.19

54.72

38.54

29.87

21.96

## <sup>13</sup>C NMR in CDCl<sub>3</sub> 100 MHz 4g

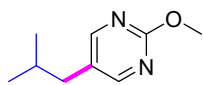

**6g**

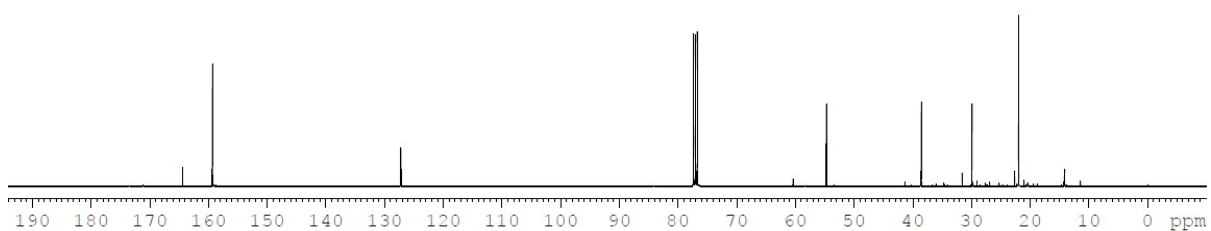

## 10. IPC-MS spectra for Pd-content:

### IPC-MS spectra of compound-3m



# TEST REPORT

FirstSource Laboratory Solutions LLP.  
(Analytical Services)

|                                                                                        |                                 |                                             |  |
|----------------------------------------------------------------------------------------|---------------------------------|---------------------------------------------|--|
| REPORT NO: FSL(AS)-5231523001                                                          |                                 | DATE OF ISSUANCE OF REPORT: 27/12/2023      |  |
| JOB REGISTRATION NO: FSL(AS)-5231523                                                   |                                 | SAMPLE ID: FSL(AS)-5231523001               |  |
| <b>CUSTOMER DETAILS:</b>                                                               |                                 | <b>SAMPLE DETAILS:</b>                      |  |
| ISSUED TO:<br>M/s Curia India Pvt.Ltd                                                  |                                 | NAME OF SAMPLE : IN-BDS-G-32                |  |
| ADDRESS:<br>Thurkapally, Shameerpet<br>Genome valley,RR District<br>Hyderabad- 500078. |                                 | BRAND/ GRADE/ VARIETY : NA                  |  |
|                                                                                        |                                 | BATCH NO/ LOT NO/ CODE : IN-BDS-G-32        |  |
|                                                                                        |                                 | DATE OF MANUFACTURING : NA                  |  |
|                                                                                        |                                 | DATE OF EXPIRY : NA                         |  |
|                                                                                        |                                 | QUANTITY OF SAMPLE RECEIVED : ~1.0 g x 1 No |  |
|                                                                                        |                                 | MODE OF PACKING : Packed in sealed vial     |  |
|                                                                                        |                                 | SEAL DETAILS : Intact                       |  |
|                                                                                        |                                 | ANY OTHER INFORMATION : NA                  |  |
| SAMPLE NOT DRAWN BY FSL(AS)                                                            |                                 |                                             |  |
| <b>TEST DETAILS AND RESULTS:</b>                                                       |                                 |                                             |  |
| SAMPLE REGISTRATION DATE: 22/12/2023                                                   | ANALYSIS START DATE: 26/12/2023 | ANALYSIS COMPLETED DATE: 26/12/2023         |  |

| S No | TESTS           | METHOD                        | UNIT        | RESULT |
|------|-----------------|-------------------------------|-------------|--------|
| 1    | Palladium as Pd | FSL(AS)/DP-STP-044,VERSION:08 | mg/kg (ppm) | 12.01  |

Remarks:

- 1) Samples tested on Received Basis.
- 2) Instrument used: ICP-MS (Make: Agilent, Model: 7800).
- 3) ppm: parts per million, mg: milligram, kg: kilogram, NA: Not Applicable.
- 4) The above reported results are for R&D information purpose only and not for any regulatory submission or QC release.

\*\*\*\*\* End of Report \*\*\*\*\*



**3m**

No: **658657**

**ORIGINAL**

Page 1 of 1

For FirstSource Laboratory Solutions LLP.  
(Analytical Services)

  
 27/12/2023  
 V Raju  
 (Sr.Manager – Drugs & Pharma)  
 Authorized Signatory

Note : This report is subject to the terms & conditions mentioned overleaf.

# IPC-MS spectra of compound-4h

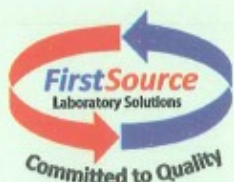

FirstSource Laboratory Solutions LLP.  
(Analytical Services)

## TEST REPORT

REPORT NO: FSLs(AS)-5231523002      DATE OF ISSUANCE OF REPORT: 27/12/2023

JOB REGISTRATION NO: FSLs(AS)-5231523      SAMPLE ID: FSLs(AS)-5231523002

| CUSTOMER DETAILS:                                                                      | SAMPLE DETAILS:                                                                                                                                               |
|----------------------------------------------------------------------------------------|---------------------------------------------------------------------------------------------------------------------------------------------------------------|
| ISSUED TO:<br>M/s Curia India Pvt.Ltd                                                  | NAME OF SAMPLE : IN-MRK-F-100-5<br>BRAND/ GRADE/ VARIETY : NA<br>BATCH NO/ LOT NO/ CODE : IN-MRK-F-100-5<br>DATE OF MANUFACTURING : NA<br>DATE OF EXPIRY : NA |
| ADDRESS:<br>Thurkapally, Shameerpet<br>Genome valley,RR District<br>Hyderabad- 500078. | QUANTITY OF SAMPLE RECEIVED : ~1.0 g x 1 No<br>MODE OF PACKING : Packed in sealed vial<br>SEAL DETAILS : Intact<br>ANY OTHER INFORMATION : NA                 |

SAMPLE NOT DRAWN BY FSLs(AS)

TEST DETAILS AND RESULTS:  
SAMPLE REGISTRATION DATE: 22/12/2023      ANALYSIS START DATE: 26/12/2023      ANALYSIS COMPLETED DATE: 26/12/2023

| S No | TESTS           | METHOD                         | UNIT        | RESULT |
|------|-----------------|--------------------------------|-------------|--------|
| 1    | Palladium as Pd | FSLs(AS)/DP-STP-044,VERSION:08 | mg/kg (ppm) | 41.20  |

Remarks:

- 1) Samples tested on Received Basis.
- 2) Instrument used: ICP-MS (Make: Agilent, Model: 7800).
- 3) ppm: parts per million, mg: milligram, kg: kilogram, NA: Not Applicable.
- 4) The above reported results are for R&D information purpose only and not for any regulatory submission or QC release.

\*\*\*\*\* End of Report \*\*\*\*\*

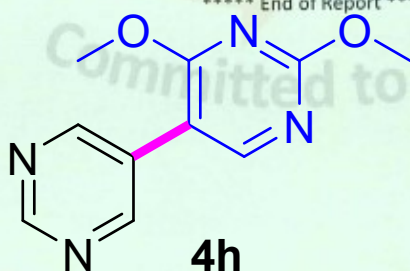

**4h**

For FirstSource Laboratory Solutions LLP.  
(Analytical Services)

*V Raju*  
27/12/2023

V Raju  
(Sr.Manager – Drugs & Pharma)  
Authorized Signatory

658658

ORIGINAL

Page 1 of 1

No:

Note : This report is subject to the terms & conditions mentioned overleaf.

# IPC-MS spectra of compound-5a



**FirstSource Laboratory Solutions LLP.**  
(Analytical Services)

**TEST REPORT**

|                                                                                         |  |                                             |                                     |
|-----------------------------------------------------------------------------------------|--|---------------------------------------------|-------------------------------------|
| REPORT NO: FSLS(AS)-5231523003                                                          |  | DATE OF ISSUANCE OF REPORT: 27/12/2023      |                                     |
| JOB REGISTRATION NO: FSLS(AS)-5231523                                                   |  | SAMPLE ID: FSLS(AS)-5231523003              |                                     |
| <b>CUSTOMER DETAILS:</b>                                                                |  | <b>SAMPLE DETAILS:</b>                      |                                     |
| ISSUED TO:<br>M/s Curia India Pvt.Ltd                                                   |  | NAME OF SAMPLE : IN-MRK-G-116-1             |                                     |
| ADDRESS:<br>Thurkapally, Shameerpet<br>Genome valley, RR District<br>Hyderabad- 500078. |  | BRAND/ GRADE/ VARIETY : NA                  |                                     |
|                                                                                         |  | BATCH NO/ LOT NO/ CODE : IN-MRK-G-116-1     |                                     |
|                                                                                         |  | DATE OF MANUFACTURING : NA                  |                                     |
|                                                                                         |  | DATE OF EXPIRY : NA                         |                                     |
|                                                                                         |  | QUANTITY OF SAMPLE RECEIVED : ~1.0 g x 1 No |                                     |
|                                                                                         |  | MODE OF PACKING : Packed in sealed vial     |                                     |
|                                                                                         |  | SEAL DETAILS : Intact                       |                                     |
|                                                                                         |  | ANY OTHER INFORMATION : NA                  |                                     |
| SAMPLE NOT DRAWN BY FSLS(AS)                                                            |  |                                             |                                     |
| <b>TEST DETAILS AND RESULTS:</b>                                                        |  |                                             |                                     |
| SAMPLE REGISTRATION DATE: 22/12/2023                                                    |  | ANALYSIS START DATE: 26/12/2023             | ANALYSIS COMPLETED DATE: 26/12/2023 |

| S No | TESTS           | METHOD                         | UNIT        | RESULT |
|------|-----------------|--------------------------------|-------------|--------|
| 1    | Palladium as Pd | FSLS(AS)/DP-STP-044,VERSION:08 | mg/kg (ppm) | 1.88   |

**Remarks:**

- 1) Samples tested on Received Basis.
- 2) Instrument used: ICP-MS (Make: Agilent, Model: 7800).
- 3) ppm: parts per million, mg: milligram, kg: kilogram, NA: Not Applicable.
- 4) The above reported results are for R&D information purpose only and not for any regulatory submission or QC release.

\*\*\*\*\* End of Report \*\*\*\*\*



**5a**

**658659**

**ORIGINAL**

Page 1 of 1

For FirstSource Laboratory Solutions LLP.  
(Analytical Services)

*V Raju*  
27/12/2023  
V Raju  
(Sr. Manager – Drugs & Pharma)  
Authorized Signatory

No: \_\_\_\_\_ Note : This report is subject to the terms & conditions mentioned overleaf.

## 11. References:

1. Pena, M. A.; Perez Sestelo, J.; Sarandeses, L. A. Palladium-Catalyzed Aryl– Aryl Cross-Coupling Reaction Using Ortho-Substituted Arylindium Reagents. *J. Org. Chem.* **2007**, *72*, 1271.
2. Bhattacharjee, P.; Dewan, A.; Boruah, P. K.; Das, M. R.; Mahanta, S. P.; Thakur, A. J.; Bora, U. Bimetallic Pd–Ag nanoclusters decorated micro-cellulose bio-template towards efficient catalytic Suzuki–Miyaura coupling reaction of nitrogen-rich heterocycles. *Green Chem.* **2022**, *24*, 7208.
3. Chen, W.; Chen, W.; Liu, M.; Wu, H. Construction of heterobiaryl skeletons through Pd-catalyzed cross-coupling of nitroarenes and heterocyclic arylboronate esters with a sterically demanding NHC ligand. *Org. Lett.* **2022**, *24*, 6983.
4. Horan, A. M.; Duong, V. K.; McGarrigle, E. M. Synthesis of Bis-heteroaryls Using Grignard Reagents and Pyridylsulfonium Salts. *Org. Lett.* **2021**, *23*, 9089.
5. Barder, T. E.; Buchwald, S. L. Efficient catalyst for the suzuki– miyaura coupling of potassium aryl trifluoroborates with aryl chlorides. *Org. Lett.* **2004**, *6*, 2649.
6. Pena, M. A.; Perez Sestelo, J.; Sarandeses, L. A. Palladium-Catalyzed Aryl– Aryl Cross-Coupling Reaction Using ortho-Substituted Arylindium Reagents. *J. Org. Chem.* **2007**, *72*, 1271.
7. Cervantes-Reyes, A.; Smith, A. C.; Chinigo, G. M.; Blakemore, D. C.; Szostak, M. Decarbonylative Pd-catalyzed Suzuki cross-coupling for the synthesis of structurally diverse heterobiaryls. *Org. Lett.* **2022**, *24*, 1678.
8. Saygili, N.; Batsanov, A. S.; Bryce, M. R. 5-Pyrimidylboronic acid and 2-methoxy-5-pyrimidylboronic acid: new heteroarylpyrimidine derivatives via Suzuki cross-coupling reactions. *Org. Biomol. Chem.* **2004**, *2*, 852.
9. Lai, B.; Ye, M.; Liu, P.; Li, M.; Bai, R.; Gu, Y. A novel and robust heterogeneous Cu catalyst using modified lignosulfonate as support for the synthesis of nitrogen-containing heterocycles. *Beilstein J. Org. Chem.* **2020**, *16*, 2888.
10. Tobisu, M.; Yasutome, A.; Yamakawa, K.; Shimasaki, T.; Chatani, N. Ni(0)/NHC-catalyzed amination of N-heteroaryl methyl ethers through the cleavage of carbon–oxygen bonds. *Tetrahedron*, **2012**, *68*, 5157.
11. Kudo, N.; Perseghini, M.; Fu, G. C. A versatile method for Suzuki cross-coupling reactions of nitrogen heterocycles. *Angew. Chem., Int. Ed.* **2006**, *45*, 1282.

12. Markovic, T.; Rocke, B. N.; Blakemore, D. C.; Mascitti, V.; Willis, M. C. Pyridine sulfinates as general nucleophilic coupling partners in palladium-catalyzed cross-coupling reactions with aryl halides. *Chem. Sci.* **2017**, *8*, 4437.
13. Choppin, S.; Gros, P.; Fort, Y. Unusual C-6 Lithiation of 2-Chloropyridine-Mediated by BuLi–Me<sub>2</sub>N(CH<sub>2</sub>)<sub>2</sub>OLi. New Access to 6-Functional-2-chloro pyridines and Chloro-bis-heterocycles. *Org. Lett.* **2000**, *2*, 803.
14. Guo, P.; Zhang, H.; Zhou, J.; Gallou, F.; Parmentier, M.; Wang, H. Micelle-Enabled Suzuki–Miyaura Cross-Coupling of Heteroaryl Boronate Esters. *J. Org. Chem.* **2018**, *83*, 7523.
15. Nguyen, J.; Chong, A.; Lalic, G. Nickel-catalyzed anti-Markovnikov hydroarylation of alkenes. *Chem. Sci.* **2019**, *10*, 3231.
16. Liao, J.; Basch, C. H.; Hoerrner, M. E.; Talley, M. R.; Boscoe, B. P.; Tucker, J. W.; Watson, M. P. Deaminative reductive cross-electrophile couplings of alkylpyridinium salts and aryl bromides. *Org. Lett.* **2019**, *21*, 2941.
